1           **Macrophages stimulate epicardial VEGF<sub>aa</sub> to trigger cardiomyocyte**  
2           **proliferation in larval zebrafish heart regeneration**

3  
4     Finnius A. Bruton<sup>1\*</sup>, Aryan Kaveh<sup>1</sup>, Katherine Ross-Stewart<sup>1</sup>, Gianfranco Matrone<sup>1</sup>,  
5     Magdalena Oremek<sup>2</sup>, Emmanouil G. Solomonidis<sup>1</sup>, Carl Tucker<sup>1</sup>, John Mullins<sup>1</sup>, Mairi  
6           Brittan<sup>1</sup>, Jonathan Taylor<sup>3</sup>, Adriano Rossi<sup>2</sup>, Martin Denvir<sup>1</sup>.

7     <sup>1</sup>Centre for Cardiovascular Science, Queen's Medical Research Institute, University  
8     of Edinburgh, Edinburgh, United Kingdom.

9     <sup>2</sup>Centre for Inflammation Research, Queen's Medical Research Institute, University  
10    of Edinburgh, Edinburgh, United Kingdom.

11    <sup>3</sup>Department of Physics, University of Glasgow, Glasgow, United Kingdom.

12    Corresponding author: \*

13  
14    **Abstract**

15  
16    Cardiac injury induces a sustained innate immune response in both zebrafish and  
17    mammals. Macrophages, highly plastic immune cells, perform a range of both  
18    beneficial and detrimental functions during mammalian cardiac repair yet their precise  
19    roles in zebrafish cardiac regeneration are not fully understood. Here we characterise  
20    cardiac regeneration in the rapidly regenerating larval zebrafish laser injury model and  
21    use macrophage ablation and macrophage-less *irf8* mutants to define the requirement  
22    of macrophages for key stages of regeneration. We found macrophages to display  
23    cellular heterogeneity and plasticity in larval heart injury as in mammals. Live  
24    heartbeat-synchronised imaging and RNAseq revealed an early proinflammatory  
25    macrophage phase which then resolves to an anti-inflammatory, profibrotic phase.  
26    Macrophages are required for cardiomyocyte proliferation but not for functional or  
27    structural recovery following injury. Macrophages are specifically recruited to the  
28    epicardial-myocardial niche, triggering the expansion of the epicardium which  
29    upregulates mitogen VEGF<sub>aa</sub>. Experimental perturbation of VEGF signalling  
30    confirmed VEGF<sub>aa</sub> to be an important inducer of cardiomyocyte proliferation revealing

31 a previously unrecognised mechanism by which macrophages aid cardiac  
32 regeneration.

33

## 34 **Introduction**

35

36 Zebrafish are highly regenerative, exhibiting the capacity to restore full structure and  
37 functionality of a wide range of different tissues following injury or degeneration<sup>1–5</sup>.

38 Cardiac injury is one such example where adult mammals are only able to facilitate  
39 maladaptive repair whilst zebrafish exhibit full tissue regeneration<sup>6,7</sup>. In humans, the  
40 most clinically severe form of cardiac injury is myocardial infarction (MI), where  
41 occlusion of a coronary artery triggers ischemic injury to the myocardium leading to  
42 the loss of approximately 1 billion cardiomyocytes<sup>8</sup>. Adult mammalian cardiomyocytes  
43 are considered post-mitotic, switching to hypertrophic growth shortly after birth and  
44 are therefore unable to restore lost myocardium which is instead replaced with non-  
45 contractile scar tissue<sup>9</sup>. MI patients suffer a sequel of maladaptive remodelling leading  
46 to left ventricular dilation and thinning of the scar further decreasing the function of the  
47 heart<sup>10,11</sup>. Therefore, there is a need for medical innovation which can reverse this  
48 process.

49

50 In contrast to mammals, apical resection and cryoinjury models of MI in zebrafish show  
51 full regeneration of lost myocardium via the dedifferentiation and proliferation of  
52 surviving cardiomyocytes<sup>12,13</sup>. Cardiac regeneration is complex and dynamic, with  
53 zebrafish hearts undergoing debridement of dead myocardium, followed by transient  
54 fibrosis, revascularisation and subsequent replacement of cardiomyocytes<sup>14</sup>. The  
55 inflammatory response has been demonstrated to be crucial for each of these key  
56 events, both in zebrafish and also other regenerative species such as axolotls and  
57 neonatal mice<sup>15–17</sup>. Innate immune cells ‘macrophages’ have emerged as important  
58 regulators of tissue regeneration. Indeed macrophage ablation has been shown to  
59 abrogate regeneration across multiple organs and organisms, including the zebrafish  
60 heart<sup>15,16,18–22</sup>.

61

62 However, the precise contribution of macrophages to cardiac repair has been  
63 complicated by disparate results following macrophage perturbation in murine models  
64 of MI<sup>7,23–25</sup>. This is in part attributed to substantial heterogeneity of macrophage

65 subtypes and individual phenotypic plasticity<sup>26,27</sup>. Incidentally it is these same qualities  
66 that make macrophages ideally suited to modulating the dynamic signalling and  
67 cellular patterning of cardiac regeneration. Hence, macrophages are understood to  
68 exist on a multidimensional spectrum of phenotypes, informed both by the interaction  
69 environmental stimuli and ontological memory<sup>28</sup>. Recent studies have confirmed the  
70 presence of macrophage subsets in zebrafish yet their functional niche and  
71 interactions with other key cell types of the heart, such as the epicardium, remain  
72 poorly understood<sup>29,30</sup>.

73

74 Larval zebrafish regenerate more rapidly than adults, occurring in just 48 hours after  
75 cardiac laser injury in 3-day old larvae<sup>31,32</sup>. Combined with their amenability for live *in*  
76 *vivo* imaging and genetic tractability, this model becomes a powerful tool with which  
77 to carefully examine how macrophages support multiple aspects of cardiac  
78 regeneration.

79

80 Here we perform an in-depth characterisation of several key processes in larval  
81 zebrafish cardiac regeneration, finding the heart regeneration program between the  
82 larvae and adult to be highly conserved. Perturbation of macrophage presence  
83 following injury using metronidazole-nitroreductase ablation or the macrophage null  
84 *irf8*<sup>-/-</sup> mutant<sup>33</sup> demonstrated a requirement for these cells in removal of apoptotic  
85 cells, epicardial activation and cardiomyocyte proliferation. We found that epicardial  
86 VEGF<sub>aa</sub> is required to induce cardiomyocyte proliferation following injury.  
87 Macrophages invade the epicardial-myocardial niche and ablation of macrophages  
88 prior to injury blocks epicardial expansion, preventing an increase of VEGF<sub>aa</sub>  
89 expression and therefore precluding cardiomyocyte proliferation.

90

91

## 92 **Results**

93

### 94 **Macrophages display cellular heterogeneity following cardiac injury**

95

96 We have previously demonstrated a sustained macrophage response to cardiac injury  
97 in zebrafish larvae<sup>32</sup> but it is not yet known if these cells are heterogenous and contain  
98 subsets. Thus the heterogeneity of macrophages following tissue injury is limited to a

99 handful of studies where fluorescent reporter lines have been combined to visualise  
100 subsets<sup>18,29,30,34</sup>. To assess macrophage heterogeneity following cardiac injury, we  
101 crossed the widely used zebrafish pan macrophage reporter line *Tg(mpeg1:GFP)* with  
102 *Tg(csf1ra:gal4;UAS:mCherry-NfsB)* (shortened here to *csf1ra: mCherry*). *csf1ra*  
103 (colony stimulated factor 1 receptor) is a cytokine required for macrophage  
104 development and used as a macrophage reporter promotor in mammals.

105

106 Larval hearts were lasered at the ventricular apex at 72 hours post-fertilisation (hpf)  
107 and subsequently imaged at 2, 6, 24, and 48 hours post injury (hpi) timepoints (Figure  
108 1a). Macrophages migrate to the injured ventricular apex within two hours, peak at 6  
109 and maintain elevated numbers until 48 hpi (Figures 1b & 1c). We found not all  
110 recruited macrophages were co-positive for both transgenes, leading to three subsets  
111 1) *mpeg1+csf1ra-* (19.3±5.1%), 2) *mpeg1-csf1ra+* (2.8±2.1%) and 3) *mpeg1+csf1ra+*  
112 (77.9±5.7%). Similar dynamics were seen for subsets 1 & 3 but since *mpeg1-csf1ra+*  
113 were exceedingly rare (most often not present at all in injured hearts) it is not possible  
114 to know if the dynamics are likewise similar. Both subsets exhibit a range of  
115 morphologies with no overt difference (Figure 1d, Video 1). Whole-larva  
116 epifluorescence images revealed an anterior-posterior gradient of co-positivity, with  
117 most macrophages being *mpeg1+csf1ra+* anteriorly and decreasing *csf1ra:mCherry*  
118 positivity toward the tail (Supplementary Figure 1a). Taken together, our data  
119 demonstrate that larval macrophages recruited to cardiac injury are heterogenous in  
120 their markers, similar to adult zebrafish and mouse models<sup>23,34</sup>.

121

## 122 **Macrophages display cellular plasticity following cardiac injury**

123

124 Macrophages also display remarkable plasticity in their phenotypes, changing  
125 activation states via enhancer landscapes in response to extrinsic stimuli<sup>27</sup>. In  
126 zebrafish, *tnfα* has emerged as a convenient marker for inflammatory macrophages,  
127 with several studies reporting their importance for a tissue regeneration in a variety of  
128 tissues<sup>18,21,30</sup>.

129

130 We therefore performed cardiac laser injury on *Tg(tnfα:GFP;mpeg1:mCherry)* larvae,  
131 finding a subset of *mpeg1+* macrophages to be marked by *tnfα:GFP* expression

132 (Figure 1e). Quantification of  $\text{tnf}\alpha^+$  macrophage number revealed this subset is  
133 transient, found only at the 24 hpi timepoint and rarely in uninjured larvae (Figure 1g).  
134 At the 24 hpi,  $\text{tnf}\alpha^+\text{mpeg1}^+$  macrophages make up just  $19.3\pm 4.9\%$  of macrophages  
135 whereas the majority ( $71.8\pm 6.2\%$ ) are  $\text{tnf}\alpha^-\text{mpeg1}^+$  (Supplementary figure 1b).  
136 Surprisingly, the remaining  $8.8\pm 4.1\%$  of injury-recruited cells are  $\text{tnf}\alpha^+\text{mpeg1}^-$ ,  
137 displaying macrophage morphology and behaviour.

138

139 We reasoned that if these  $\text{tnf}\alpha^+$  macrophages were indeed inflammatory  
140 macrophages then it should be possible to increase their abundance via application of  
141 M1-polarisation cytokine IFN- $\gamma$ . A single intravenous injection of zebrafish  
142 recombinant protein IFN- $\gamma$ -rel immediately prior to cardiac injury increased the  
143 proportion of  $\text{tnf}\alpha^+\text{mpeg1}^+$  macrophages from  $26.4\pm 11.0\%$  in PBS injected controls to  
144  $78.8\pm 9.5\%$ , supporting the idea that these are inflammatory macrophages  
145 (Supplementary figure 1c-e).

146

147 To verify whether this is plasticity at the level of individual cells or recruitment of a pre-  
148 polarised subtype, we performed *in vivo* imaging live in the beating heart. Timelapse  
149 imaging clearly showed recruited macrophages becoming  $\text{tnf}\alpha:\text{GFP}^+$  after arrival at  
150 the injured ventricle, confirming that this represents an *in situ* conversion (Figure 1g,  
151 Supplementary video 2). Conversely, we also observed an instance of a  $\text{tnf}\alpha^+\text{mpeg1}^+$   
152 arriving at the injured ventricle pre-converted (Figure 1g). Finally, we observed that  
153 macrophages appear to retract pseudopods and become spherical once arriving at  
154 the ventricle (Supplementary figure 1f).

155

156 **Metronidazole-nitroreductase ablation and *irf8*<sup>-/-</sup> mutants provide a macrophage**  
157 **null injury setting**

158

159

160 We next sought to understand what role macrophages are playing in the regeneration  
161 of the larval heart, which occurs after just 48 hours<sup>31,32</sup>. To test this, we used two  
162 completely different methods to induce macrophage-less hearts. Firstly we used the  
163 *Tg(csf1ra:gal4;UAS:mCherry-nfsB)* line that expresses a nitroreductase enzyme 'nfsB'  
164 in macrophages, leading to cell-specific apoptosis when exposed to prodrug

165 metronidazole<sup>35</sup>. We were able find dose that ablated macrophages but left other cells  
166 such as neutrophils unaffected (Figure 2b & 2c, Supplementary figure 2a-d) and able  
167 to respond to wounds (Supplementary figure 2e). We were able completely abolish  
168 macrophage recruitment, with only *mpeg1+/csf1ra+* cells being 1-2 apoptotic bodies  
169 of resident cardiac macrophages (Figure 2a & 2d).

170

171 The second method was the use of the macrophage null *irf8*<sup>-/-</sup> mutant. This mutant  
172 lacks the expression of *irf8*, a transcription factor required for macrophage  
173 development. This mutation generates macrophage null animals which are otherwise  
174 phenotypically normal (Figure 2e, Supplementary figure 3a-e)<sup>33</sup>. Presence of the  
175 mutation was verified both the presence of the mutation by PCR (Figure 2f) and the  
176 absence of macrophages by vital stain neutral red (Figure 2g). Both models therefore  
177 provide powerful tools to dissect the role of macrophages in heart regeneration in  
178 larval zebrafish.

179

180

## 181 **Macrophages contribute to the removal of apoptotic cardiomyocytes following** 182 **injury**

183

184 The best-known function of macrophages is the removal of dead cells as part of tissue  
185 homeostasis but also following tissue injury<sup>36</sup>. We therefore endeavoured to  
186 characterise cell death dynamics in our model of cardiac regeneration as well as the  
187 requirement of macrophages in the removal of cellular debris.

188

189 Using the line *Tg(myl7:mKateCAAX;myl7:h2b-GFP)* that labels cardiomyocyte  
190 sarcolemma and chromatin respectively, we observed that following injury, a circlet of  
191 cardiomyocytes with pyknotic nuclei forms around the lesion site (Figure 3a). These  
192 pyknotic nuclei were TUNEL<sup>+</sup> at 6 hpi, confirming apoptosis and mirroring the  
193 apoptotic border zone observed in mammalian infarcts<sup>14,37</sup> (Figure 3b). Interestingly,  
194 endogenous fluorescence is lost from the lesion as early as 0.5 hpi (Figure 3c). We  
195 hypothesised that the epicentre of the laser lesion may contain cells that immediately  
196 die upon injury by necrosis. To test this, the membrane-impermeable, fluorescent DNA  
197 intercalator propidium iodide (PI) was injected intravenously immediately following  
198 injury (<0.5 hpi) to label necrotic cells. We found that there were indeed PI<sup>+</sup> cells in

199 the GFP- region and PI+ debris scattered across the proximal myocardium from 1 hpi  
200 (Figure 3d).

201

202 To discover how quickly this necrotic debris was cleared we used heartbeat-  
203 synchronised light sheet microscopy<sup>38</sup> to image the injured heart of PI-injected  
204 *Tg(mpeg1:GFP;myl7:h2b-GFP;myl7:mKateCAAX)* larva in timelapse. Necrotic cells  
205 are cleared rapidly within the first 0-2 hpi (Figure 3e, Video 3). We also observed  
206 condensed necrotic cells squeezing out from the myocardium into the pericardial  
207 cavity, independently of macrophage contact (Video 3). In a similar time-lapse  
208 experiment we imaged injured *Tg(myl7:mKateCAAX;myl7:h2b-GFP)* larva to see how  
209 quickly cells start to condense their nuclei as part of programmed cell death. We found  
210 that this too occurs extremely rapidly and is noticeable within just 1.5 hpi (Figure 3f,  
211 Video 4).

212

213 To test if macrophages aid in removal of damaged myocardium we performed time-  
214 lapse imaging at a later timepoint (4hpi) in injured *Tg(myl7:GFP;mpeg1:mCherry)*  
215 larvae. By 3D surface rendering the GFP+ cardiomyocytes and mCherry+  
216 macrophages we observed small GFP+ pieces of debris near the GFP- lesion being  
217 removed and internalised by macrophages (Figure 3g, Video 5).

218

219 To determine if macrophages are required for the removal of apoptotic cells, we  
220 performed TUNEL staining on *irf8*<sup>-/-</sup> and *irf8*<sup>+/+</sup> *Tg(myl7:h2b-GFP)* larvae at the  
221 standard 2, 6, 24, 48 hpi timepoints (Figure 3h & 3i). In injured *irf8*<sup>+/+</sup> hearts, the  
222 number of apoptotic cardiomyocytes significantly increased at 2 hpi and 6 hpi  
223 compared to uninjured controls ( $4.1 \pm 0.9$  vs  $0.0 \pm 0.0$  and  $5.3 \pm 1.0$  vs  $0.1 \pm 0.1$   
224 respectively). By 24 hpi, apoptotic cardiomyocytes are no longer significantly  
225 increased in injured *irf8*<sup>+/+</sup> hearts ( $0.01 \pm 0.01$  uninjured vs  $0.2 \pm 0.1$  injured). However,  
226 although injured macrophage-null *irf8*<sup>-/-</sup> hearts begin with a similar pattern of cell death  
227 at 2hpi and 6hpi ( $5.5 \pm 0.8$  &  $5.9 \pm 0.9$  apoptotic cardiomyocytes respectively), apoptotic  
228 cardiomyocyte cells are still present at 24 hpi, returning to uninjured levels by 48 hpi.

229

230 In the macrophage ablation model, we saw a similar pattern of results where the  
231 numbers of apoptotic cells are negligible in uninjured hearts of all treatment groups

232 but peak at 6 hpi in injured groups (NTR+met-, NTR-met+ & NTR+met+ =6.4±0.5,  
233 6.4±0.5 & 6.0±0.5) (Figure 3J). By 24 hpi the non-ablated control groups had no longer  
234 possessed significantly increased numbers of TUNEL+ myocardial cells (NTR+met- =  
235 0.4±0.3 & NTR-met+ = 0.08±0.08) (Figure 3h & 3j). However, the injured macrophage-  
236 ablated group showed a retention of apoptotic cells at 24 hpi (NTR+met+ = 1.5±0.3)  
237 that resolved by 48 hpi. These results confirm the finding in the *irf8*<sup>-/-</sup> model that  
238 macrophages are required for the timely removal of apoptotic myocardial cells.

239

240

### 241 **Macrophages are not required for structural or functional recovery of the heart**

242

243 In adult zebrafish models of myocardial infarction there is full restoration of contractility  
244 and structure within 30-60 days<sup>37</sup>. It was therefore important to determine if there was  
245 full structural and functional recovery in the larval model of cardiac injury and if this  
246 was macrophage-dependent.

247

248 We lasered *Tg(myl7:GFP)* larvae in the macrophage ablation model. Using heartbeat-  
249 synchronised LSM it was possible to acquire detailed 3D scans of cardiac structure  
250 of individual larvae across multiple timepoints (Figure 4a). In all treatment groups, the  
251 lesion remained the same size (~750µm<sup>2</sup>) between 2 hpi and 6 hpi, with no difference  
252 between groups. By 24 hpi this lesion had almost completely regressed (95% to  
253 37.1µm<sup>2</sup>±24.4) in macrophage replete NTR+met- larvae (Figure 4b). However, in both  
254 the macrophage ablated NTR+met+ and the other macrophage replete NTR-met+  
255 larvae, lesion closure was slightly delayed at 24 hpi (73% and 75% to 234.7±59.7 µm<sup>2</sup>  
256 and 221.4±84.6 µm<sup>2</sup> respectively). By 48 hpi the lesions of larvae from each group  
257 had entirely regressed and luminal surface renders of injured ventricles showed  
258 normal trabecular structure (Figure 4a). These results suggest macrophages are not  
259 required for lesion closure, but that metronidazole-treatment slightly delays this  
260 process.

261

262 We next sought to understand if this was also true of cardiac function. Again using  
263 *Tg(myl7:GFP)* larvae, we acquired lateral-view videos of beating hearts by  
264 epifluorescence, and calculated ventricular ejection fraction (Figure 4c &



265 Supplementary Figure 4a & 4b). Immediately following injury at 2 hpi ejection fraction  
266 is severely depressed in all groups from ~74% in uninjured ventricles to ~54% in  
267 injured. Ejection fraction recovers quickly by 6 hpi, with none of the treatment groups  
268 being significantly different to their respective uninjured controls but there still being a  
269 strong trend for injured larvae to have decreased ejection fraction (~78% injured vs  
270 87% uninjured). At 24 hpi and 48 hpi this trend is also gone for all treatment groups  
271 and injured hearts are functionally indistinguishable from uninjured hearts. This data  
272 suggests that injured larval hearts recover their function rapidly and that this recovery  
273 is not macrophage dependent.

274

275 We next performed identical experiments examining the recovery of cardiac structure  
276 and function with *Tg(myl7:GFP)* larvae on an *irf8* mutant background. Both *irf8*<sup>+/+</sup> and  
277 *irf8*<sup>-/-</sup> genotype larvae showed substantial lesion regression (~80%) between 6 hpi  
278 and 24 hpi (898.6  $\mu\text{m}^2 \pm 189.7$  to 211.6  $\mu\text{m}^2 \pm 115.8$  vs 1002.9  $\mu\text{m}^2 \pm 158.4$  to 113.89  
279  $\mu\text{m}^2 \pm 59.5$  respectively) (Figure 4d & 4e). No difference in lesion size was seen at any  
280 timepoint and both genotypes had completely closed their lesions by 48 hpi. Normal  
281 trabecular structure was seen in both groups at 48 hpi following full structural recovery  
282 (Figure 4d). The recovery of ejection fraction in this model followed the same trend as  
283 that of the metronidazole-nitroreductase model, with the ejection fraction of injured  
284 larvae indistinguishable from uninjured larvae by 24 hpi in both genotypes (Figure 4e).  
285 Our near identical findings in the *irf8* macrophage null model confirm that larval hearts  
286 rapidly recover following laser injury and this is macrophage independent.

287

288 Finally, we wished to understand the mechanism of lesion closure, particularly how it  
289 was able to occur so rapidly following laser injury. We performed heart synchronised  
290 time-lapse imaging of lesions immediately following injury in *Tg(myl7:GFP)* larvae.  
291 Surface rendering of 3D scans of heart facilitated interpretation of morphological  
292 changes in myocardial volume (Figure 4g, Video 6). We observed GFP<sup>+</sup> myocardial  
293 budding on opposite sides of the lesion border zone and subsequent invasion into the  
294 lesion, adhering to form a bridge. In order to ascertain if these buds and bridges  
295 represented individual pioneer cardiomyocytes, we repeated these live imaging  
296 experiments in *Tg(myl7:h2b-GFP;myl7:mKateCAAX)* larvae, facilitating the tracking of  
297 individual cardiomyocytes by virtue of their labelled nuclei and plasma membranes

298 (Figure 4h, Video 7). The initially disorganised surviving cardiomyocytes bordering the  
299 lesion began to extend protrusions into the lesion until they adhere with other single  
300 cardiomyocytes bridging from the opposing side of the lesion.

301

### 302 **Macrophage ablation abolishes injury-associated increase in cardiomyocyte** 303 **proliferation**

304

305 To test if laser injury increases cardiomyocyte proliferation, we performed EdU staining  
306 in *Tg(myI7:h2b-GFP)* larvae in two experiments. The first where uninjured and injured  
307 larvae were exposed to EdU during 0-24 hpi and the second where the exposure  
308 occurs 24-48 hpi (Figure 5a). Analysis of the proportion of h2b-GFP+ with EdU  
309 incorporation immediately following the EdU pulse indicated the presence of cycling  
310 cardiomyocytes over both days (Figure 5b & 5c). EdU incorporation into  
311 cardiomyocyte nuclei was organ-wide, most often seen in pairs of cardiomyocytes but  
312 with no obvious distal or proximal localisation relative to the lesion (Figure 5b).  
313 Comparison between uninjured and injured hearts revealed no significant difference  
314 in the proportion of EdU+ cardiomyocyte nuclei 0-24 hpi ( $21.3\pm 3.3$  vs  $18.9\pm 3.4$   
315 respectively) (Figure 5c). However, over 24-48 hpi there was 35% increase in the  
316 proportion of EdU+ cardiomyocytes in injured hearts relative to uninjured ( $43.5\pm 1.8\%$   
317 vs  $32.2\pm 2.0\%$  respectively). Timelapse *in vivo* imaging of dividing cardiomyocytes  
318 showed nuclear division followed by cytokinesis, exclusively giving rise to  
319 mononuclear cells with no obvious hypertrophy (Video 8, Supplementary Figure 5a).

320

321 In order to understand if macrophages are required for the injury-dependent increase  
322 in cardiomyocyte proliferation we EdU pulsed only over the proliferative 24-48 hpi  
323 window in the macrophage-less models (Figure 5d). In the metronidazole-  
324 nitroreductase ablation model we found that the percentage of EdU+ cardiomyocytes  
325 increased in injured hearts in both the NTR+met- and NTR-met+ control groups but  
326 not in the macrophage-ablated NTR+met+ (Figure 5e & 5f). This result indicates that  
327 macrophages are a requirement for injury-dependent increase in cardiomyocyte  
328 proliferation. However, in contrast to the metronidazole-nitroreductase model, analysis  
329 of cardiomyocyte proliferation in *irf8*<sup>-/-</sup> mutants revealed that they too significantly  
330 increased the percentage of EdU+ cardiomyocytes following injury, comparably to

331 *irf8*<sup>+/+</sup> larvae (Figure 5g & 5h). To resolve this disparity, we examined more closely  
332 the differences between these models. We found, like others, that *irf8*<sup>-/-</sup> mutants  
333 possess a greater global number of neutrophils than *irf8*<sup>+/+</sup> and mount a larger  
334 neutrophil response to injury (Supplementary Figure 5b & 5c). Since we do not  
335 observe an increased neutrophil response in NTR+met<sup>+</sup> larvae, we hypothesised that  
336 neutrophils might be compensating for macrophages in *irf8*<sup>-/-</sup> larvae (Supplementary  
337 Figure 5d). To test this hypothesis, we inhibited neutrophil recruitment in *irf8*<sup>-/-</sup> larvae  
338 using a well-established antagonist 'SB225002' which blocks CXCR1/2 activation, a  
339 key chemokine receptor for neutrophil migration. CXCR1/2 inhibition successfully  
340 lowered the number of recruited neutrophils ( $2.0 \pm 3.4$  vs  $0.43 \pm 0.18$ ) and abolished  
341 injury associated increase in cardiomyocytes in *irf8*<sup>-/-</sup> (Supplementary Figure 5e-g).  
342 Taken together this suggests that macrophages are important in inducing  
343 cardiomyocyte proliferation but are not an absolute requirement and can be  
344 substituted for by excess neutrophils.

345

#### 346 **Cardiac injury induces epicardial activation and VEGF<sub>aa</sub> upregulation**

347

348 Macrophages are known to secrete a variety of growth factors and cytokines following  
349 cardiac injury but it is controversial whether these factors are directly required for  
350 cardiomyocyte proliferation *in vivo*<sup>39,40</sup>. We thought it plausible that macrophages may  
351 be releasing a key mitogen following laser injury. VEGF<sub>aa</sub> has recently been  
352 demonstrated to drive cell cycle entry in adult zebrafish following cryoinjury and is  
353 highly expressed in macrophages in larval trunk injury<sup>21,41</sup>. We hypothesised that  
354 macrophages may be promoting cardiomyocyte proliferation via the release of  
355 VEGF<sub>aa</sub> mitogen. Therefore we performed laser injury in  
356 *Tg(vegfaa:GFP;mpeg1:mCherry)* larvae to examine potential colocalised expression.  
357 However, no vegfaa expression was observed in macrophages at any timepoint, in  
358 uninjured or injured hearts (Supplementary Figure 6a & 6b).

359

360 In contrast, substantial vegfaa expression was observed in mesothelial cells overlying  
361 the myocardium (Figure 6a). Colocalisation with established epicardial marker *tcf21* in  
362 *Tg(tcf21:DsRed;vegfaa:GFP)* larvae confirmed these cells to be early epicardium  
363 (Figure 5b). We tested if epicardial vegfaa:GFP expression increased still further

364 following larval cardiac injury by fluorescence intensity analysis of 3D *in vivo* imaging.  
365 vegfaa:GFP intensity increased significantly at 48 hpi with a strong trend to increase  
366 at 24 hpi (Figure 6d & 6e). Quantification of the total number of ventricular epicardial  
367 cells revealed that both the number of cells and their individual vegfaa:GFP expression  
368 increased following cardiac injury (Supplementary Figure 6c & 6d)

369

### 370 **Macrophages localise to the epicardial niche and induce epicardial expansion**

371

372 Since macrophages did not appear to express this known mitogen themselves, we  
373 wondered if their presence might be required to induce VEGFaa expression in  
374 epicardium. Supporting this hypothesis, detailed 3D analysis of macrophage  
375 localisation following injury showed recruited macrophages to synapse with epicardial  
376 cells by invading the myocardial-epicardial niche (Figure 6e). Given macrophage  
377 ablation abolishes injury-dependent cardiomyocyte proliferation (Figure 5f), we used  
378 metronidazole-nitroreductase model to ablate macrophages and assess whether  
379 epicardial activation still occurs following injury. We found that following injury,  
380 increased vegfaa:GFP expression was observed both NTR-met<sup>+</sup> and NTR+met-  
381 groups but this failed to occur in NTR+met<sup>+</sup> hearts, with vegfaa:GFP expression not  
382 significantly higher than in uninjured (Figure 6f & 6g). Interestingly, macrophage  
383 ablation did not affect vegfaa:GFP expression per cell but did block the expansion of  
384 epicardial cell number following injury (Figure 6h & Supplementary Figure 6e). Our  
385 data therefore suggests that recruitment of macrophages to epicardium is required for  
386 subsequent epicardial activation and expansion, as well to increase in net cardiac  
387 vegfaa expression.

388

### 389 **VEGFaa is both required for, and sufficient for, cardiomyocyte proliferation in** 390 **larval zebrafish**

391

392 Although VEGFaa has been shown to be a potent inducer of cardiomyocyte  
393 hyperplasia in adult zebrafish and hypertrophy in adult mice, it is not known whether  
394 this is also true in larval zebrafish<sup>41-43</sup>. We first tested if VEGFaa alone is sufficient to  
395 stimulate cardiomyocyte proliferation in the absence of cardiac injury. Recombinant  
396 zebrafish VEGFaa protein (zVEGFaa) or PBS control solution was microinjected into  
397 circulation via the sinus venosus of 72 hpf *Tg(myl7:h2b-GFP)* larvae and total

398 cardiomyocyte number assessed at 24 and 48 hpt (Figure 7a). A single injection of  
399 zfVEGFaa at 3 dpf increased total cardiomyocyte number by 13.3% relative to PBS-  
400 injected controls at 24 hpi (Figure 7b & 7c). Interestingly, by 48 hpt this is no longer  
401 statistically significantly different. This data confirms that VEGFaa is sufficient to  
402 stimulate hyperplasia in larval zebrafish hearts.

403

404 To test if VEGF signalling is required for the injury-associated cardiomyocyte  
405 proliferation, we used a pan-VEGFR receptor antagonist AV951 (Tivozanib) to block  
406 VEGF signalling. AV951 is a highly potent small molecule inhibitor and is widely used  
407 in larval zebrafish angiogenic assays as it can be easily delivered to tissues via  
408 bathing, commonly at concentrations of 500nM<sup>44,45</sup>. Our own validation and dose  
409 optimisation of VEGFR inhibition via a larval-laser trunk injury neovascularisation  
410 model<sup>21</sup> found AV951 could completely abolish neovascularisation in skeletal muscle  
411 at doses as low as 10nM (Supplementary Figure 7a-c). Consequently, we bathed  
412 larvae in 10nM AV951 dose over the course of our cardiac injury model, pulsing with  
413 EdU at 24-48 hpi and quantifying EdU+ cardiomyocytes at 48 hpi (Figure 7d).  
414 Interestingly, AV951 decreased the proportion of EdU+ cardiomyocytes in both the  
415 uninjured and injured groups (uninjured 38.4±3.4 vs 28.0±3.0 and injured 42.9±3.8 vs  
416 31.6±2.2) (Figure 7e & 7f). This suggests that VEGF signalling in the heart is required  
417 for cardiomyocyte proliferation both as part of normal development and following  
418 cardiac injury. This agrees with our previous identification of constitutive epicardial  
419 VEGFaa expression in uninjured hearts.

420

### 421 **Notch and Nrg-ErbB signalling are required for cardiomyocyte proliferation**

422

423 Following the finding that VEGFR signalling is required for cardiomyocyte proliferation  
424 in both uninjured and injured hearts, we next sought to examine potential downstream  
425 effectors. Strong candidates were notch and neuregulin-ErbB signalling pathways.  
426 Notch signalling has been shown to be required for adult heart regeneration and  
427 cardiomyocyte proliferation in adult zebrafish<sup>46-48</sup> as well as in zebrafish heart  
428 development<sup>49</sup>. Neuregulin is a potent cardiac mitogen and has similarly been shown  
429 to be essential for adult regeneration as well as larval heart development<sup>50-54</sup>.

430 Therefore, we first examined if either of these signalling pathways were required for  
431 cardiomyocyte proliferation in the larval heart following injury.

432

433 The gamma secretase inhibitor DAPT ((N-[N-(3,5-difluorophenacetyl)-l-alanyl]-S-  
434 phenylglycine t-butyl ester) has been successfully used as a pan-notch inhibitor for  
435 over two decades and has been demonstrated in both zebrafish and drosophila to  
436 phenocopy various notch mutants<sup>55–57</sup>. We performed the laser injury on  
437 *Tg(myf7:nlsDsRed)* larvae, bathing them in either 100µm DAPT or a vehicle control  
438 solution following injury and quantified total cardiomyocyte number at 48 hpi (Figure  
439 7g). In agreement with previous studies, notch inhibition decreased cardiomyocyte  
440 number in uninjured hearts by ~8% (253.3±5.2 vs 233.4±4.5) (Figure 7h & 7i).  
441 Additionally, notch inhibition was similarly able to decrease cardiomyocyte number in  
442 injured hearts (266±5.6 vs 229±3.6). These results confirm that notch signalling is  
443 important for the expansion of cardiomyocyte number in both development and  
444 following cardiac injury.

445

446 We repeated this experiment, this time bathing larvae in an ErbB2 antagonist AG1478  
447 (Figure 7e). Small molecule inhibitor AG1478 selectively inhibits ErbB2, required co-  
448 receptor for ErbB4 dimerization and subsequent neuregulin signal transduction.  
449 AG1478 is widely used in zebrafish cardiac biology to inhibit neuregulin-ErbB  
450 signalling<sup>52,58–61</sup>, having been shown to faithfully phenocopy *erbb2* mutants<sup>62</sup>.  
451 Interestingly, the results exactly replicated those of the notch inhibition experiment,  
452 with decreased cardiomyocyte number in both uninjured (257.2±5.8 vs 235.2±4.2) and  
453 injured hearts (265.7±5.5 vs 229±5.9) (Figure 7j & 7k). These results suggest that, like  
454 notch signalling, neuregulin-ErbB signalling is required for the expansion of  
455 cardiomyocyte number in both uninjured and injured settings.

456

### 457 **Cardiac injury and VEGF<sub>A</sub> induce endocardial notch signalling**

458

459 Having demonstrated individual requirements for VEGF, notch and neuregulin-ERBB  
460 signalling, we were keen to test if they act in one pathway.

461

462 To reveal the epistatic relationship of these signalling components, we designed an  
463 experiment utilising the notch signalling reporter line *Tg(Tp1:venus-PEST)* as a  
464 readout of notch expression. The peptide sequence 'PEST' targets the fluorophore  
465 venus for rapid degradation and so increases temporal resolution of gene expression  
466 patterns. Recombinant zfVEGFaa or PBS control solution was injected into 3 dpf  
467 larvae and hearts analysed by heart-synchronised light-sheet microscopy for changes  
468 in notch signalling at 6, 24 and 48 hpi (Figure 8a). Furthermore, an additional group of  
469 larvae were injected with zfVEGFaa but also bathed in ErbB2 antagonist AG1478. We  
470 hypothesised a VEGFaa->notch->Nrg-ERBB pathway hierarchy (Figure 8b) and  
471 therefore reasoned that zfVEGFaa injection should upregulate notch signalling but that  
472 inhibition of Nrg-ErbB signalling should be unable to suppress zfVEGFaa-induced  
473 notch upregulation.

474

475 In agreement with previous studies<sup>63,64</sup> we found that in PBS-injected larvae, notch  
476 signalling was primarily in the endocardium, colocalising with endothelial reporter  
477 *kdrl:mCherry*, and in the occasional cardiomyocyte (Figure 8b). Notch signalling in  
478 larval cardiomyocytes has been recently shown to be the result of lateral inhibition  
479 during trabeculation whereas endocardial notch is known to drive cardiomyocyte  
480 proliferation<sup>63</sup>. Interestingly, endocardial notch signal was relatively low and only  
481 detectable in a subset of larvae at any given timepoint (Figure 8c). We therefore  
482 assessed if the percentage of hearts with *Tp1:venus-PEST+* (notch+) endocardium  
483 increased following zfVEGFaa injection. zfVEGFaa injection significantly increased  
484 the percentage of notch+ endocardium from 46.4% to 78.6% at 6 hpi. Though there  
485 was a trend for the percentage of notch+ hearts to be higher in zfVEGFaa-injected  
486 larvae at 24 hpi (35.7% vs 17.9%), it did not reach statistical significance, nor was any  
487 difference observed at 48 hpi.

488

489 Treatment of zfVEGFaa-injected larvae with AG1478 failed to block the increase in the  
490 percentage of notch+ hearts. Furthermore, zfVEGFaa+AG1478 treated larvae had a  
491 substantially higher percentage of notch+ hearts at 48 hpi than those treated with  
492 zfVEGFaa alone (25.0% vs 0%). Together, these results show that VEGFaa is  
493 upstream of endocardial notch signalling and is that notch is unaffected by neuregulin-  
494 ErbB inhibition, excluding it from being downstream of the latter. Furthermore, the  
495 increased notch-signalling observed in zfVEGFaa+AG1478 hearts is highly suggestive

496 of negative-feedback, supporting the hypothesis that neuregulin might be downstream  
497 of notch as seen cardiac development.

498

499 Next, we sought to confirm if these signals interacted in a similar manner following  
500 injury; in particular whether injury alone could induce the same patterns of signalling.  
501 The experiment was repeated, substituting zfVEGFaa injection with laser injury (Figure  
502 8e). As with zfVEGFaa injection, laser injury also increased the percentage of hearts  
503 with notch+ endocardium but this occurred later, at 48 hpi (50.0% vs 11.1%) (Figure  
504 8f & 8g). Furthermore, there was also a strong trend for increased percentage of  
505 notch+ hearts in injured hearts relative to uninjured hearts at 24 hpi. Similar to  
506 zfVEGFaa injection, AG1478 did not block notch signalling, rather it seemed to  
507 enhance it. Whilst the percentage of notch+ hearts in the injured group did not  
508 significantly increase by 24 hpi, injured+AG1478 treated larvae did significantly  
509 increase relative to uninjured larvae (52.9% vs 11.1%). Furthermore, there was a trend  
510 for a greater percentage of notch+ hearts in injured+AG1478 treated larvae at 48 hpi  
511 compared to injured larvae alone (61.1% vs 50.0%). Taken together, these results  
512 demonstrate that endocardial notch signalling is downstream of cardiac injury and  
513 VEGFaa but is not downstream of Nrg-ErbB signalling, suggesting the latter is likely  
514 operating downstream of notch.

515

### 516 **Regenerating larval hearts resolve inflammation and enter a reparative stage by** 517 **48 hpi**

518

519 To understand what transcriptional changes are still occurring by the final timepoint of  
520 our model, we performed bulk RNAseq on pooled uninjured and injured larval hearts  
521 at 48 hpi (Figure 9a). We found a total of 1,464 differentially expressed ( $\log_2$  fold  
522 change  $>1$ ) genes, 418 were upregulated in injured and 1,046 downregulated in  
523 injured hearts. We did not observe differential expression of canonical markers of  
524 proliferation such as MCM2, mKi67 and PCNA suggesting that the proliferation we  
525 observe from 24 hpi is concluded by 48 hpi (Figure 9b). In agreement with this, gene  
526 ontology analysis indicated categories such as growth factors and cell proliferation not  
527 to be enriched at 48 hpi (Supplementary Figure 9e). Although not differentially  
528 expressed at 48 hpi, many of the ligands and cognate receptors for VEGF, Nrg-ErbB



529 and notch were highly expressed in both uninjured and injured hearts indicating that  
530 these pathways are active in the larval heart (Supplementary table 1).

531

532 Most inflammatory and M1 markers were either not differentially expressed or  
533 downregulated in injured hearts, such as Il1b (Figure 9b & Supplementary file 1). In  
534 contrast, we found injury-associated upregulation of 39 collagen isoforms, and several  
535 profibrotic genes such as *tgfb1a*, osteopontin and markers of epithelial to  
536 mesenchymal transition (EMT) such as vimentin and *twist2-3*. Similarly, hierarchical  
537 clustering of differentially expressed genes revealed 9 distinct clusters with Cluster 1  
538 being upregulated in injured hearts and enriched in collagens, matrix metalloproteins  
539 (MMPs) and fibroblast growth factors (FGFs) (Figure 9c, Supplementary file 2).  
540 Additionally, Cluster 2 contained several EMT genes, Cluster 8 genes relating to cell  
541 recruitment and lymphangiogenesis whilst Cluster 7 contained several embryonic-  
542 associated myosins and myosin binding proteins such as *myl10*, *myl13* and *cald1b*.  
543 Clusters 3-6 & 9 were downregulated in injury, Cluster 2 was enriched for immune  
544 genes and Clusters 4 and 6 for growth factors, with Clusters 3 and 5 less easily  
545 described.

546

547 Taken together, our RNAseq results suggest that the inflammatory and proliferative  
548 stages are largely concluded by 48 hpi and that a pro-resolving, reparative and  
549 remodelling phase dominates from this timepoint.

550

## 551 **Discussion**

552

553 In this study we present a detailed characterisation of the larval zebrafish model of  
554 heart regeneration, demonstrating the heterogeneity and plasticity of macrophages in  
555 cardiac injury and testing the requirement of macrophages for the removal of apoptotic  
556 cells, cardiomyocyte proliferation, epicardial activation and recovery of cardiac  
557 structure and function. Furthermore, we demonstrate the utility of the larval cardiac  
558 injury model by taking advantage of its *in vivo* cardiac imaging opportunities and  
559 amenability to pharmacological intervention to suggest a novel role for macrophages  
560 in driving cardiomyocyte proliferation via epicardial activation.

561

562 Recent zebrafish studies examining macrophages in other wound contexts, such as  
563 spinal cord and tail transection, have demonstrated  $\text{tnf-}\alpha$  to mark M1-like  
564 macrophages, that then transition to M2-like macrophages<sup>18,30,65</sup>. Similarly, studies in  
565 the adult zebrafish heart have shown the presence of a subsets stratified on the basis  
566 of  $\text{tnf-}\alpha$ ,  $\text{wt1b}$ ,  $\text{csf1ra}$  and  $\text{mpeg1}$  transgenic reporter expression<sup>29,34</sup>. We confirmed  
567 the presence of  $\text{mpeg1+csf1ra+}$  and  $\text{mpeg1+csf1ra-}$  subsets in larval heart injury,  
568 finding as in adults that these cells have identical recruitment dynamics and no obvious  
569 differences in morphology or behaviour<sup>34</sup>. Recent Cre-Lox lineage tracing has shown  
570 that  $\text{mpeg1+csf1ra-}$  cells have a non-haematopoietic origin, are  $\text{csfr1a}$ -independent  
571 developmentally and unlike  $\text{mpeg1+csf1ra+}$  cells, are not phagocytic<sup>66,67</sup>. Due to their  
572 non-haematopoietic origin some have termed  $\text{mpeg1+csf1ra-}$  cells as ‘metaphocytes’  
573 rather than macrophages however macrophage ontogeny is diverse and environment  
574 is known to play a leading role in establishing macrophage identity<sup>27,68</sup>. Therefore,  
575 further functional analysis and transcriptomic clustering relative to other immune cells  
576 is required to classify  $\text{mpeg1+csf1ra-}$  macrophages as a non-macrophage cell type.

577

578 Our observation of a transient  $\text{tnf}\alpha+$  subpopulation is in agreement with findings in the  
579 adult cryoinjury and larval tail-transection models<sup>30,34</sup>. Our success in increasing the  
580 percentage of  $\text{tnf-}\alpha+$  macrophages by canonical M1-polarising cytokine  $\text{IFN-}\gamma$ -rel  
581 suggests that early  $\text{tnf-}\alpha+$  macrophages are proinflammatory. Furthermore, we used  
582 heart synchronised live imaging to show that macrophages can convert from  
583  $\text{mpeg1+tnf-}\alpha-$  to  $\text{mpeg1+tnf-}\alpha+$ . This is the first time that macrophages have been  
584 imaged converting phenotype in the heart and provides direct evidence of plasticity as  
585 opposed to recruitment of heterogenous subsets. Our RNAseq data confirmed the  
586 inflammatory response to be transient as by 48 hpi hearts downregulate inflammatory  
587 cytokines and growth factors but upregulate collagens and reparative cytokines. Our  
588 finding that the a fibrotic program is activated in injured hearts despite full structural  
589 and functional recovery is in agreement with a recent study showing the scar-deficient  
590  $\text{runx1-/-}$  zebrafish to undergo successful cardiac regeneration<sup>69</sup>. It might be that the  
591 fibrotic program is concomitantly activated upon the resolution of inflammation.

592

593 We used two separate methods to examine the effect of removing macrophages from  
594 the larval heart injury model. By using two methods we hoped to control for potential

595 artefacts of the techniques. Cell death data acquired by either technique demonstrated  
596 that macrophages are required for the removal of apoptotic cells following injury.  
597 Furthermore, we found that the structure of laser lesions was analogous to that of  
598 human infarcts and adult zebrafish cryoinjury with a necrotic core surrounded by  
599 apoptotic cardiomyocytes and border zone<sup>6,37</sup>. Interestingly, these cells do eventually  
600 seem to be cleared even in the absence of macrophages. Our live imaging showed  
601 that dead cardiomyocytes can be expelled from the myocardium independently of  
602 macrophages. It is possible that this is a mechanical consequence of cardiac  
603 contraction however a similar phenomenon is known to occur in neuroepithelium  
604 where neurons appear to extrude apoptotic cells out of tissue<sup>70,71</sup>. Nevertheless, we  
605 were also able to image, for the first time, macrophages actively removing and  
606 internalising myocardial material following cardiac injury.

607

608 Surprisingly, we found that the absence of macrophages in neither macrophage-less  
609 model had any effect on the structural or functional recovery of the injured larval heart.  
610 This is in contrast to previous studies in mice where macrophage depletion leads to a  
611 reduced ejection and infarct expansion<sup>23,72,73</sup>. Likewise, liposomal clodronate  
612 macrophage ablation and CCR2-antagonist inhibition of macrophage recruitment in  
613 regenerative neonatal mice, zebrafish and axolotl hearts causes blocked or delayed  
614 resolution of the infarct area<sup>15,16,74</sup>. The contrasting results in the larval heart might  
615 simply be a consequence of its small size and low transmural pressure. Furthermore,  
616 the diameter of the infarct is only 1-2 cells, allowing surviving bordering  
617 cardiomyocytes to restore the myocardial syncytium without prior proliferation. Indeed,  
618 we observed individual cardiomyocytes extending protrusions into the lesion. Previous  
619 histological analysis of the border zone in injured adult zebrafish and neonatal mouse  
620 hearts has shown cardiomyocytes exhibiting a similar mesenchymal phenotype  
621 following partial dedifferentiation and disassembly of sarcomeres.<sup>75-77</sup>. To our  
622 knowledge, this is the first time this behaviour has verified directly by time-lapse  
623 imaging live in a beating heart.

624

625 Studies in adult zebrafish and neonatal mice have shown ablation of macrophages to  
626 decrease cardiomyocyte proliferation, the exception being axolotls where it has no  
627 effect<sup>15,17,40,78,79</sup>. Additionally, cardiomyocyte proliferation and macrophage  
628 recruitment dynamics correlate and enhancement of macrophage recruitment in the

629 non-regenerative teleost medaka, facilitates cardiomyocyte proliferation and  
630 regeneration<sup>17,78</sup>. However, early revascularisation is critical for cardiomyocyte  
631 proliferation and is macrophage-dependent calling into question whether  
632 macrophages directly induce cardiomyocyte proliferation<sup>17,80</sup>. Our larval model  
633 provided a unique opportunity to uncouple the angiogenic actions of macrophages  
634 from cardiomyocyte proliferation since larval hearts do not have supporting  
635 vasculature at this stage<sup>32</sup>. The increased proliferation we observed following injury  
636 demonstrates that larval hearts are truly regenerating and not recovering via normal  
637 developmental growth. Furthermore, macrophage ablation completely abolished the  
638 injury-dependent cardiomyocyte proliferation seen in macrophage replete hearts,  
639 suggesting this effect is might not be entirely mediated by revascularisation in other  
640 models. Interestingly, *irf8*<sup>-/-</sup> larvae still exhibit a robust proliferative response to injury.  
641 In line with previous studies, we found that *irf8*<sup>-/-</sup> and not macrophage-ablated larvae  
642 showed increased recruitment of neutrophils<sup>18,33</sup>. Pharmacological inhibition of  
643 neutrophil recruitment abolished expansion of cardiomyocyte number suggesting that  
644 large neutrophil response can compensate for the absence of macrophages.

645

646 Zebrafish macrophages have been shown to upregulate VEGFaa following injury of  
647 trunk intersegmental vessels and VEGFaa has also been shown to be a powerful  
648 mitogen for cardiomyocytes in adult cryoinjury<sup>21,41</sup>. However, macrophages were not  
649 VEGFaa<sup>+</sup> in the *vegfaa*:GFP reporter line. We instead found that VEGFaa is  
650 constitutively expressed in larval epicardium<sup>41,81</sup>. Pharmacological inhibition of  
651 VEGFR signalling decreased cardiomyocyte proliferation in uninjured larvae and in  
652 injured larvae who show an increase in expression of VEGFaa. This provides a  
653 mechanism for epicardial driven cardiomyocyte proliferation. Confirming this, a single  
654 intravenous injection of recombinant zfVEGFaa substantially increased the number of  
655 cardiomyocytes in hearts at 24 hpt. Interestingly, control hearts appear to match this  
656 increase by 48 hpt. It is possible that endogenous VEGFaa is therefore acting as a  
657 trigger to cardiomyocytes competent to divide and that injection of zfVEGFaa triggered  
658 the majority of these competent cardiomyocytes to divide ahead of developmental  
659 schedule.

660

661 Although macrophages do not express VEGFaa themselves following cardiac injury,  
662 their presence appears to be required for injury-dependent upregulation of mitogen

663 VEGFaa via the expansion of the epicardium. Furthermore, we showed that  
664 macrophages specifically home to the myocardial-epicardial niche. This is reminiscent  
665 of previous findings in developing and injured mouse hearts where yolk-derived and  
666 Gata6<sup>+</sup> pericardial cavity macrophages are recruited to the epicardium,  
667 respectively<sup>82,83</sup>. Future studies should seek to identify precisely how macrophages  
668 activate epicardium. Given we found that elevated neutrophil recruitment can induce  
669 cardiomyocyte proliferation in the absence of macrophages, epicardial activation  
670 might be induced by a shared inflammatory factor.

671

672 We showed both notch and Nrg-ErbB signalling to be required for expansion of  
673 cardiomyocyte numbers in both uninjured and injured heart. This is in agreement with  
674 previous findings in adult zebrafish and murine models<sup>46–48,51,58</sup>. Interestingly, our data  
675 demonstrated that both VEGFaa and injury increase endocardial notch signalling.  
676 Endocardial notch1b is known to regulate maturation of the larval ventricle via  
677 downstream Nrg1<sup>49</sup>. Therefore, it was plausible that a VEGF>Notch>Nrg-ErbB  
678 pathway might be inducing cardiomyocyte proliferation in the larval cardiac injury  
679 model. A recent paper published during the course of this study demonstrated  
680 exogenous VEGF to be capable of inducing cardiomyocyte hypertrophy in the mouse  
681 heart via a VEGF>notch>nrg1 pathway<sup>43</sup>. Whilst unconfirmed in models of MI, it raises  
682 the possibility that this could represent an injury-dependent recapitulation of  
683 developmental growth programming, conserved between regenerative and non-  
684 regenerative animals. Given the angiogenic effects of VEGFaa, our proposed pathway  
685 would present an elegant coupling revascularisation to myocardial growth, under the  
686 control of macrophage inflammation. Future studies are required to determine if this  
687 pathway is similarly active in adult zebrafish and mammalian hearts and understand  
688 precisely how macrophages are inducing upstream epicardial activation.

689

690

## 691 **Materials and Methods**

692

### 693 **Zebrafish husbandry and lines used**

694

695 Zebrafish husbandry and maintenance was conducted as per standard operating  
696 procedures, in accordance with the Animals (Scientific Procedures) Act, 1986 and

697 approved by The University of Edinburgh Animal Welfare and Ethical Review Board in  
698 a United Kingdom Home Office-approved establishment. All our experiments were  
699 performed on staged zebrafish aged between 3 dpf and 5 dpf<sup>84</sup>. The following  
700 transgenic and mutant lines were used: *Tg(myl7:eGFP)<sup>twu26</sup>*<sup>85</sup>, *Tg(mpx:mCherry)<sup>uwm7</sup>*  
701 <sup>86</sup>, *Tg(mpeg1:mCherry)<sup>gl23</sup>*<sup>87</sup>, *Tg(mpeg1:eGFP)<sup>gl22</sup>*<sup>87</sup>, (*Tg(mpx:GFP)*<sup>i114</sup><sup>88</sup>,  
702 *Tg(myl7:h2b-GFP)<sup>zf52</sup>*<sup>89</sup>, *Tg(myl7:mKateCAAX)<sup>SD11</sup>*<sup>90</sup>, *Tg(fms:Gal4.VP16)<sup>i186</sup>*,  
703 referred to as *csfr1a:gal4*<sup>91</sup>, *Tg(UAS-E1b:NfsB-mCherry)<sup>c264</sup>* abbreviated to  
704 *UAS:NfsB-mCherry*<sup>92</sup>, *Tg(vegfaa:eGFP)<sup>PD260</sup>*<sup>41</sup>, *Tg(myl7:nlsDsRed)<sup>f2</sup>*<sup>93</sup>  
705 *Tg(TNFa:eGFP)<sup>sa43296</sup>*<sup>30</sup>, *Tg(Tp1:venus-PEST)<sup>S940</sup>*<sup>94</sup>, *Tg(kdrl:hsa.HRAS-*  
706 *mCherry)<sup>S896</sup>*<sup>95</sup>, *Tg(kdrl:GFP)<sup>la116</sup>*<sup>96</sup>, *Tg(tcf21:DsRed)<sup>PD37</sup>*<sup>97</sup>,  
707 *Tg(myl7:gal4:myl7:GFP)<sup>cbg2Tg</sup>*<sup>98</sup>, *Tg(UAS:mRFP)<sup>99</sup>* and *irf8<sup>st95/st95</sup>*<sup>33</sup> referred to as *irf8-*  
708 */-*. Adults were day-crossed as appropriate to yield desired combinations of transgenes  
709 in embryos. Embryos were treated with 0.003% phenylthiourea (Fisher Scientific) at 7  
710 hpf to prevent pigment formation and therefore enhance image clarity<sup>100</sup>. Embryos and  
711 larvae were incubated at 28.5°C in conditioned media/water (6.4 mM KCl, 0.22 mM  
712 NaCl, 0.33 mM CaCl<sub>2</sub>·2H<sub>2</sub>O, 0.33 mM MgSO<sub>4</sub>·7H<sub>2</sub>O) + 0.1% methylene blue (w/v)  
713 and imaged at room temperature (23°C) using epifluorescence or light sheet  
714 fluorescence microscopy (details below). When necessary, larvae were anesthetized  
715 using 40 µg/ml tricaine methanesulfonate (Sigma Aldrich) in conditioned media.

716

### 717 **Cardiac laser injury**

718

719 A Zeiss Photo Activated Laser Microdissection (PALM) laser system (Zeiss) was used  
720 to precisely cause a localised injury at the ventricular apex of anesthetized 72 hpf  
721 larvae<sup>32</sup>. Larvae were mounted on a glass slide in 20 µl anesthetized conditioned  
722 media and lasered via a 20X objective. Injuries were deemed successful and complete  
723 once ventricular contractility decreased, the apex had shrunk, and the myocardial wall  
724 had swollen without causing cardiac rupture and subsequent bleeding. A successful  
725 cardiac injury results in the portion of dysfunctional tissue losing fluorescent  
726 myocardial transgenic fluorescence signal. Uninjured larvae were treated in the same  
727 manner up to the point of laser injury, when they were individually transferred into  
728 single wells of a 24-well plate and maintained in the same environmental conditions  
729 as injured fish.

730

## 731 **Epifluorescence microscopy**

732

733 Larvae were mounted laterally in conditioned media on a glass slide and imaged using  
734 a Leica M205 FA stereomicroscope with GFP and mCherry filters. For all serial  
735 timepoint epifluorescence imaging experiments, number of immune cells on the heart  
736 were quantified by manually observing and counting cells moving synchronously with  
737 the beating heart. Heart images were acquired using 16X objective. The number of  
738 immune cells at the tail were quantified by counting from the caudal end of the vascular  
739 loop to the wound edge as performed by others<sup>32,101</sup>. Tail images were acquired using  
740 8X objective. CHT and trunk vasculature images were acquired using a 6X objective.  
741 Whole larva images were acquired using 2.5X objective.

742

## 743 **Heart-synchronised light-sheet microscopy**

744

745 Individual larvae were prepared for light sheet fluorescence microscopy (LSFM) by  
746 embedding in 1% low melting-point agarose (ThermoFisher) in anesthetized  
747 conditioned media inside FEP tubes (Adtech Polymer Engineering). Agar embedding  
748 prevents gradual drift of the embryo in the FEP tube, without causing developmental  
749 perturbations during long-term imaging. Larvae were used only once for a timelapse  
750 imaging experiment, and any repeats shown come from distinct individuals. Larvae  
751 were mounted head down such that the heart faces toward both illumination and  
752 imaging objectives to improve image clarity. All LSFM experiments were performed at  
753 room temperature (23°C). Exposures ranged from 5-15 ms and frequency of scans  
754 were 3-5 minutes. Brightfield images acquired at 80 fps were used to inform the optical  
755 gating and acquire z slices in a set phase of cardiac contraction, usually mid diastole.  
756 The setup of our custom-built LSFM system has been previously reported in detail<sup>38</sup>.

757

## 758 **Metronidazole-nitroreductase macrophage ablation model**

759

760 In order to selectively ablate macrophages prior to cardiac injury, embryos were  
761 treated incubated as previously described until 48 hpf and then treated as follows.  
762 Embryos were carefully dechorionated at 48 hpf and screened based on fluorescence  
763 and split into groups appropriate to the experiment, for example larvae were always  
764 split into *csf1ra:gal4;UAS:NfsB-mCherry+* and *csf1ra:gal4;UAS:NfsB-mCherry-*.

765 Embryos were then transferred to either conditioned water or a 0.5mM metronidazole  
766 (Thermo Fisher Scientific) solution, both solutions also contained 0.003%  
767 phenylthiourea (Thermo Fisher Scientific) and 0.2% DMSO (Sigma Aldrich). Larvae  
768 were then incubated in these solutions in the dark at 28.5°C for 24 hours prior to injury  
769 at 72 hpf. Larvae were then removed from the metronidazole solution and vehicle  
770 solution and placed in fresh conditioned water + 0.003% phenylthiourea for the  
771 remainder of the experiment. As shown in Figure 2 and Supplementary Figure 2, this  
772 is sufficient to ablate macrophages prior to injury and completely block subsequent  
773 macrophage recruitment to the injured heart.

774

### 775 **Neutral red staining**

776

777 Larvae were incubated at 72 hpf in 5µg/mL neutral red in conditioned water for 5 hours  
778 in the dark at 28.5°C. Larvae were then washed twice for 5 minutes in conditioned  
779 water, anaesthetised with 40 µg/ml tricaine methanesulfonate and imaged by  
780 brightfield microscopy on a Leica M205 FA stereomicroscope.

781

### 782 **Genotyping of *irf8*<sup>-/-</sup> mutants**

783

784 Adult (>30 dpf) zebrafish arising from heterozygous *irf8* mutant incrosses were  
785 anaesthetised in 40 µg/ml tricaine methanesulfonate and a lobe of caudal fin removed  
786 by scalpel. After clipping, fins were digested to extract DNA using 10mg/ml Prot K,  
787 incubated at 65°C for 1 hr. This incubation ends with 15 minutes at 95°C to denature  
788 the Proteinase K. A section of *irf8* flanking the mutation locus was then amplified from  
789 the extracted DNA by PCR using Forward -ACATAAGGCGTAGAGATTGGACG and  
790 Reverse -GAAACATAGTGCGGTCCTCATCC primers and REDTaq® ReadyMix™  
791 PCR Reaction Mix. The PCR product was then digested for 30 mins at 37 °C using  
792 AVA1 restriction enzyme (New England Bioscience) and the product run on a 2%  
793 agarose gel. WT = Aval digest site is present = PCR product is cleaved to give two  
794 bands with sizes of approximately 200 and 100 bp. *irf8*<sup>-/-</sup> = Aval digest site is absent  
795 due to mutation = PCR product is not cut. A single band is observed with a size of 286  
796 bp. *irf8*<sup>+/-</sup> = Three bands as above.

797

### 798 **Microinjection recombinant proteins and intravital stains**



799

800 Microinjections were performed on larvae at 72 hpf using a Narishige IM-300  
801 Microinjector and pulled thin wall glass capillaries (Harvard Apparatus), administered  
802 under anaesthesia by intravenous microinjection through the cardiac sinus venosus  
803 (SV) that drains the common cardinal vein (CCV). An injection volume of 1 nL was  
804 used for all intravenous injections to minimise disruption to blood volume.

805

806 For propidium iodide intravital staining, 1nL 100µg/ml propidium iodide in DPBS was  
807 injected immediately following injury at 0.5 hpi. Larvae were then immediately imaged  
808 by heart synchronised light-sheet microscopy at 1 hpi. Injection of recombinant zIFN-  
809  $\gamma$ -rel (IFN-1.1) (Kingfisher Bioscience) was administered as a single 1nL 132nM dose  
810 at 72 hpf. Lyophilised IFN-  $\gamma$ -rel was reconstituted in PBS + 0.1% BSA (carrier protein)  
811 and PBS + 0.1% BSA was used as the vehicle control solution. Injections of  
812 recombinant zfVEGFaa (Kingfisher Bioscience) were administered as single 1nL 0.25  
813 ug/ul doses at 72 hpf (protein reconstituted as above).

814

### 815 **Trunk laser injury and neovascularisation**

816

817 A Zeiss Photo Activated Laser Microdissection (PALM) laser system (Zeiss,  
818 Oberkochen, Germany) was used to precisely cause a localised injury to the skeletal  
819 muscle segment directly dorsal to the posterior end of the cloaca in anesthetized 72  
820 hpf larvae. Care was taken not to damage the intersegmental vessels. Muscle can  
821 seen to be successfully injured by disruption of its usually smooth striated appearance  
822 via monitoring in brightfield. Additionally, successfully injured larvae will be paralysed  
823 for approximately 24 hpi due to the proximity of the spinal cord. Uninjured larvae were  
824 treated in the same manner up to the point of laser injury, when they were individually  
825 transferred into single wells of a 24-well plate and maintained in the same  
826 environmental conditions as injured fish. Larvae were then incubated until 48 hpi  
827 28.5°C in conditioned media/water + 0.1% methylene blue + (W/V) 0.003%  
828 phenylthiourea (Thermo Fisher Scientific) and imaged at room temperature (23°C)  
829 using epifluorescence. At 48 hpi, neovasculature can be visualised by *kdrl:GFP*  
830 fluorescence to have invaded the injured skeletal muscle in a portion of injured larvae.  
831 The total length of the neovascular network can be quantified post-acquisitionally by  
832 image analysis in FIJI (National Institutes of Health).

833

### 834 **Tail fin transection injury**

835

836 The tail/caudal fin of anesthetized 72 hpf larvae was transected using a sterile scalpel,  
837 avoiding damage to the end of the notochord and vasculature and as previously  
838 reported<sup>102</sup>. Uninjured (control) fish were treated in the same manner up to the point  
839 of transection, when they were separated into a 24-well plate and maintained in the  
840 same environmental conditions as injured fish.

841

### 842 **Histological staining**

843

844 To detect cell death at the injured ventricle, whole-mount larval TUNEL staining was  
845 performed. Larvae were fixed in 4% PFA for 30 mins and transferred to 1:10 dilution  
846 of PBS. Larvae were subsequently digested in 1 µg/ml Proteinase K for 1 h. Larvae  
847 were re-fixed in 4% PFA for 20 mins and subsequently washed in PBT. TUNEL  
848 staining was performed using ApopTag Red In situ kit (MilliporeSigma) to label  
849 apoptotic cells, as described previously<sup>32</sup>. Stained hearts were imaged using LSMF.

850

851 EdU staining was performed by incubating larvae in 1mM EdU (5-ethynyl-2'-  
852 deoxyuridine) (Abcam) in 1 % DMSO (Sigma Aldrich) in conditioned water + 0.003%  
853 phenylthiourea (Thermo Fisher Scientific) for 24 hours beginning either at 0 hpi or 24  
854 hpi depending on the experiment. Larvae were incubated at 28.5°C in the dark. Larvae  
855 were then fixed for 2 hours at room temperature in 4% PFA, permeabilised in  
856 permeabilisation solution (PBS-Triton-X 0.1% + 1% Tween + 1% DMSO) and  
857 pericardium punctured using a glass microinjection needle (further improving  
858 permeability). Larvae were then washed twice in PBS-3% BSA and incubated for 2  
859 hours at room temperature in CLICK reaction mixture from Click-iT™ EdU Imaging Kit  
860 with Alexa Fluor™ 594 (Invitrogen) made according to manufacturers' instructions.  
861 Larvae were finally washed once in PBS-3%BSA and twice in PBS-0.1% tween and  
862 imaged by LSMF.

863

### 864 **Heart lesion size quantification**

865

866 Larval hearts expressing the transgene *myl7:GFP* were imaged by heart-synchronised  
867 light-sheet imaging as described above. Exposure was kept consistent at 10ms as well  
868 as z slice spacing (1  $\mu\text{m}$ ) and heart contraction phase was locked to mid diastole for  
869 all larvae. Z stacks were surface rendered in IMARIS (Bitplane) based on absolute  
870 intensity and software-suggested segmentation and rendering parameters. Lesion  
871 area, visualised as a render-free hole in the myocardium, was then traced around  
872 manually and lesion area quantified in FIJI (National Institutes of Health).

873

#### 874 **Ventricular ejection fraction analysis**

875

876 Larval hearts of *Tg(myl7:GFP)* larvae were imaged at 80 fps in brightfield using a Leica  
877 M205 FA epifluorescence stereomicroscope to capture when the ventricle was in  
878 diastole and systole. The ventricular area in diastole and systole was measured  
879 manually in FIJI and ventricular ejection fraction calculated using the formula  $100 \times$   
880  $[(\text{Diastolic Area} - \text{Systolic Area})/\text{Diastolic Area}]^{31}$ . Ventricular ejection fraction by area  
881 was then converted to ejection fraction by volume using the formula 'Ejection fraction  
882 by area  $\times 2.33 =$  Ejection fraction by volume' derived in Supplementary Figure 4. Over  
883 the small range of ejection fractions that occur in larval hearts, the relationship can be  
884 considered to approximate to a linear one.

885

#### 886 **Quantification of cell number by image analysis**

887

888 To quantify the number of cardiomyocytes in *Tg(myl7:h2b-GFP)* and  
889 *Tg(myl7:nlsDsRed)* larval hearts z stacks of hearts acquired by LSM were imported  
890 into FIJI and nuclei counted by the plugin Trackmate. Briefly, key segmentation  
891 parameters 'Estimated blob diameter'=5.5, 'Threshold'=0.9 were taken as a starting  
892 point and optimised manually per experiment until all nuclei are counted successfully.  
893 The heart atrium is excluded manually by x coordinate filtering and ventricular  
894 cardiomyocytes are then automatically by the plug in.

895

896 In order to automatically quantify the percentage of EdU+ ventricular cardiomyocytes  
897 in *Tg(myl7:h2b-GFP)* larval hearts a custom FIJI macro was written to exclude non-  
898 cardiomyocyte EdU signal. This is necessary as cardiomyocytes have a much lower  
899 turnover rate than surrounding cells in the pericardium, endocardium and blood and

900 so represent a minority of EdU+ cells. Briefly, the Bersen segmentation method was  
901 used to mask areas of GFP fluorescence per z slice and these masks subsequently  
902 applied as a crop ROI to EdU signal in the 564 (red) channel of RGB images. Slices  
903 were then reassembled and merged into maximum intensity projections where the FIJI  
904 Trackmate plugin was used to count both the total number of GFP+ cardiomyocyte  
905 nuclei and EdU+ cardiomyocyte nuclei. This quantification then allowed the  
906 percentage of EdU+ cardiomyocytes to be calculated in an unbiased way per larval  
907 heart.

908

909

### 910 **Quantification of notch signalling by image analysis**

911 In order to objectively identify whether the hearts from *Tg(Tp1:venus-PEST)* larvae  
912 possessed venus signal in the endocardium above that of background, and were  
913 therefore 'notch+', the following approach was used. Treatment groups were blinded  
914 to the analyser and z stacks opened in FIJI. The automatic brightness and contrast  
915 function was used to objectively enhance the signal in the heart and the clear interface  
916 between the granular autofluorescence of the chamber blood and the smooth  
917 autofluorescence of the myocardium searched for venus expression. The distinctive  
918 morphology and location of endothelium allowed for unambiguous identification of  
919 venus+ status.

920

921 For the quantification of the total myocardial *Tp:venus-PEST* fluorescence, z stacks  
922 were blinded and processed in FIJI. Stacks were converted to maximum intensity  
923 projections and a standardised size ROI was manually positioned over the notch<sup>high</sup>  
924 atrioventricular valve allowing it to be cropped out of the image and preventing it from  
925 interfering with myocardial signal. This is because during development it exhibits  
926 exceptionally high *Tp1:venus-PEST* fluorescence, unlike the endocardium whose  
927 fluorescence is negligible relative to the myocardium. Ventricles were then manually  
928 traced, avoiding the bulbous arteriosus as it is similarly notch<sup>high</sup> during development  
929 and fluorescence summed. Fluorescence was then normalised by subtracting  
930 background fluorescence of venus-negative larvae imaged similarly.

931

### 932 **Pharmacological inhibition of larval signalling**

933

934 To inhibit VEGF signalling larvae were bathed in pan-VEGFR antagonist  
935 AV951/Tivozanib (Stratex Scientific) 0-48 hpi. AV951 was dissolved in 0.1% DMSO  
936 in conditioned water + 0.003% phenylthiourea to make a 10nM solution, with just 0.1%  
937 DMSO in conditioned water + 0.003% phenylthiourea becoming the vehicle control. In  
938 order to pulse larvae with EdU, the original solution was replaced the same solution  
939 was except for the addition of 1mM EdU at 1% DMSO.

940

941 To inhibit notch signalling, larvae were bathed in gamma secretase inhibitor DAPT  
942 (Cambridge Bioscience) 0-48 hpi. DAPT was dissolved in 0.2% DMSO in conditioned  
943 water + 0.003% phenylthiourea to make a 100µM solution, with just 0.2% DMSO in  
944 conditioned water + 0.003% phenylthiourea becoming the vehicle control. Note, DAPT  
945 must be dissolved in DMSO prior to the addition of water to prevent precipitation.

946

947 In order to inhibit neuregulin-ERBB signalling, the ErBB2 antagonist AG1478 was  
948 used. Larvae were bathed in 1.75 µM AG1478 (Cambridge Bioscience) dissolved in  
949 0.25% DMSO in conditioned water + 0.003% phenylthiourea over 0-48 hpi.

950

#### 951 **Extraction of larval hearts and RNA extraction**

952

953 Following laser injury at 72 hpf *Tg(myl7:gal4::GFP;UAS:mRFP)* larvae were incubated  
954 at 28.5°C in conditioned media/water + 0.1% methylene blue (w/v) + 0.003%  
955 phenylthiourea. At 48 hpi uninjured and injured larvae were given an overdose of  
956 tricaine at 400 µg/ml, following which hearts were extracted. We adapted the protocol  
957 of Burns and MacRae<sup>103</sup> to increase the yield of heart retrieval from ~50% to ~70%.  
958 Briefly, ~30 larvae were placed in 2mL eppendorf tubes, the conditioned water drained  
959 and replaced with ice cold Leibovitz's L-15 Medium supplemented with 10% FCS. A  
960 19-gauge needle coupled to a 5mL syringe was used to shear the larvae by aspiration  
961 and therefore dissociate hearts from the rest of the larva. The lysate was then  
962 inspected by epifluorescence microscopy and mRFP+ hearts and collected to be kept  
963 on ice. Hearts were then digested at for 10 minutes at 4°C in protease solution (5 mM  
964 CaCl<sub>2</sub>, 10 mg/ml B. Licheniformis protease, 125 U/mL DNase I in 1x PBS) with  
965 occasional aspiration to aid digestion (Truong et al.). RNA was then extracted using a  
966 RNeasy Plus Micro Kit (Qiagen) following direct lysis with RLT lysis buffer according

967 to manufacturer's instructions. RNA concentration was measured by Qubit and  
968 integrity by Bioanalyser. RIN score for all samples ranged between 9.6-10.

969

## 970 **RNAseq analysis**

971

972 RNA was sequenced by Genewiz, Leipzig, Germany by Illumina NovaSeq, PE  
973 2x150. Genewiz also used `eseq2` package was used in R to evaluate sequencing  
974 quality, trim reads, map to the *Danio rerio* genome and generate gene counts/hits.  
975 Sequence reads were trimmed using Trimmomatic v.0.36. The trimmed reads were  
976 mapped to the Danio rerio GRCz10.89 reference genome available on ENSEMBL  
977 using the STAR aligner v.2.5.2b. Unique gene hit counts were calculated by using  
978 `featureCounts` from the Subread package v.1.5.2. Only unique reads that fell within  
979 exon regions were counted. The Wald test was used to generate p-values and log<sub>2</sub>  
980 fold changes. A gene ontology analysis was performed on the statistically significant  
981 set of genes by implementing the software GeneSCF v.1.1-p2. The zfin GO list was  
982 used to cluster the set of genes based on their biological processes and determine  
983 their statistical significance. The volcano plot was generated by a custom R script  
984 and heatmap constructed using the `pHeatmap` package. For the heatmap z scaled  
985 log<sub>2</sub>(Reads) were clustered via Pearson correlation and clusters thresholded based  
986 on the resulting dendrogram. The heatmap was generated using the `pHeatmap`  
987 function in R.

988

989

990

991

992

## 993 **Statistics**

994

995 Graphs and statistics were curated in GraphPad Prism 9.1 software (GraphPad  
996 Software). Data were analyzed by student *t*-test, one-way ANOVA or two-way ANOVA  
997 followed by an appropriate multiple comparison *post hoc* test. All statistical tests, *p*-  
998 values and *n* numbers used are given in figure legends.

999

1000

1001 **Acknowledgments**

1002

1003

1004 This work was funded by a British Heart Foundation (BHF) CoRE award  
1005 (RE/13/3/30183), Medical Research Scotland studentship (PhD-1049-2016), NC3R  
1006 studentship (NC/P002196/1), BHF New Horizons grant (NH/14/2/31074), and a  
1007 Medical Research Council UK award (MR/K013386/1). Bioinformatics and RNAseq  
1008 performed by Genewiz, Leipzig, Germany. We also acknowledge Amelia  
1009 Edmondson-Stait, University of Edinburgh, for her advice and input on RNAseq  
1010 analysis.

1011

1012 **Author Contributions**

1013

1014 FAB conceived of and designed the study. FAB, AK and GM carried out all  
1015 experiments. Image analysis was performed by FB and AK. LSFM-related technical  
1016 assistance was provided by JMT. FAB wrote the manuscript. KRS, EGS and MB  
1017 provided expertise regarding all RNA work. KRS helped optimise larval heart  
1018 extraction and RNA extraction. JMT, CST, JJM, GM, MB, AGR, and MAD edited the  
1019 manuscript. MAD, AGR, and CST supervised the study. All authors contributed to  
1020 the article and approved the submitted version.

1021

1022 **References**

1023

- 1024 1. Ohnmacht, J., Yang, Y., Maurer, G. W., Barreiro-Iglesias, A., Tsarouchas, T.  
1025 M., Wehner, D., Sieger, D., Becker, C. G. & Becker, T. Spinal motor neurons  
1026 are regenerated after mechanical lesion and genetic ablation in larval  
1027 zebrafish. *Dev.* **143**, 1464–1474 (2016).
- 1028 2. Becker, C. G., Lieberoth, B. C., Morellini, F., Feldner, J., Becker, T. &  
1029 Schachner, M. L1.1 is involved in spinal cord regeneration in adult zebrafish. *J.*  
1030 *Neurosci.* **24**, 7837–7842 (2004).
- 1031 3. Bensimon-Brito, A., Ramkumar, S., Boezio, G. L. M., Guenther, S., Kuenne,  
1032 C., Helker, C. S. M., Sánchez-Iranzo, H., Iloska, D., Piesker, J., Pullamsetti, S.,  
1033 Mercader, N., Beis, D. & Stainier, D. Y. R. TGF- $\beta$  Signaling Promotes Tissue  
1034 Formation during Cardiac Valve Regeneration in Adult Zebrafish. *Dev. Cell* **0**,

- 1035 (2019).
- 1036 4. Sander, V., Davidson, A. J., Sander, V. & Davidson, A. J. Kidney Injury and  
1037 Regeneration in Zebrafish. *Semin. Nephrol.* **34**, 437–444 (2014).
- 1038 5. Basu Mallik, S., Jayashree, B. S. & Shenoy, R. R. Epigenetic modulation of  
1039 macrophage polarization- perspectives in diabetic wounds. *J. Diabetes*  
1040 *Complications* **0**, (2018).
- 1041 6. González-Rosa, J. M., Martín, V., Peralta, M., Torres, M. & Mercader, N.  
1042 Extensive scar formation and regression during heart regeneration after  
1043 cryoinjury in zebrafish. *Development* **138**, 1663–1674 (2011).
- 1044 7. Leuschner, F., Rauch, P. J., Ueno, T., Gorbатов, R., Marinelli, B., Lee, W. W.,  
1045 Dutta, P., Wei, Y., Robbins, C., Iwamoto, Y., Sena, B., Chudnovskiy, A.,  
1046 Panizzi, P., Keliher, E., Higgins, J. M., Libby, P., Moskowitz, M. A., Pittet, M. J.,  
1047 Swirski, F. K., Weissleder, R. & Nahrendorf, M. Rapid monocyte kinetics in  
1048 acute myocardial infarction are sustained by extramedullary monocytopoiesis.  
1049 *J. Exp. Med.* **209**, 123–37 (2012).
- 1050 8. Murry, C. E., Reinecke, H. & Pabon, L. M. Regeneration Gaps. Observations  
1051 on Stem Cells and Cardiac Repair. *Journal of the American College of*  
1052 *Cardiology* vol. 47 1777–1785 (2006).
- 1053 9. Bergmann, O., Zdunek, S., Felker, A., Salehpour, M., Alkass, K., Bernard, S.,  
1054 Sjostrom, S. L., Szewczykowska, M., Jackowska, T., dos Remedios, C., Malm,  
1055 T., Andrä, M., Jashari, R., Nyengaard, J. R., Possnert, G., Jovinge, S., Druid,  
1056 H. & Frisén, J. Dynamics of Cell Generation and Turnover in the Human Heart.  
1057 *Cell* **161**, 1566–1575 (2015).
- 1058 10. Pfeffer, M. A. & Braunwald, E. Ventricular remodeling after myocardial  
1059 infarction. Experimental observations and clinical implications. *Circulation* **81**,  
1060 1161–72 (1990).
- 1061 11. Richardson, W. J., Clarke, S. A., Quinn, T. A. & Holmes, J. W. Physiological  
1062 Implications of Myocardial Scar Structure. *Compr. Physiol.* **5**, 1877–909  
1063 (2015).
- 1064 12. Jopling, C., Sleep, E., Raya, M., Martí, M., Raya, A. & Belmonte, J. C. I.  
1065 Zebrafish heart regeneration occurs by cardiomyocyte dedifferentiation and  
1066 proliferation. *Nature* **464**, 606–609 (2010).
- 1067 13. Kikuchi, K., Holdway, J. E., Werdich, A. A., Anderson, R. M., Fang, Y.,  
1068 Egnaczyk, G. F., Evans, T., MacRae, C. A., Stainier, D. Y. R. & Poss, K. D.



- 1069 Primary contribution to zebrafish heart regeneration by *gata4*+  
1070 cardiomyocytes. *Nature* **464**, 601–605 (2010).
- 1071 14. González-rosa, J. M., Martín, V., Peralta, M., Torres, M. & Mercader, N.  
1072 Extensive scar formation and regression during heart regeneration after  
1073 cryoinjury in zebrafish. **1674**, 1663–1674 (2011).
- 1074 15. Aurora, A. B., Porrello, E. R., Tan, W., Mahmoud, A. I., Hill, J. A., Bassel-duby,  
1075 R., Sadek, H. A. & Olson, E. N. Macrophages are required for neonatal heart  
1076 regeneration. **124**, (2014).
- 1077 16. Godwin, J. W., Debuque, R., Salimova, E. & Rosenthal, N. A. Heart  
1078 regeneration in the salamander relies on macrophage-mediated control of  
1079 fibroblast activation and the extracellular landscape. *npj Regen. Med.* **2**, 22  
1080 (2017).
- 1081 17. Lai, S.-L., Marín-Juez, R., Moura, P. L., Kuenne, C., Lai, J. K. H., Tsedeke, A.  
1082 T., Guenther, S., Looso, M. & Stainier, D. Y. Reciprocal analyses in zebrafish  
1083 and medaka reveal that harnessing the immune response promotes cardiac  
1084 regeneration. *Elife* **6**, (2017).
- 1085 18. Tsarouchas, T. M., Wehner, D., Cavone, L., Munir, T., Keatinge, M.,  
1086 Lambertus, M., Underhill, A., Barrett, T., Kassapis, E., Ogryzko, N., Feng, Y.,  
1087 van Ham, T. J., Becker, T. & Becker, C. G. Dynamic control of proinflammatory  
1088 cytokines *Il-1 $\beta$*  and *Tnf- $\alpha$*  by macrophages in zebrafish spinal cord  
1089 regeneration. *Nat. Commun.* **9**, 4670 (2018).
- 1090 19. Carrillo, S. A., Anguita-Salinas, C., Peña, O. A., Morales, R. A., Muñoz-  
1091 Sánchez, S., Muñoz-Montecinos, C., Paredes-Zúñiga, S., Tapia, K. & Allende,  
1092 M. L. Macrophage Recruitment Contributes to Regeneration of  
1093 Mechanosensory Hair Cells in the Zebrafish Lateral Line. *J. Cell. Biochem.*  
1094 **117**, 1880–1889 (2016).
- 1095 20. Puranik, A. S., Leaf, I. A., Jensen, M. A., Hedayat, A. F., Saad, A., Kim, K.-W.,  
1096 Saadalla, A. M., Woollard, J. R., Kashyap, S., Textor, S. C., Grande, J. P.,  
1097 Lerman, A., Simari, R. D., Randolph, G. J., Duffield, J. S. & Lerman, L. O.  
1098 Kidney-resident macrophages promote a proangiogenic environment in the  
1099 normal and chronically ischemic mouse kidney. *Sci. Rep.* **8**, 13948 (2018).
- 1100 21. Gurevich, D. B., Severn, C. E., Twomey, C., Greenhough, A., Cash, J., Toyé,  
1101 A. M., Mellor, H. & Martin, P. Live imaging of wound angiogenesis reveals  
1102 macrophage orchestrated vessel sprouting and regression. *EMBO J.* **37**,

- 1103 e97786 (2018).
- 1104 22. Herzog, C., Pons Garcia, L., Keatinge, M., Greenald, D., Moritz, C., Peri, F. &  
1105 Herrgen, L. Rapid clearance of cellular debris by microglia limits secondary  
1106 neuronal cell death after brain injury in vivo. *Development* **146**, dev174698  
1107 (2019).
- 1108 23. Nahrendorf, M., Swirski, F. K., Aikawa, E., Stangenberg, L., Wurdinger, T.,  
1109 Figueiredo, J.-L., Libby, P., Weissleder, R. & Pittet, M. J. The healing  
1110 myocardium sequentially mobilizes two monocyte subsets with divergent and  
1111 complementary functions. *J. Exp. Med.* **204**, 3037–3047 (2007).
- 1112 24. Sager, H. B., Hulsmans, M., Lavine, K. J., Moreira, M. B., Heidt, T., Courties,  
1113 G., Sun, Y., Iwamoto, Y., Tricot, B., Khan, O. F., Dahlman, J. E., Borodovsky,  
1114 A., Fitzgerald, K., Anderson, D. G., Weissleder, R., Libby, P., Swirski, F. K. &  
1115 Nahrendorf, M. Proliferation and Recruitment Contribute to Myocardial  
1116 Macrophage Expansion in Chronic Heart Failure. *Circ. Res.* **119**, 853–64  
1117 (2016).
- 1118 25. Panizzi, P., Swirski, F. K., Figueiredo, J. L., Waterman, P., Sosnovik, D. E.,  
1119 Aikawa, E., Libby, P., Pittet, M., Weissleder, R. & Nahrendorf, M. Impaired  
1120 Infarct Healing in Atherosclerotic Mice With Ly-6Chi Monocytosis. *J. Am. Coll.*  
1121 *Cardiol.* **55**, 1629–1638 (2010).
- 1122 26. Nahrendorf, M. & Swirski, F. K. Monocyte and Macrophage Heterogeneity in  
1123 the Heart. **02114**, 1624–1634 (2013).
- 1124 27. Lavin, Y., Winter, D., Blecher-Gonen, R., David, E., Keren-Shaul, H., Merad,  
1125 M., Jung, S. & Amit, I. Tissue-Resident Macrophage Enhancer Landscapes  
1126 Are Shaped by the Local Microenvironment. *Cell* **159**, 1312–1326 (2014).
- 1127 28. Xue, J., Schmidt, S. V, Sander, J., Draffehn, A., Krebs, W., Quester, I., Nardo,  
1128 D. De, Gohel, T. D., Emde, M., Schmidleithner, L., Ganesan, H., Nino-castro,  
1129 A., Mallmann, M. R., Labzin, L., Theis, H., Kraut, M., Beyer, M., Latz, E.,  
1130 Freeman, T. C., Ulas, T. & Schultze, J. L. Resource Transcriptome-Based  
1131 Network Analysis Reveals a Spectrum Model of Human Macrophage  
1132 Activation. *Immunity* **40**, 274–288 (2014).
- 1133 29. Sanz-Morejón, A., García-Redondo, A. B., Reuter, H., Marques, I. J., Bates,  
1134 T., Galardi-Castilla, M., Große, A., Manig, S., Langa, X., Ernst, A., Piragyte, I.,  
1135 Botos, M.-A., González-Rosa, J. M., Ruiz-Ortega, M., Briones, A. M., Salaices,  
1136 M., Englert, C. & Mercader, N. Wilms Tumor 1b Expression Defines a Pro-

- 1137 regenerative Macrophage Subtype and Is Required for Organ Regeneration in  
1138 the Zebrafish. *Cell Rep.* **28**, 1296-1306.e6 (2019).
- 1139 30. Nguyen-Chi, M., B'eryl Laplace-Builhe, Travnickova, J., Luz-crawford, P.,  
1140 Tejedor, G., Phan, Q. T., Duroux-richard, I., Levraud, J., Kissa, K., Lutfalla, G.,  
1141 Jorgensen, C., Djouad, F., Laplace-Builhe, B., Travnickova, J., Luz-crawford,  
1142 P., Tejedor, G., Phan, Q. T., Duroux-richard, I., Levraud, J., Kissa, K., Lutfalla,  
1143 G., Jorgensen, C. & Djouad, F. Identification of polarized macrophage subsets  
1144 in zebrafish. *Elife* **4**, 1–14 (2015).
- 1145 31. Matrone, G., Taylor, J., Wilson, K., ... J. B.-I. journal of & 2013, undefined.  
1146 Laser-targeted ablation of the zebrafish embryonic ventricle: a novel model of  
1147 cardiac injury and repair. *Elsevier*.
- 1148 32. Kaveh, A., Bruton, F. A., Buckley, C., Oremek, M. E. M., Tucker, C. S., Mullins,  
1149 J. J., Taylor, J. M., Rossi, A. G. & Denvir, M. A. Live Imaging of Heart Injury in  
1150 Larval Zebrafish Reveals a Multi-Stage Model of Neutrophil and Macrophage  
1151 Migration. *Front. Cell Dev. Biol.* **8**, 579943 (2020).
- 1152 33. Shiau, C. E., Kaufman, Z., Meireles, A. M. & Talbot, W. S. Differential  
1153 Requirement for *irf8* in Formation of Embryonic and Adult Macrophages in  
1154 Zebrafish. *PLoS One* **10**, 1–15 (2015).
- 1155 34. Bevan, L., Lim, Z. W., Venkatesh, B., Riley, P. R., Martin, P. & Richardson, R.  
1156 J. Specific macrophage populations promote both cardiac scar deposition and  
1157 subsequent resolution in adult zebrafish. *Cardiovasc. Res.* (2019)  
1158 doi:10.1093/cvr/cvz221.
- 1159 35. Pisharath, H., Rhee, J. M., Swanson, M. A., Leach, S. D. & Parsons, M. J.  
1160 Targeted ablation of beta cells in the embryonic zebrafish pancreas using *E.*  
1161 *coli* nitroreductase. *Mech. Dev.* **124**, 218–229 (2007).
- 1162 36. Yoshimura, C., Nagasaka, A., Kurose, H. & Nakaya, M. Efferocytosis during  
1163 myocardial infarction. *J. Biochem.* **168**, 1–6 (2020).
- 1164 37. Chablais, F., Veit, J., Rainer, G. & Jaźwińska, A. The zebrafish heart  
1165 regenerates after cryoinjury-induced myocardial infarction. *BMC Dev. Biol.* **11**,  
1166 21 (2011).
- 1167 38. Taylor, J. M., Nelson, C. J., Bruton, F. A., Baghadrani, A. K., Buckley, C.,  
1168 Tucker, C. S., Rossi, A. G., Mullins, J. J. & Denvir, M. A. Adaptive prospective  
1169 optical gating enables day-long 3D time-lapse imaging of the beating  
1170 embryonic zebrafish heart. *Nat. Commun.* **10**, 1–15 (2019).

- 1171 39. Bajpai, G., Schneider, C., Wong, N., Bredemeyer, A., Hulsmans, M.,  
1172 Nahrendorf, M., Epelman, S., Kreisel, D., Liu, Y., Itoh, A., Shankar, T. S.,  
1173 Selzman, C. H., Drakos, S. G. & Lavine, K. J. The human heart contains  
1174 distinct macrophage subsets with divergent origins and functions. *Nat. Med.*  
1175 **24**, 1234–1245 (2018).
- 1176 40. Lavine, K. J., Epelman, S., Uchida, K., Weber, K. J., Nichols, C. G., Schilling,  
1177 J. D., David, M., Randolph, G. J., Mann, D. L., Lavine, K. J., Epelman, S.,  
1178 Uchida, K., Weber, K. J., Nichols, C. G. & Schilling, J. D. Distinct macrophage  
1179 lineages contribute to disparate patterns of cardiac recovery and remodeling in  
1180 the neonatal and adult heart. **113**, (2016).
- 1181 41. Karra, R., Foglia, M. J., Choi, W.-Y., Belliveau, C., DeBenedittis, P. & Poss, K.  
1182 D. Vegfaa instructs cardiac muscle hyperplasia in adult zebrafish. *Proc. Natl.*  
1183 *Acad. Sci. U. S. A.* 201722594 (2018) doi:10.1073/pnas.1722594115.
- 1184 42. Zentilin, L., Puligadda, U., Lionetti, V., Zacchigna, S., Collesi, C., Pattarini, L.,  
1185 Ruozi, G., Camporesi, S., Sinagra, G., Pepe, M., Recchia, F. A. & Giacca, M.  
1186 Cardiomyocyte VEGFR-1 activation by VEGF-B induces compensatory  
1187 hypertrophy and preserves cardiac function after myocardial infarction. *FASEB*  
1188 *J. • Res. Commun. FASEB J* **24**, 1467–1478 (2010).
- 1189 43. Kivelä, R., Hemanthakumar, K. A., Vaparanta, K., Robciuc, M., Izumiya, Y.,  
1190 Kidoya, H., Takakura, N., Peng, X., Sawyer, D. B., Elenius, K., Walsh, K. &  
1191 Alitalo, K. Endothelial Cells Regulate Physiological Cardiomyocyte Growth via  
1192 VEGFR2-Mediated Paracrine Signaling. *Circulation* **139**, 2570–2584 (2019).
- 1193 44. Chimote, G., Sreenivasan, J., Pawar, N., Subramanian, J., Sivaramakrishnan,  
1194 H. & Sharma, S. Comparison of effects of anti-angiogenic agents in the  
1195 zebrafish efficacy-toxicity model for translational anti-angiogenic drug  
1196 discovery. *Drug Des. Devel. Ther.* **8**, 1107–1123 (2014).
- 1197 45. Kugler, E. C., Lessen, M., Daetwyler, S., Chhabria, K., Savage, A. M., Silva,  
1198 V., Plant, K., MacDonald, R. B., Huisken, J., Wilkinson, R. N., Schulte-Merker,  
1199 S., Armitage, P. & Chico, T. J. Cerebrovascular endothelial cells form transient  
1200 Notch-dependent cystic structures in zebrafish. *EMBO Rep.* **20**, (2019).
- 1201 46. Zhao, L., Borikova, A. L., Ben-Yair, R., Guner-Ataman, B., MacRae, C. A., Lee,  
1202 R. T., Geoffrey Burns, C. & Burns, C. E. Notch signaling regulates  
1203 cardiomyocyte proliferation during zebrafish heart regeneration. *Proc. Natl.*  
1204 *Acad. Sci. U. S. A.* **111**, 1403–1408 (2014).

- 1205 47. Raya, A., Koth, C. M., Büscher, D., Kawakami, Y., Itoh, T., Raya, R. M.,  
1206 Sternik, G., Tsai, H.-J., Rodríguez-Esteban, C. & Izpisúa-Belmonte, J. C.  
1207 Activation of Notch signaling pathway precedes heart regeneration in  
1208 zebrafish. *Proc. Natl. Acad. Sci. U. S. A.* **100 Suppl 1**, 11889–95 (2003).
- 1209 48. Zhao, L., Ben-Yair, R., Burns, C. G. E. G. & Burns, C. G. E. G. Endocardial  
1210 Notch Signaling Promotes Cardiomyocyte Proliferation in the Regenerating  
1211 Zebrafish Heart through Wnt Pathway Antagonism. *Cell Rep.* **26**, 546-554.e5  
1212 (2019).
- 1213 49. Samsa, L. A., Givens, C., Tzima, E., Stainier, D. Y. R., Qian, L. & Liu, J.  
1214 Cardiac contraction activates endocardial Notch signaling to modulate  
1215 chamber maturation in zebrafish. *Development* **142**, 4080–4091 (2015).
- 1216 50. Gemberling, M., Karra, R., Dickson, A. L. & Poss, K. D. Nrg1 is an injury-  
1217 induced cardiomyocyte mitogen for the endogenous heart regeneration  
1218 program in zebrafish. 1–17 (2015) doi:10.7554/eLife.05871.
- 1219 51. Bersell, K., Arab, S., Haring, B. & Kühn, B. Neuregulin1/ErbB4 Signaling  
1220 Induces Cardiomyocyte Proliferation and Repair of Heart Injury. *Cell* **138**, 257–  
1221 270 (2009).
- 1222 52. Honkoop, H., Bakker, D. E. de, Aharonov, A., Kruse, F., Shakked, A., Nguyen,  
1223 P. D., Heus, C. de, Garric, L., Muraro, M. J., Shoffner, A., Tessadori, F.,  
1224 Peterson, J. C., Noort, W., Bertozzi, A., Weidinger, G., Posthuma, G., Grün,  
1225 D., Laarse, W. J. van der, Klumperman, J., Jaspers, R. T., Poss, K. D.,  
1226 Oudenaarden, A. van, Tzahor, E., Bakkers, J., de Bakker, D. E., Aharonov, A.,  
1227 Kruse, F., Shakked, A., Nguyen, P. D., de Heus, C., Garric, L., Muraro, M. J.,  
1228 Shoffner, A., Tessadori, F., Peterson, J. C., Noort, W., Bertozzi, A., Weidinger,  
1229 G., Posthuma, G., Grün, D., van der Laarse, W. J., Klumperman, J., Jaspers,  
1230 R. T., Poss, K. D., van Oudenaarden, A., Tzahor, E. & Bakkers, J. Single-cell  
1231 analysis uncovers that metabolic reprogramming by ErbB2 signaling is  
1232 essential for cardiomyocyte proliferation in the regenerating heart. *Elife* **8**,  
1233 (2019).
- 1234 53. Rasouli, S. J. & Stainier, D. Y. R. Regulation of cardiomyocyte behavior in  
1235 zebrafish trabeculation by Neuregulin 2a signaling. *Nat. Commun.* **8**, 15281  
1236 (2017).
- 1237 54. Uribe, V., Ramadass, R., Dogra, D., Rasouli, S. J., Gunawan, F., Nakajima, H.,  
1238 Chiba, A., Reischauer, S., Mochizuki, N. & Stainier, D. Y. R. In vivo analysis of

- 1239 cardiomyocyte proliferation during trabeculation. (2018)  
1240 doi:10.1242/dev.164194.
- 1241 55. Dovey, H. F., John, V., Anderson, J. P., Chen, L. Z., De Saint Andrieu, P.,  
1242 Fang, L. Y., Freedman, S. B., Folmer, B., Goldbach, E., Holsztyńska, E. J., Hu,  
1243 K. L., Johnson-Wood, K. L., Kennedy, S. L., Kholodenko, D., Knops, J. E.,  
1244 Latimer, L. H., Lee, M., Liao, Z., Lieberburg, I. M., Motter, R. N., Mutter, L. C.,  
1245 Nietz, J., Quinn, K. P., Sacchi, K. L., Seubert, P. A., Shopp, G. M., Thorsett, E.  
1246 D., Tung, J. S., Wu, J., Yang, S., Yin, C. T., Schenk, D. B., May, P. C., Altstiel,  
1247 L. D., Bender, M. H., Boggs, L. N., Britton, T. C., Clemens, J. C., Czilli, D. L.,  
1248 Dieckman-McGinty, D. K., Droste, J. J., Fuson, K. S., Gitter, B. D., Hyslop, P.  
1249 A., Johnstone, E. M., Li, W. Y., Little, S. P., Mabry, T. E., Miller, F. D., Ni, B.,  
1250 Nissen, J. S., Porter, W. J., Potts, B. D., Reel, J. K., Stephenson, D., Su, Y.,  
1251 Shipley, L. A., Whitesitt, C. A., Yin, T. & Audia, J. E. Functional gamma-  
1252 secretase inhibitors reduce beta-amyloid peptide levels in brain. *J.*  
1253 *Neurochem.* **76**, 173–181 (2001).
- 1254 56. Micchelli, C. A., Esler, W. P., Kimberly, W. T., Jack, C., Berezovska, O.,  
1255 Kornilova, A., Hyman, B. T., Perrimon, N. & Wolfe, M. S. Gamma-  
1256 secretase/presenilin inhibitors for Alzheimer’s disease phenocopy Notch  
1257 mutations in *Drosophila*. *FASEB J.* **17**, 79–81 (2003).
- 1258 57. Geling, A., Steiner, H., Willem, M., Bally-Cuif, L. & Haass, C. A  $\gamma$ -secretase  
1259 inhibitor blocks Notch signaling in vivo and causes a severe neurogenic  
1260 phenotype in zebrafish. *EMBO Rep.* **3**, 688–694 (2002).
- 1261 58. Gemberling, M., Karra, R., Dickson, A. L. & Poss, K. D. Nrg1 is an injury-  
1262 induced cardiomyocyte mitogen for the endogenous heart regeneration  
1263 program in zebrafish. *Elife* **4**, (2015).
- 1264 59. Han, Y., Chen, A., Umansky, K.-B., Oonk, K. A., Choi, W.-Y., Dickson, A. L.,  
1265 Ou, J., Cigliola, V., Yifa, O., Cao, J., Tornini, V. A., Cox, B. D., Tzahor, E. &  
1266 Poss, K. D. Vitamin D Stimulates Cardiomyocyte Proliferation and Controls  
1267 Organ Size and Regeneration in Zebrafish. *Dev. Cell* **0**, (2019).
- 1268 60. Vedula, V., Lee, J., Xu, H., Kuo, C. J., Hsiai, T. K. & Marsden, A. L. A method  
1269 to quantify mechanobiologic forces during zebrafish cardiac development  
1270 using 4-D light sheet imaging and computational modeling. 1–24 (2017).
- 1271 61. Zuppo, D. A. & Tsang, M. Zebrafish heart regeneration: Factors that stimulate  
1272 cardiomyocyte proliferation. *Semin. Cell Dev. Biol.* (2019)

- 1273 doi:10.1016/J.SEMCDB.2019.09.005.
- 1274 62. Lyons, D. A., Pogoda, H. M., Voas, M. G., Woods, I. G., Diamond, B., Nix, R.,  
1275 Arana, N., Jacobs, J. & Talbot, W. S. *erbb3* and *erbb2* are essential for  
1276 Schwann cell migration and myelination in zebrafish. *Curr. Biol.* **15**, 513–524  
1277 (2005).
- 1278 63. Priya, R., Allanki, S., Gentile, A., Mansingh, S., Uribe, V., Maischein, H. M. &  
1279 Stainier, D. Y. R. Tension heterogeneity directs form and fate to pattern the  
1280 myocardial wall. *Nature* **588**, 130–134 (2020).
- 1281 64. Gálvez-Santisteban, M., Chen, D., Zhang, R., Serrano, R., Nguyen, C., Zhao,  
1282 L., Nerb, L., Masutani, E. M., Vermot, J., Burns, C. G., Burns, C. E., del Álamo,  
1283 J. C. & Chi, N. C. Hemodynamic-mediated endocardial signaling controls in  
1284 vivo myocardial reprogramming. *Elife* **8**, (2019).
- 1285 65. Nguyen-Chi, M., Laplace-builhé, B., Travnickova, J., Luz-crawford, P., Tejedor,  
1286 G., Lutfalla, G., Kissa, K., Jorgensen, C. & Djouad, F. TNF signaling and  
1287 macrophages govern fin regeneration in zebrafish larvae. *Nat. Publ. Gr.* **8**,  
1288 e2979–e2979 (2017).
- 1289 66. Kuil, L. E., Oosterhof, N., Ferrero, G., Mikulášová, T., Hason, M., Dekker, J.,  
1290 Rovira, M., van der Linde, H. C., van Strien, P. M. H., de Pater, E., Schaaf, G.,  
1291 Bindels, E. M. J., Wittamer, V. & van Ham, T. J. Zebrafish macrophage  
1292 developmental arrest underlies depletion of microglia and reveals Csf1r-  
1293 independent metaphocytes. *Elife* **9**, (2020).
- 1294 67. Lin, X., Zhou, Q., Zhao, C., Lin, G., Xu, J. & Wen, Z. An Ectoderm-Derived  
1295 Myeloid-like Cell Population Functions as Antigen Transporters for Langerhans  
1296 Cells in Zebrafish Epidermis. *Dev. Cell* **49**, 605-617.e5 (2019).
- 1297 68. Ginhoux, F., Schultze, J. L., Murray, P. J., Ochando, J. & Biswas, S. K.  
1298 perspective New insights into the multidimensional concept of macrophage  
1299 ontogeny , activation and function. **17**, (2016).
- 1300 69. Koth, J., Wang, X., Killen, A. C., Stockdale, W. T., Potts, H. G., Jefferson, A.,  
1301 Bonkhofer, F., Riley, P. R., Patient, R. K., Göttgens, B. & Mommersteeg, M. T.  
1302 M. Runx1 promotes scar deposition and inhibits myocardial proliferation and  
1303 survival during zebrafish heart regeneration. *Development* **147**, (2020).
- 1304 70. Herrgen, L., Voss, O. P. & Akerman, C. J. Calcium-Dependent Neuroepithelial  
1305 Contractions Expel Damaged Cells from the Developing Brain. *Dev. Cell* **31**,  
1306 599–613 (2014).

- 1307 71. Hill, R. A., Damisah, E. C., Chen, F., Kwan, A. C. & Grutzendler, J. Targeted  
1308 two-photon chemical apoptotic ablation of defined cell types in vivo. *Nat.*  
1309 *Commun.* **8**, 1–15 (2017).
- 1310 72. van Amerongen, M. J., Harmsen, M. C., van Rooijen, N., Petersen, A. H. & van  
1311 Luyn, M. J. A. Macrophage depletion impairs wound healing and increases left  
1312 ventricular remodeling after myocardial injury in mice. *Am. J. Pathol.* **170**, 818–  
1313 29 (2007).
- 1314 73. Frantz, S., Hofmann, U., Fraccarollo, D., Schafer, A., Kranepuhl, S., Hagedorn,  
1315 I., Nieswandt, B., Nahrendorf, M., Wagner, H., Bayer, B., Pachel, C., Schon,  
1316 M. P., Kneitz, S., Bobinger, T., Weidemann, F., Ertl, G., Bauersachs, J.,  
1317 Schäfer, A., Kranepuhl, S., Hagedorn, I., Nieswandt, B., Nahrendorf, M.,  
1318 Wagner, H., Bayer, B., Pachel, C., Schön, M. P., Kneitz, S., Bobinger, T.,  
1319 Weidemann, F., Ertl, G., Bauersachs, J., Schafer, A., Kranepuhl, S.,  
1320 Hagedorn, I., Nieswandt, B., Nahrendorf, M., Wagner, H., Bayer, B., Pachel,  
1321 C., Schon, M. P., Kneitz, S., Bobinger, T., Weidemann, F., Ertl, G. &  
1322 Bauersachs, J. Monocytes/macrophages prevent healing defects and left  
1323 ventricular thrombus formation after myocardial infarction. *FASEB J.* **27**, 871–  
1324 881 (2013).
- 1325 74. Leor, J., Palevski, D., Amit, U. & Konfino, T. Seminars in Cell & Developmental  
1326 Biology Macrophages and regeneration : Lessons from the heart. *Semin. Cell*  
1327 *Dev. Biol.* **58**, 26–33 (2016).
- 1328 75. Beisaw, A., Kuenne, C., Günther, S., Dallmann, J., Wu, C.-C., Bentsen, M.,  
1329 Looso, M. & Stainier, D. AP-1 Contributes to Chromatin Accessibility to  
1330 Promote Sarcomere Disassembly and Cardiomyocyte Protrusion during  
1331 Zebrafish Heart Regeneration. *Circ. Res.* CIRCRESAHA.119.316167 (2020)  
1332 doi:10.1161/CIRCRESAHA.119.316167.
- 1333 76. Morikawa, Y., Zhang, M., Heallen, T., Leach, J., Tao, G., Xiao, Y., Bai, Y., Li,  
1334 W., Willerson, J. T. & Martin, J. F. Actin cytoskeletal remodeling with protrusion  
1335 formation is essential for heart regeneration in Hippo-deficient mice. *Sci.*  
1336 *Signal.* **8**, (2015).
- 1337 77. Itou, J., Oishi, I., Kawakami, H., Glass, T. J., Richter, J., Johnson, A., Lund, T.  
1338 C. & Kawakami, Y. Migration of cardiomyocytes is essential for heart  
1339 regeneration in zebrafish. *Dev.* **139**, 4133–4142 (2012).
- 1340 78. de Preux Charles, A.-S., Bise, T., Baier, F., Marro, J. & Jaźwińska, A. Distinct



- 1341 effects of inflammation on preconditioning and regeneration of the adult  
1342 zebrafish heart. *Open Biol.* **6**, 160102 (2016).
- 1343 79. Godwin, J. W., Debuque, R., Salimova, E. & Rosenthal, N. A. Heart  
1344 regeneration in the salamander relies on macrophage- mediated control of fi  
1345 broblast activation and the extracellular landscape. *npj Regen. Med.* 1–11  
1346 (2017) doi:10.1038/s41536-017-0027-y.
- 1347 80. Marín-juez, R., Marass, M., Gauvrit, S., Rossi, A., Lai, S. & Materna, S. C. Fast  
1348 revascularization of the injured area is essential to support zebrafish heart  
1349 regeneration. **113**, (2016).
- 1350 81. Weinberger, M., Simões, F. C., Patient, R., Sauka-Spengler, T. & Riley, P. R.  
1351 Functional Heterogeneity within the Developing Zebrafish Epicardium. *Dev.*  
1352 *Cell* **0**, (2020).
- 1353 82. Stevens, S. M., von Gise, A., VanDusen, N., Zhou, B. & Pu, W. T. Epicardium  
1354 is required for cardiac seeding by yolk sac macrophages, precursors of  
1355 resident macrophages of the adult heart. *Dev. Biol.* **413**, 153–159 (2016).
- 1356 83. Deniset, J. F., Belke, D., Lee, W.-Y., Weber, G. F., Fedak, P. W. M. & Kubes,  
1357 P. Gata6+ Pericardial Cavity Macrophages Relocate to the Injured Heart and  
1358 Prevent Cardiac Fibrosis. *Immunity* **51**, 131-140.e5 (2019).
- 1359 84. Kimmel, C. B., Ballard, W. W., Kimmel, S. R., Ullmann, B. & Schilling, T. F.  
1360 Stages of Embryonic Development of the Zebrafish. **10**, (1995).
- 1361 85. Huang, C. J., Tu, C. T., Hsiao, C. Der, Hsieh, F. J. & Tsai, H. J. Germ-line  
1362 transmission of a myocardium-specific GFP transgene reveals critical  
1363 regulatory elements in the cardiac myosin light chain 2 promoter of zebrafish.  
1364 *Dev. Dyn.* **228**, 30–40 (2003).
- 1365 86. Yoo, S. K., Deng, Q., Cavnar, P. J., Wu, Y. I., Hahn, K. M. & Huttenlocher, A.  
1366 Differential Regulation of Protrusion and Polarity by PI(3)K during Neutrophil  
1367 Motility in Live Zebrafish. *Dev. Cell* **18**, 226–236 (2010).
- 1368 87. Ellett, F., Pase, L., Hayman, J. W., Andrianopoulos, A. & Lieschke, G. J.  
1369 mpeg1 promoter transgenes direct macrophage-lineage expression in  
1370 zebrafish. *Blood* **117**, e49 (2011).
- 1371 88. Renshaw, S. A., Loynes, C. A., Trushell, D. M. I., Elworthy, S., Ingham, P. W.  
1372 & Whyte, M. K. B. A transgenic zebrafish model of neutrophilic inflammation.  
1373 *Blood* **108**, 3976–3978 (2006).
- 1374 89. Mickoleit, M., Schmid, B., Weber, M., Fahrbach, F. O., Hombach, S.,

- 1375 Reischauer, S. & Huisken, J. High-resolution reconstruction of the beating  
1376 zebrafish heart. *Nat. Methods* **11**, 919–922 (2014).
- 1377 90. Lin, Y.-F., Swinburne, I. & Yelon, D. Multiple influences of blood flow on  
1378 cardiomyocyte hypertrophy in the embryonic zebrafish heart. *Dev. Biol.* **362**,  
1379 242–253 (2012).
- 1380 91. Gray, C., Loynes, C. A., Whyte, M. K. B., Crossman, D. C., Renshaw, S. A. &  
1381 Chico, T. J. A. Simultaneous intravital imaging of macrophage and neutrophil  
1382 behaviour during inflammation using a novel transgenic zebrafish. 811–819  
1383 (2011) doi:10.1160/TH10-08-0525.
- 1384 92. Davison, J. M., Akitake, C. M., Goll, M. G., Rhee, J. M., Gosse, N., Baier, H.,  
1385 Halpern, M. E., Leach, S. D. & Parsons, M. J. Transactivation from Gal4-VP16  
1386 transgenic insertions for tissue-specific cell labeling and ablation in zebrafish.  
1387 *Dev. Biol.* **304**, 811–824 (2007).
- 1388 93. Rottbauer, W., Saurin, A. J., Lickert, H., Shen, X., Burns, C. G., Wo, Z. G.,  
1389 Kemler, R., Kingston, R., Wu, C. & Fishman, M. Reptin and pontin  
1390 antagonistically regulate heart growth in zebrafish embryos. *Cell* **111**, 661–672  
1391 (2002).
- 1392 94. Ninov, N., Borius, M. & Stainier, D. Y. R. Different levels of Notch signaling  
1393 regulate quiescence, renewal and differentiation in pancreatic endocrine  
1394 progenitors. *Development* **139**, 1557–1567 (2012).
- 1395 95. Chi, N. C., Shaw, R. M., De Val, S., Kang, G., Jan, L. Y., Black, B. L. &  
1396 Stainier, D. Y. R. Foxn4 directly regulates *tbx2b* expression and  
1397 atrioventricular canal formation. *Genes Dev.* **22**, 734–739 (2008).
- 1398 96. Choi, J., Dong, L., Ahn, J., Dao, D., Hammerschmidt, M. & Chen, J. N. FoxH1  
1399 negatively modulates *flk1* gene expression and vascular formation in zebrafish.  
1400 *Dev. Biol.* **304**, 735–744 (2007).
- 1401 97. Kikuchi, K., Gupta, V., Wang, J., Holdway, J. E., Wills, A. A., Fang, Y. & Poss,  
1402 K. D. *tcf21*<sup>+</sup> epicardial cells adopt non-myocardial fates during zebrafish heart  
1403 development and regeneration. *Development* **138**, 2895–902 (2011).
- 1404 98. Mickoleit, M., Schmid, B., Weber, M., Fahrbach, F. O., Hombach, S.,  
1405 Reischauer, S. & Huisken, J. High-resolution reconstruction of the beating  
1406 zebrafish heart. *Nat. Methods* **11**, 919–922 (2014).
- 1407 99. Almeida, R. G., Pan, S., Cole, K. L. H., Williamson, J. M., Early, J. J., Czopka,  
1408 T., Klingseisen, A., Chan, J. R. & Lyons, D. A. Myelination of Neuronal Cell

- 1409 Bodies when Myelin Supply Exceeds Axonal Demand. *Curr. Biol.* **28**, 1296-  
1410 1305.e5 (2018).
- 1411 100. Karlsson, J., Von Hofsten, J. & Olsson, P. E. Generating transparent zebrafish:  
1412 A refined method to improve detection of gene expression during embryonic  
1413 development. *Mar. Biotechnol.* **3**, 522–527 (2001).
- 1414 101. Miskolci, V., Squirrell, J., Rindy, J., Vincent, W., Sauer, J. D., Gibson, A.,  
1415 Eliceiri, K. W. & Huttenlocher, A. Distinct inflammatory and wound healing  
1416 responses to complex caudal fin injuries of larval zebrafish. *Elife* **8**, (2019).
- 1417 102. Hoodless, L. J., Lucas, C. D., Duffin, R., Denvir, M. A., Haslett, C., Tucker, C.  
1418 S. & Rossi, A. G. Genetic and pharmacological inhibition of CDK9 drives  
1419 neutrophil apoptosis to resolve inflammation in zebrafish in vivo. *Sci. Rep.* **6**,  
1420 36980 (2016).
- 1421 103. Burns, C. G. & MacRae, C. A. Purification of hearts from zebrafish embryos.  
1422 *BioTechniques* vol. 40 274–282 (2006).

1423

1424 **Figures:**

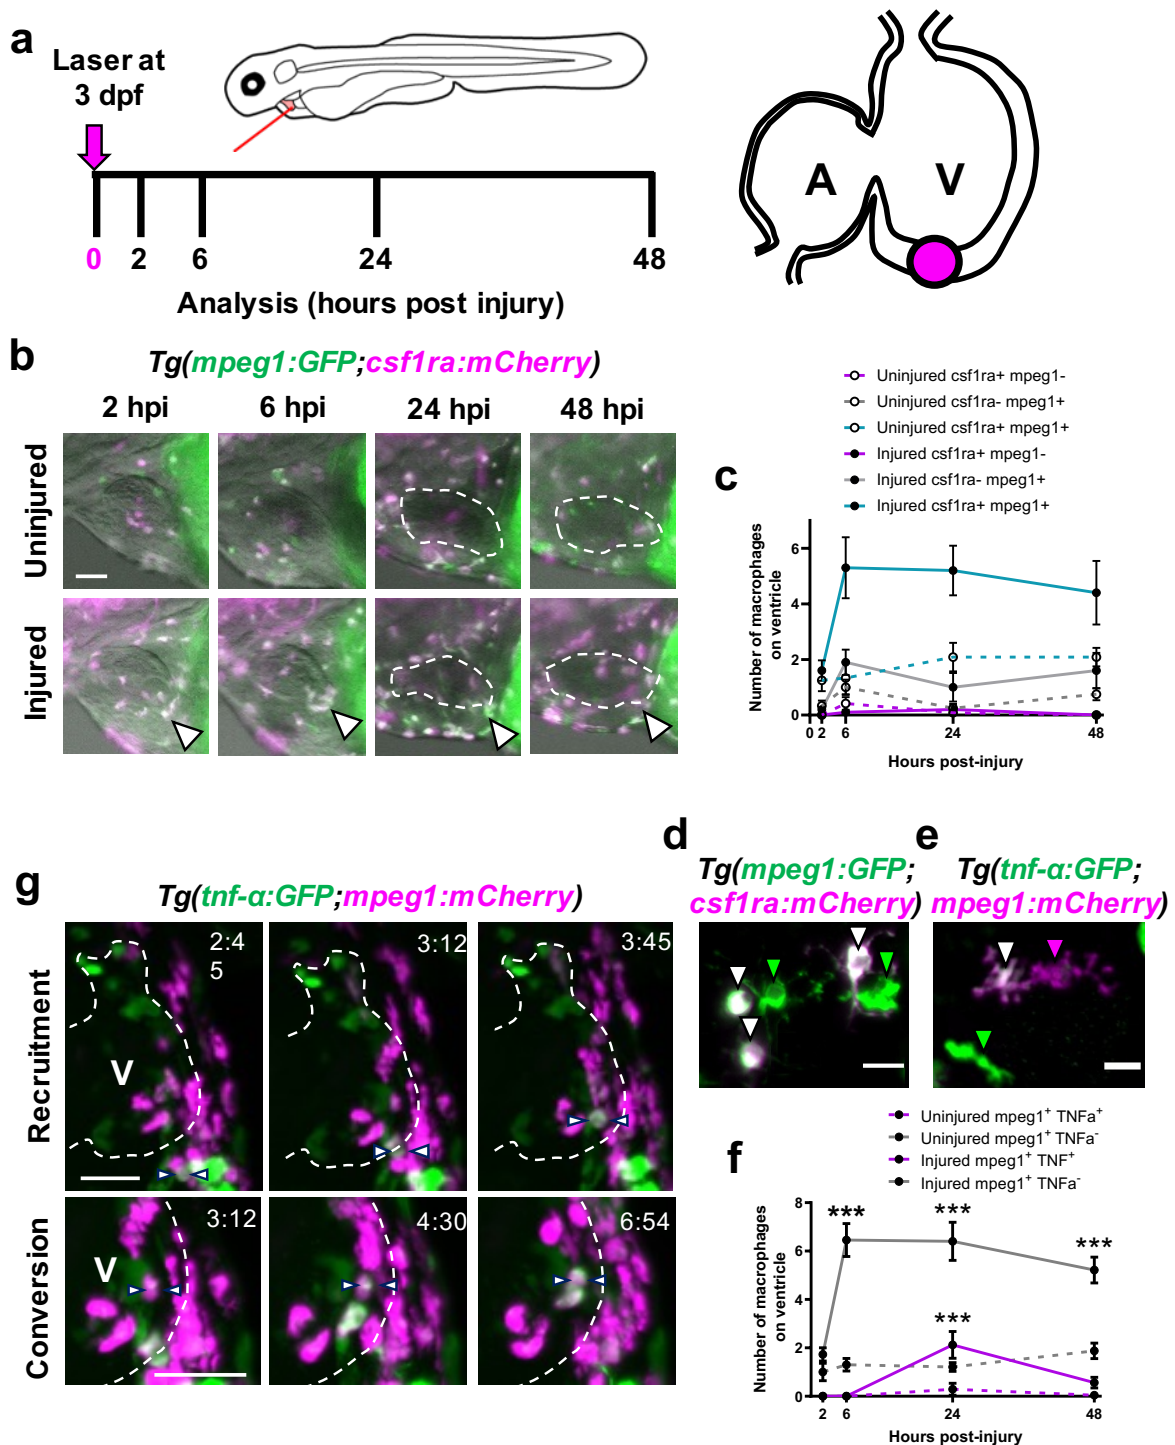

1425

1426 **Figure 1: Cardiac macrophages display heterogeneity and plasticity following**  
 1427 **injury.**

1428 (a) Schematic illustrating the cardiac laser injury model with imaging timepoints  
 1429 marked (left) and the injury site at ventricular apex of a 3 dpf larval heart marked  
 1430 (magenta circle) (right). (b) Representative lateral view epifluorescence images of  
 1431 uninjured and injured hearts at the standard timepoints in  
 1432 *Tg(mpeg1:GFP;csf1ra:gal4;UAS:NfsB-mCherry)* (abbreviated to *csf1ra:mCherry* in

1433 all panels), white arrow = ventricular apex, dashed line = heart outline. (c)  
1434 Quantification of number of *csf1ra+mpeg1-*, *csf1ra-mpeg1+* and *csf1ra+mpeg1+*  
1435 macrophages on the ventricle in uninjured and injured larvae at standard timepoints  
1436 (n=10-12). (d) Representative epifluorescence image of *csf1ra-mpeg1+* and  
1437 *csf1ra+mpeg1+* macrophages of different morphologies. (e) Representative  
1438 epifluorescence image of *tnf- $\alpha$ +mpeg1+* and *tnf- $\alpha$ -mpeg1+* macrophages. (f)  
1439 Quantification of number of *tnf- $\alpha$ +mpeg1+* and *tnf- $\alpha$ -mpeg1+* macrophages on the  
1440 ventricle in uninjured and injured larvae at standard timepoints (n=10-25). (g) Time-  
1441 lapse stills of injured *Tg(tnf- $\alpha$ :GFP;mpeg1:mCherry)* ventricles imaged live in the  
1442 larvae by heart-synchronised light-sheet microscopy. Timestamps indicated, dashed  
1443 line = ventricle outline, arrows = macrophage recruited as *tnf- $\alpha$ +* (top) and  
1444 macrophage converting to *tnf- $\alpha$ +* (bottom). Scale bar = 50 $\mu$ m (b & g), 10 $\mu$ m (d & e).  
1445 \*\*\* $p \leq 0.001$ , 2way ANOVA followed by Holm-Sidak's Post-hoc test.  
1446

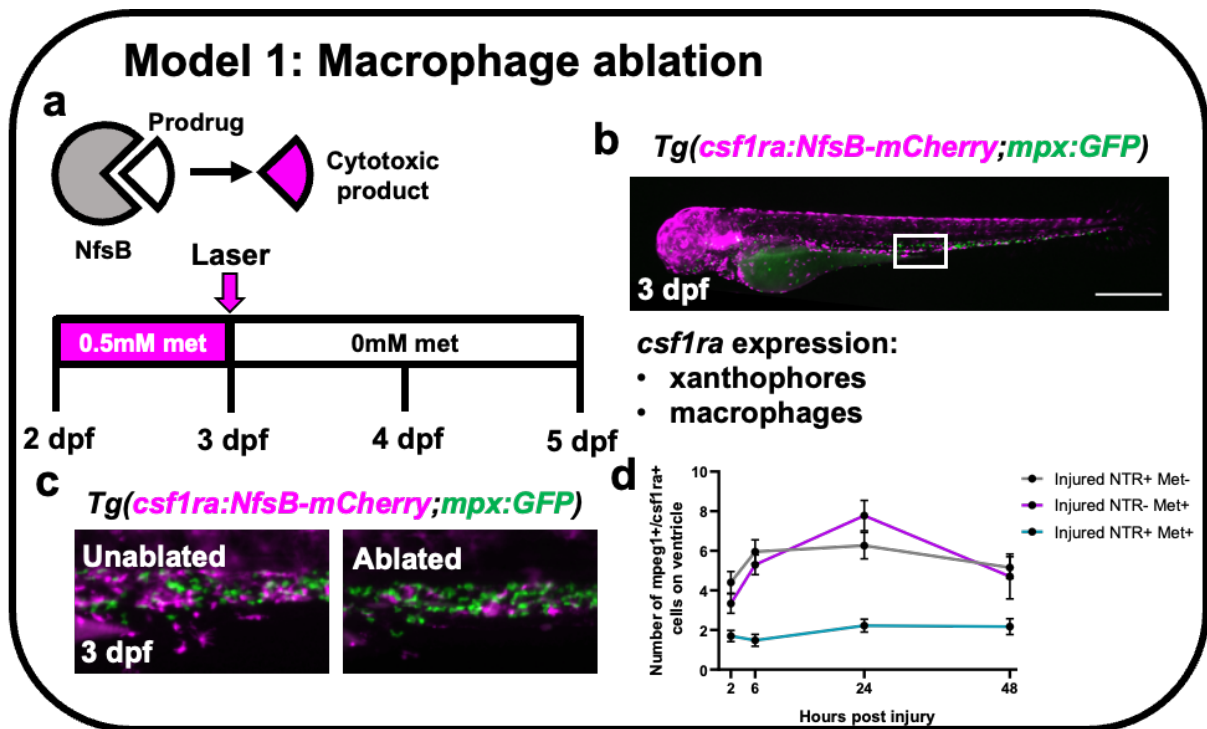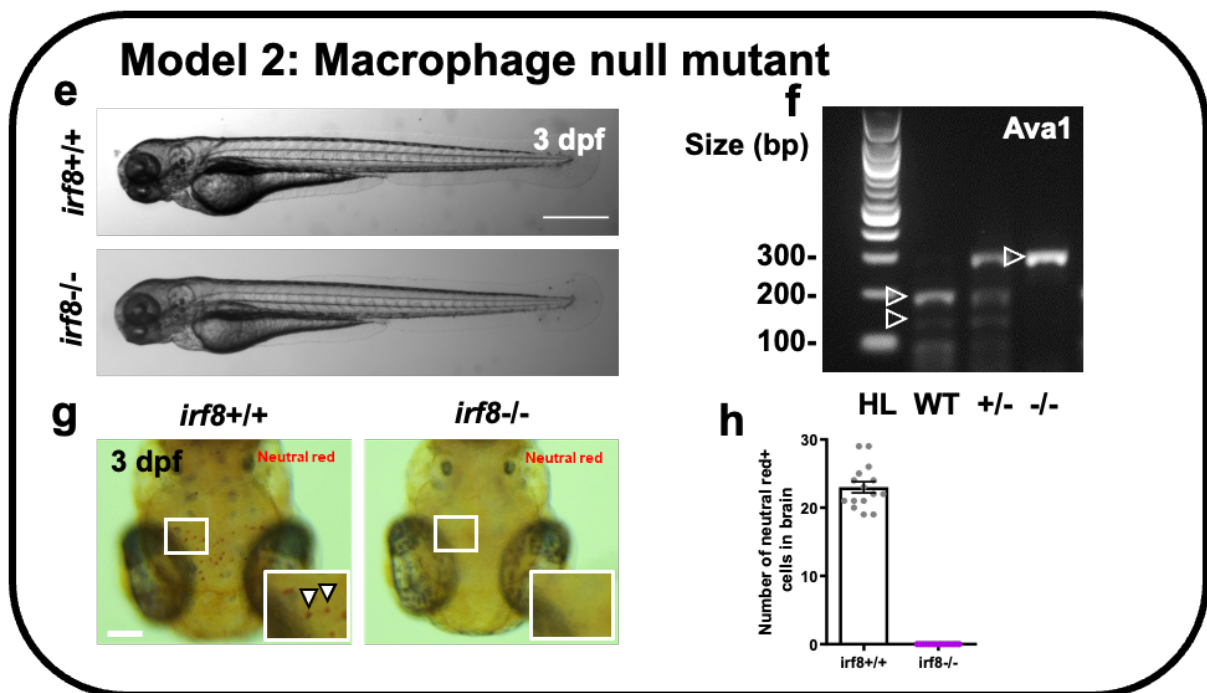

1447

1448

1449 **Figure 2: Macrophages can be pharmacologically ablated or developmentally**  
 1450 **blocked genetically.**

1451 (a) Schematic illustrating how nitroreductase enzyme 'NfsB' catabolises prodrug  
 1452 'metronidazole' to form a cytotoxic biproduct. (b) Representative epifluorescence  
 1453 image of a *Tg(csf1ra:gal4;UAS:NfsB-mCherry;mpx:GFP)* 3 dpf larva (abbreviated to  
 1454 *Tg(csf1ra:mCherry;mpx:GFP)* in all panels), white box = caudal haematopoietic

1455 tissue, magenta = macrophages and green = neutrophils (CHT) (c) Representative  
1456 images of ablated and unablated macrophages in the CHT, size and location  
1457 indicated in (b)) in *Tg(csfr1a:mCherry;mpx:GFP)* 3dpf larvae. (d) Quantification of  
1458 macrophages at standard timepoints, marked by either *mpeg1* or *csfr1a* on the  
1459 injured ventricle in each of the NTR=metronidazole ablation model's treatment  
1460 groups NTR+Met-, NTR-Met+ and NTR+Met+.(e) Representative brightfield images  
1461 of *irf8*<sup>+/+</sup> and *irf8*<sup>-/-</sup> larvae at 3 dpf. (f) Representative 1% agarose gel displaying  
1462 Ava1 restriction digest band pattern for WT, *irf8* heterozygous and homozygous  
1463 mutants. (g) Representative dorsal view brightfield image of 3 dpf larval heads  
1464 stained with neutral red vital dye with white zoom panel highlighting stained  
1465 macrophages (microglia) (red) in *irf8*<sup>+/+</sup> but not *irf8*<sup>-/-</sup> larvae. (h) Quantification of the  
1466 number of neutral red positive stained cells (macrophages/microglia) in larval brains  
1467 of *irf8*<sup>+/+</sup> and *irf8*<sup>-/-</sup> at 3 dpf. Scale bar = 500 $\mu$ m (b & e), 100 $\mu$ m (g).  
1468

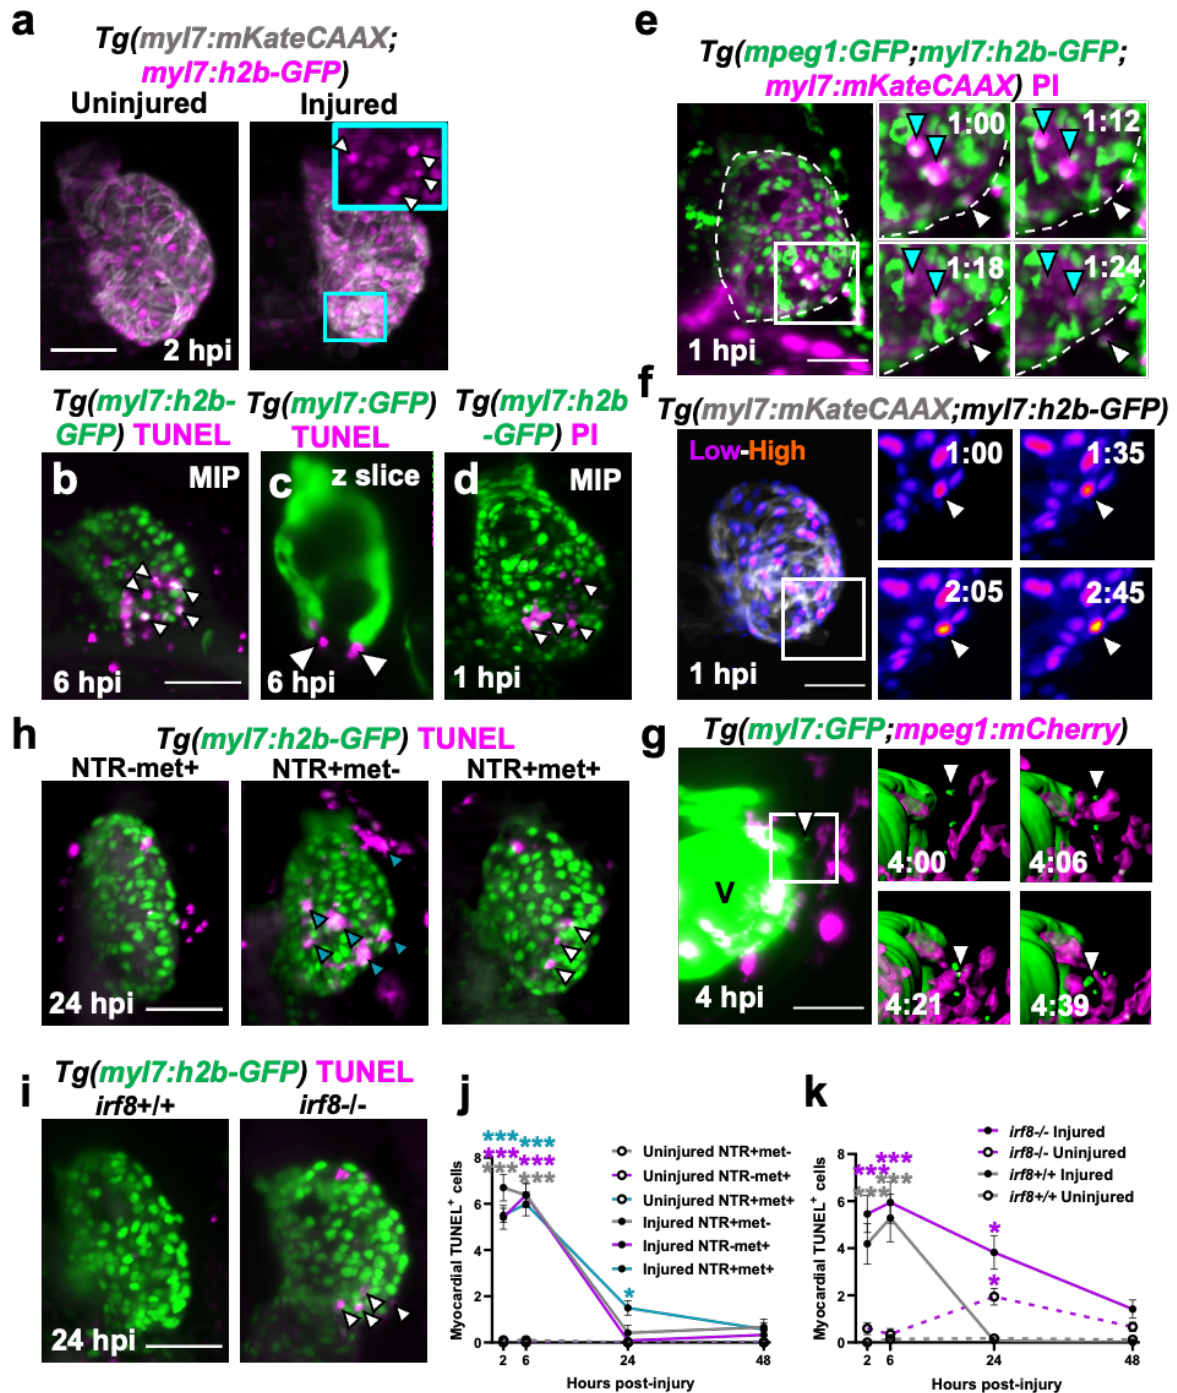

1469

1470 **Figure 3: Macrophages are required for timely removal of apoptotic**  
1471 **cardiomyocytes.**

1472 (a) Representative light-sheet-acquired images of uninjured and injured  
1473 *Tg(myI7:h2b-GFP; myI7:mKateCAAX)* ventricles highlighting condensed nuclei in  
1474 cyan outline zoom panel (white arrow-heads). (b) Representative light-sheet-  
1475 acquired images of TUNEL stained hearts 6 hpi at in (b) *Tg(myI7:h2b-GFP)* and (c)  
1476 *Tg(myI7:GFP)* larvae. White arrow-heads = apoptotic cardiomyocytes/myocardium.



1477 (d) Representative light-sheet-acquired image of a propidium iodide (PI) stained  
1478 *Tg(myI7:h2b-GFP)* heart 1 hpi. White arrow-heads = necrotic debris. (e) Time-lapse  
1479 stills of injured *Tg(myI7:h2b-GFP;myI7:mKateCAAX;mpeg1:GFP)* ventricles imaged  
1480 from 1 hpi by heart-synchronised light-sheet imaging. Round GFP<sup>low</sup> =  
1481 cardiomyocyte nuclei and stellate GFP<sup>high</sup> = macrophages. Cyan arrow-heads =  
1482 Necrotic cardiomyocyte nuclei and white arrow-heads = expelled necrotic  
1483 cardiomyocyte, white box = zoom panel. (f) Time-lapse stills of injured *Tg(myI7:h2b-*  
1484 *GFP;myI7:mKateCAAX)* ventricles imaged from 1 hpi. GFP intensity show by heat  
1485 LUT, white arrow-head = apoptotic cardiomyocyte/condensing nucleus, white box =  
1486 zoom panel. (g) Time-lapse stills of an injured *Tg(myI7:GFP;mpeg1:mCherry)*  
1487 ventricle from 4 hpi where the full size panel has high gain in the GFP channel to  
1488 highlight GFP<sup>low</sup> myocardial debris and zoom panels (area indicated by white box)  
1489 are surface rendered to highlight removal of myocardium (green) by macrophages  
1490 (magenta). V = high gain ventricle, white arrow-head = myocardial debris. (h)  
1491 Representative light-sheet acquired images of injured *Tg(myI7:h2b-*  
1492 *GFP;csfr1a:gal4;UAS:NfsB-mCherry)* ventricles per macrophage ablation model  
1493 injury group at 24 hpi. Cyan arrow-heads = Macrophages and white arrow-heads =  
1494 TUNEL+ cells. (i) Representative light-sheet acquired images of *irf8+/+* and *irf8/-*  
1495 *Tg(myI7:h2b-GFP)* hearts stained by TUNEL at 24 hpi. White arrow-heads =  
1496 TUNEL+ cells. (j) Quantification of TUNEL+ myocardial cells in uninjured and injured  
1497 *Tg(myI7:h2b-GFP;csfr1a:gal4;UAS:NfsB-mCherry)* ventricles per macrophage  
1498 ablation group. n=1-12 (k) Quantification of TUNEL+ myocardial cells in uninjured  
1499 and injured, *irf8+/+* and *irf8/-* *Tg(myI7:h2b-GFP)* ventricles. n=15-29. Scale bars =  
1500 50  $\mu$ m, \* $p \leq 0.05$ , \*\* $p \leq 0.01$ , \*\*\* $p \leq 0.001$  2way ANOVA followed by Holm-Sidak's Post-  
1501 hoc tests.  
1502

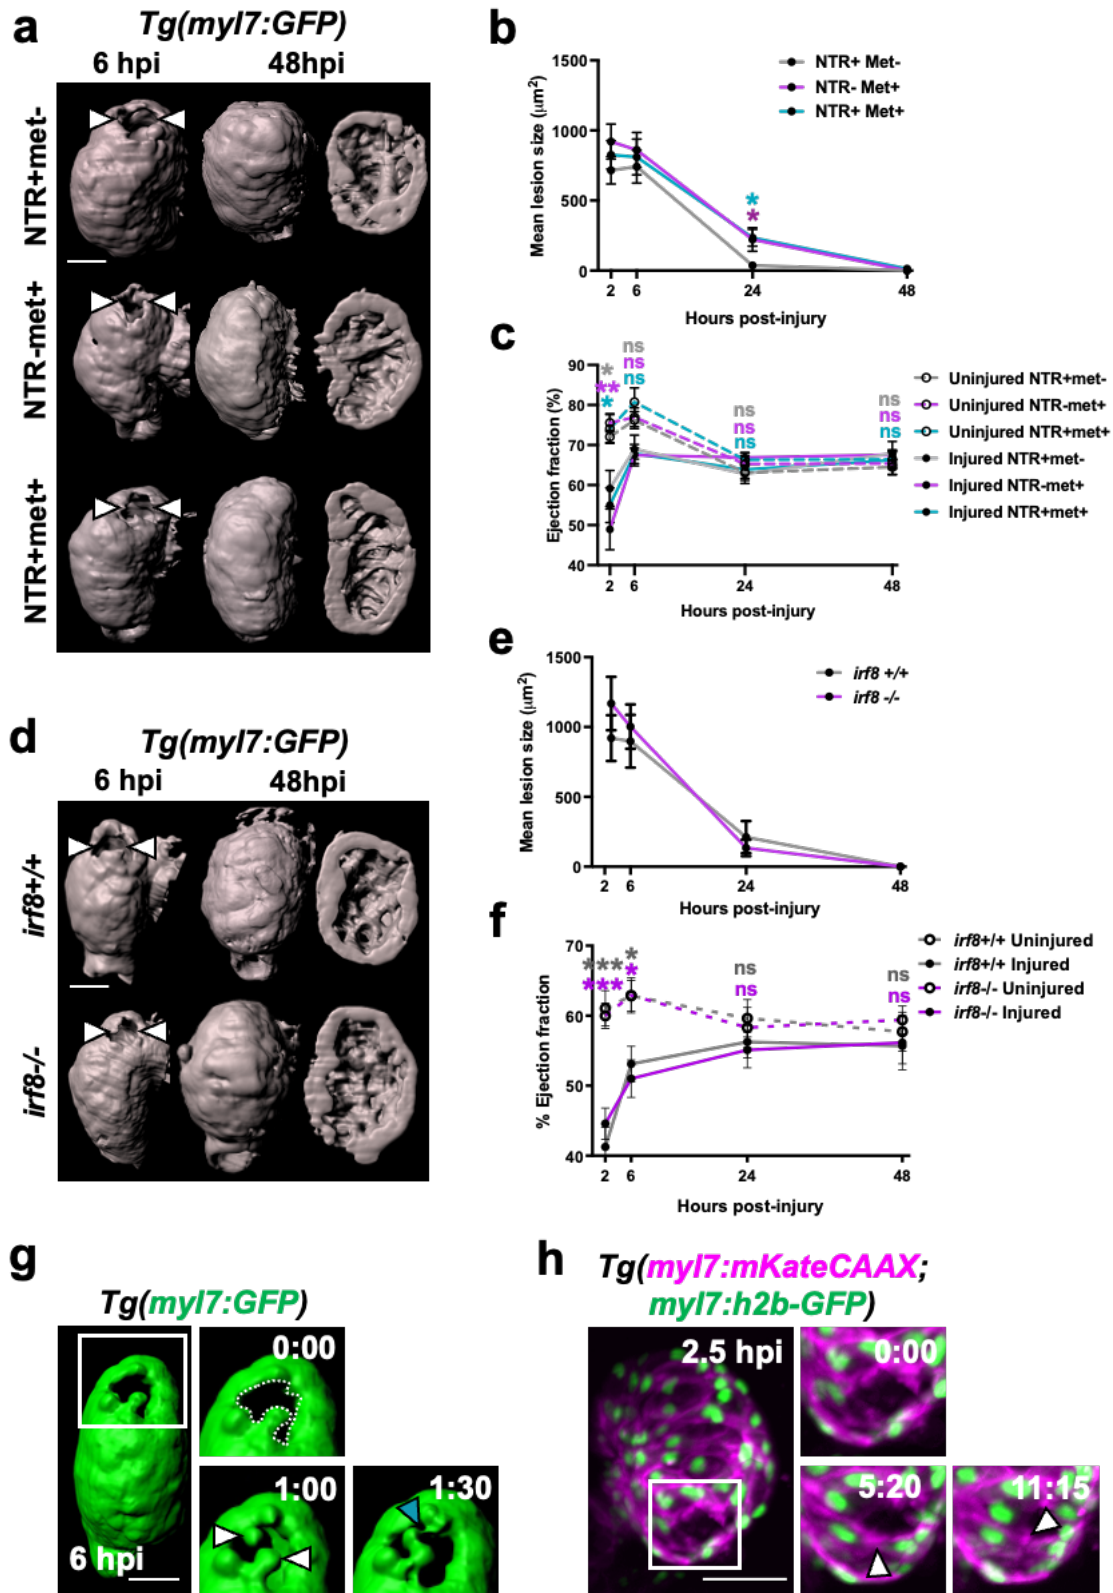

1503  
1504  
1505  
1506

**Figure 4: Macrophages not required for the recovery of cardiac structure or function.**

1507 (a) Representative GFP surface-renders of light-sheet-acquired z-stacks of injured  
1508 ventricles from *Tg(myI7:GFP;csfr1a:gal4;UAS:NfsB-mCherry)* larvae, macrophage  
1509 ablation groups as indicated in the figure. Abluminal myocardial surface is shown at  
1510 6 hpi (left) and abluminal and luminal surfaces shown at 48 hpi following  
1511 regeneration (middle & right). White arrow-heads = laser lesion. (b) Quantification of  
1512 mean lesion size in injured *Tg(myI7:GFP;csfr1a:gal4;UAS:NfsB-mCherry)* larvae per  
1513 macrophage ablation group. n=11-22. (c) Quantification of ventricular ejection  
1514 fraction % in uninjured and injured *Tg(myI7:GFP;csfr1a:gal4;UAS:NfsB-mCherry)*  
1515 larvae per macrophage ablation group, n=10-12. (d) Representative GFP surface-  
1516 renders of light-sheet-acquired z-stacks of injured ventricles from *irf8+/+* and *irf8-/-*  
1517 *Tg(myI7:GFP)* larvae. Abluminal myocardial surface is shown at 6 hpi (left) and  
1518 abluminal and luminal surfaces shown at 48 hpi following regeneration (middle &  
1519 right). White arrow-heads = laser lesion. (e) Quantification of mean lesion size in  
1520 injured *irf8+/+* and *irf8-/-* *Tg(myI7:GFP)* larvae, n=15. (f) Quantification of ventricular  
1521 ejection fraction % in uninjured and injured *irf8+/+* and *irf8-/-* *Tg(myI7:GFP)* larvae  
1522 n=15-20. (g) Time-lapse GFP-surface-rendered stills of an injured *Tg(myI7:GFP)*  
1523 ventricle from 6 hpi. White box = zoom panel, white arrow-heads = myocardial buds,  
1524 cyan arrow-head = myocardial bridge. (h) Time-lapse stills of an injured  
1525 *Tg(myI7:mKateCAAX;myI7:h2b-GFP)* ventricle from 2.5 hpi. White box = zoom  
1526 panel, white arrow-heads = cell-cell junctions \* $p \leq 0.05$ , \*\*\* $p \leq 0.001$  2way ANOVA  
1527 followed by Holm-Sidak's Post-hoc tests. Scale bars = 50  $\mu\text{m}$   
1528

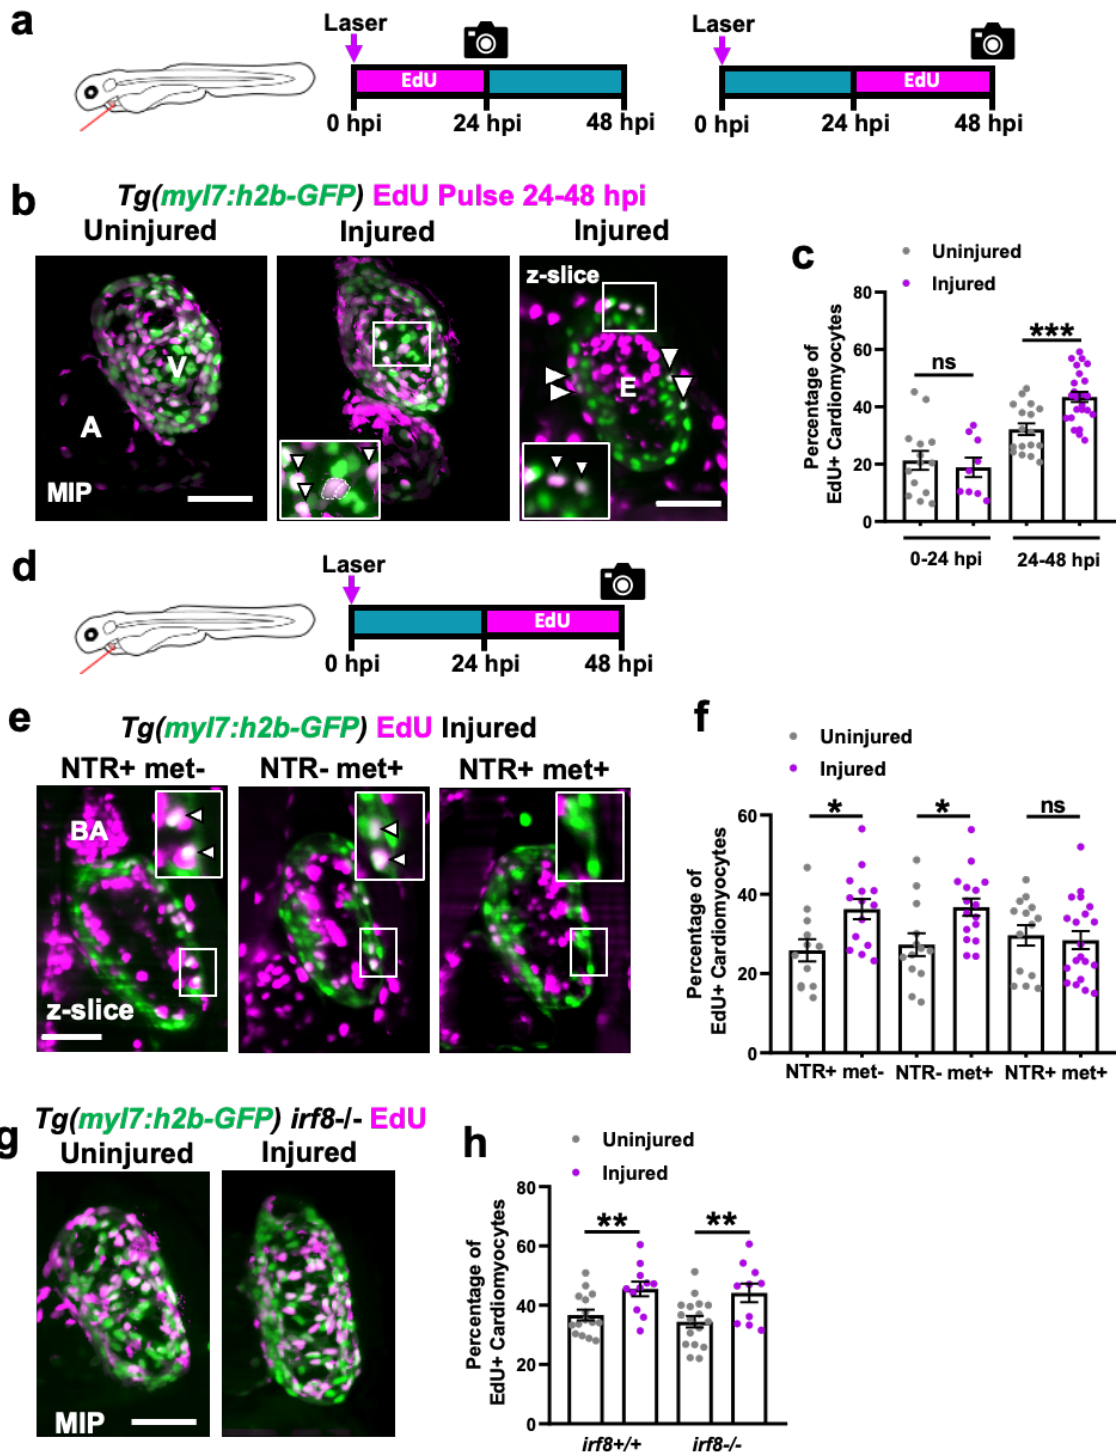

1529

1530 **Figure 5: Macrophage ablation abolishes injury-dependent cardiomyocyte**  
 1531 **proliferation.**

1532 (a) Schematic illustrating EdU pulse strategy for labelling proliferating

1533 cardiomyocytes over 0-24 hpi (left) and 24-48 hpi (right). (b) Representative images

1534 of EdU-stained hearts from *Tg(myI7:h2b-GFP)* acquired by light-sheet microscopy at

1535 48 hpi. Non-myocardial EdU signal is excluded post-acquisitionally to allow

1536 interpretable maximal intensity projections (MIPs). A = atrium, v = ventricle, white  
1537 boxes = zoom panels, white arrow-heads = EdU+ cardiomyocyte nuclei and dashed  
1538 line = outline of dividing cardiomyocyte daughter nuclei. (c) Quantification of the  
1539 percentage of ventricular EdU+ cardiomyocytes in uninjured and injured  
1540 *Tg(myI7:h2b-GFP)* hearts pulsed over 0-24 hpi or 24-48 hpi. \*\*\* $p \leq 0.001$  Unpaired t  
1541 test. (d) Schematic illustrating EdU pulse strategy for labelling proliferating  
1542 cardiomyocytes over 24-48 hpi in *Tg(myI7:h2b-GFP;csfr1a:gal4;UAS:NfsB-mCherry)*  
1543 larvae per standard macrophage ablation groups. (e) Representative images of EdU-  
1544 stained hearts from *Tg(myI7:h2b-GFP;csfr1a:gal4;UAS:NfsB-mCherry)* acquired by  
1545 light-sheet microscopy at 48 hpi. White boxes = zoom panels, white arrow-heads =  
1546 EdU+ cardiomyocyte nuclei and BA = bulbous arteriosus. (f) Quantification of the  
1547 percentage of ventricular EdU+ cardiomyocytes in uninjured and injured  
1548 *Tg(myI7:h2b-GFP;csfr1a:gal4;UAS:NfsB-mCherry)* hearts pulsed over 24-48 hpi.  
1549 \* $p \leq 0.05$  Kruskal-Wallis test and Dunn's multiple comparison Post-hoc test. (g)  
1550 Representative images of uninjured and injured EdU-stained hearts from *irf8-/-*  
1551 *Tg(myI7:h2b-GFP)* acquired by light-sheet microscopy at 48 hpi. Non-myocardial  
1552 EdU signal is excluded post-acquisitionally to allow interpretable maximal intensity  
1553 projections (MIPs). (h) Quantification of the percentage of ventricular EdU+  
1554 cardiomyocytes in uninjured and injured *irf8+/+* and *irf8-/-* *Tg(myI7:h2b-GFP)* hearts  
1555 pulsed 24-48 hpi. Scale bars = 50  $\mu\text{m}$ . \*\* $p \leq 0.01$  Unpaired t test  
1556

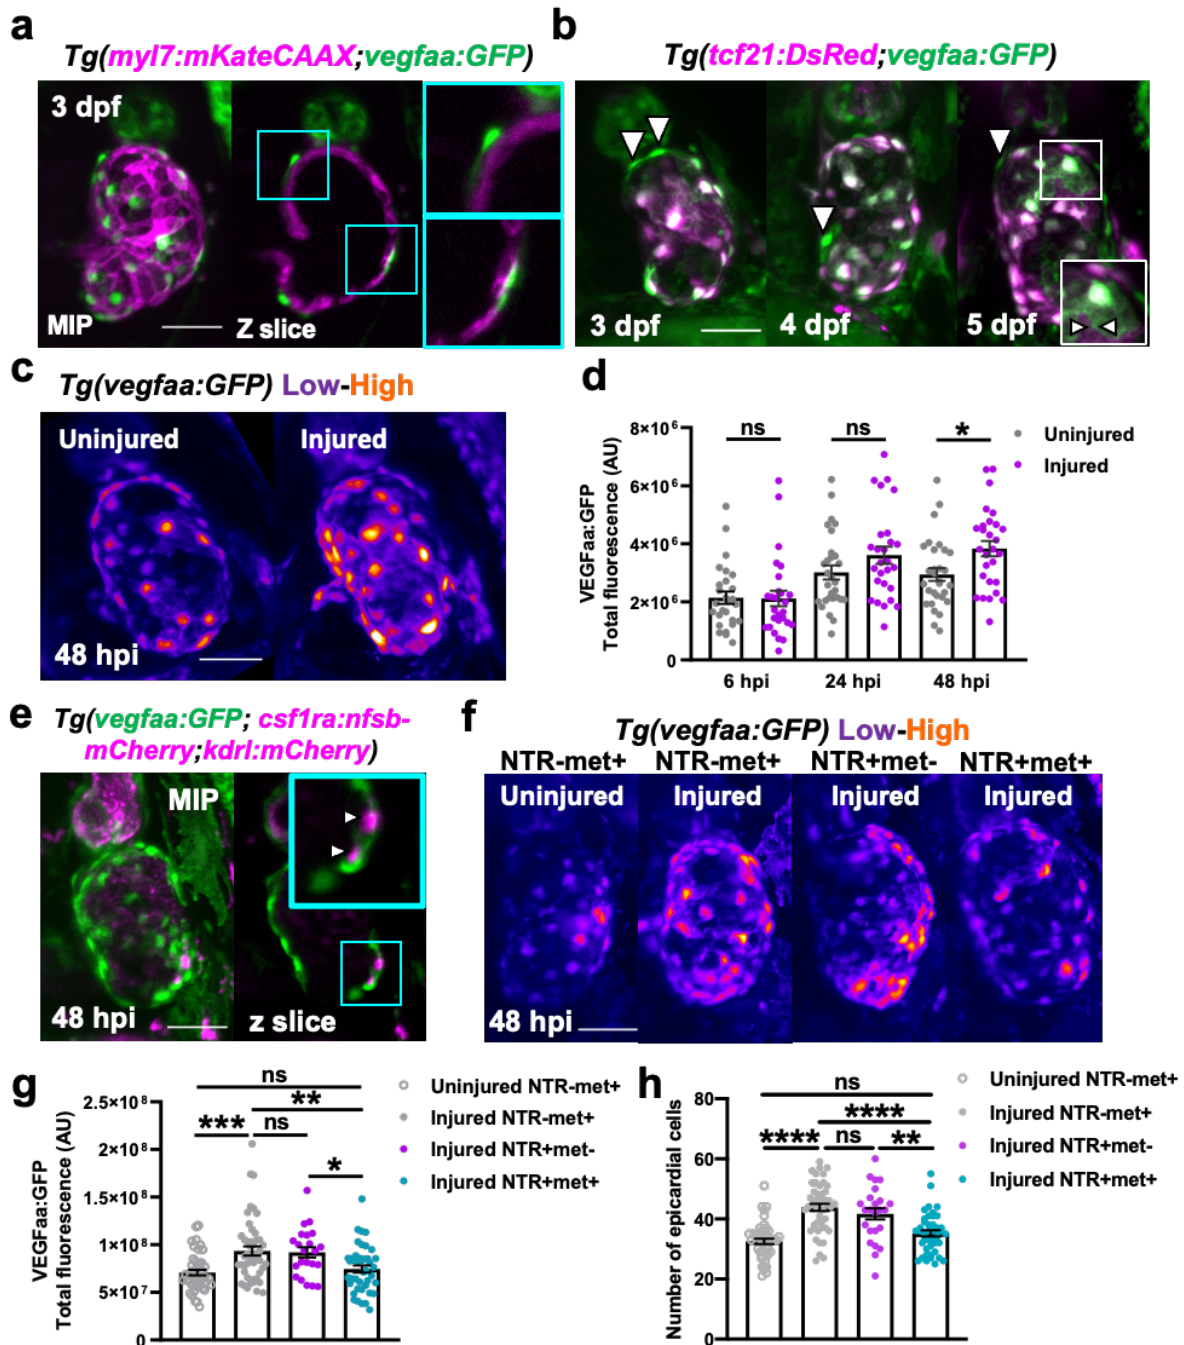

1557

1558

1559 **Figure 6: Macrophages stimulate epicardial expansion following cardiac injury.**

1560 (a) Representative image of an uninjured 3 dpf ventricle from a  
 1561 *Tg(myI7:mKateCAAX;myI7:h2b-GFP)* larva acquired by light-sheet microscopy  
 1562 showing vegfaa+ cells (green) overlying myocardium (magenta). Cyan box = zoom  
 1563 panel. (b) Representative images of 3, 4 and 5 dpf ventricles from a  
 1564 *Tg(tcf21:DsRed;vegfaa:GFP)* larvae acquired by light-sheet microscopy showing  
 1565 high colocalization of vegfaa with epicardial marker tcf21. White arrow-heads =

1566 vegfaa+tcf21- epicardial cells and white box = zoom panel. (c) Representative  
1567 images of uninjured and injured ventricles from *Tg(vegfaa:GFP)* larvae acquired at  
1568 48 hpi by light-sheet microscopy. Heat LUT applied to highlight increased intensity of  
1569 epicardial vegfaa:GFP in injured hearts. (d) Quantification of total ventricular  
1570 VEGFaa:GFP fluorescence in uninjured and injured hearts over standard injury  
1571 model timepoints, n=28-30. \* $p \leq 0.05$  One way ANOVA followed by Holms-Sidak's  
1572 multiple comparison Post-hoc tests. (e) Representative image of a ventricle from a  
1573 *Tg(vegfaa:GFP;csfr1a:gal4;UAS:NfsB-mCherry;kdrl:hsa.HRAS-mCherry)* 48 hpi  
1574 showing macrophages in the epicardial-myocardial niche (white arrow-heads). Cyan  
1575 box = zoom panel. (f) Representative images of uninjured and injured ventricles from  
1576 *Tg(vegfaa:GFP;csfr1a:gal4;UAS:NfsB-mCherry)* larvae from metronidazole-  
1577 nitroreductase macrophage ablation groups at 48 hpi. A heat LUT is applied to  
1578 highlight increase in overall fluorescence in injured groups besides NTR+met+. (g)  
1579 Quantification of total vegfaa:GFP fluorescence (g) and epicardial cell number (h) in  
1580 uninjured and injured ventricles from *Tg(vegfaa:GFP;csfr1a:gal4;UAS:NfsB-*  
1581 *mCherry)* larvae from metronidazole-nitroreductase macrophage ablation groups at  
1582 48 hpi. Scale bars = 50  $\mu\text{m}$ , n=46. \* $p \leq 0.05$ , \*\* $p \leq 0.01$ , \*\*\* $p \leq 0.001$  One way ANOVA  
1583 followed by Holms-Sidak's multiple comparison Post-hoc tests.  
1584

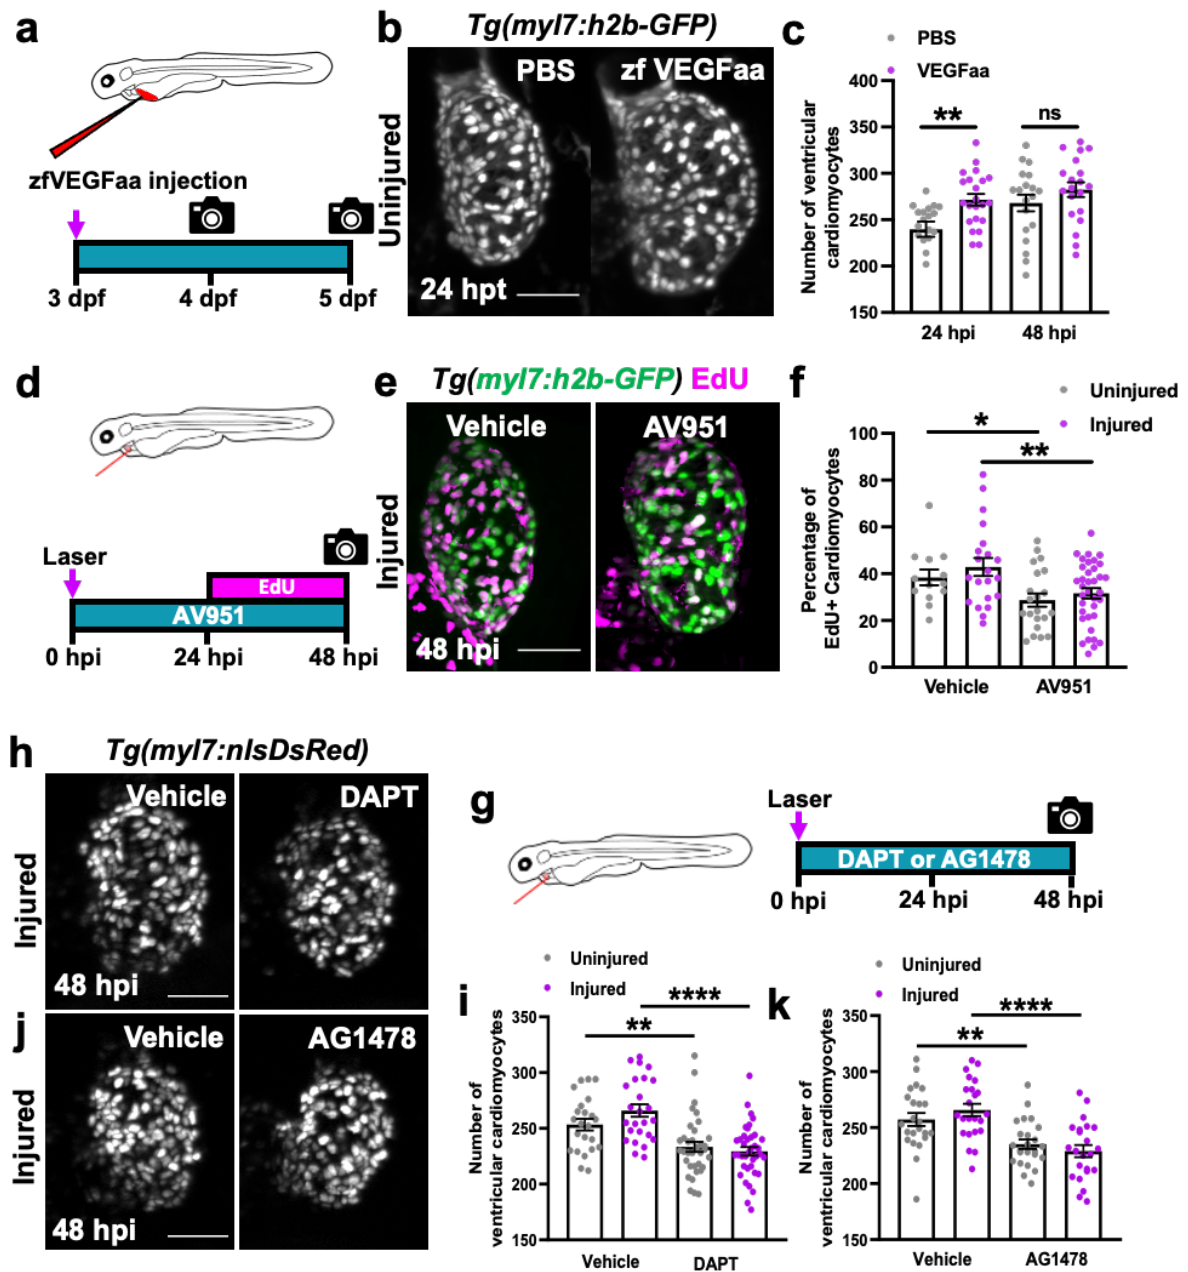

1585

1586

**Figure 7: VEGFaa signalling is both sufficient and necessary to drive cardiomyocyte proliferation.**

1587

1588

1589

1590

1591

1592

1593

1594

1595

(a) Schematic illustrating zfVEGFaa treatment strategy via microinjection into the common cardinal vein of uninjured larvae at 72 hpi. (b) Representative light-sheet-acquired images of *Tg(myI7:h2b-GFP)* larvae at 24 hpi treated with PBS 0.1% BSA or zfVEGFaa 0.1% BSA injection. (c) Quantification of ventricular cardiomyocyte number in *Tg(myI7:h2b-GFP)* larvae at 24 and 48 hpi treated with PBS 0.1% BSA or zfVEGFaa 0.1% BSA injection, n=20. \*\* $p \leq 0.01$  unpaired t test. (d) Schematic illustrating AV951 treatment and EdU pulsing strategy for uninjured and injured larvae. (e) Representative images of injured ventricles from *Tg(myI7:h2b-GFP)*



1596 larvae, EdU stained and bathed in vehicle or AV951, imaged at 48 hpi by light-sheet  
1597 microscopy. Non-myocardial EdU signal is excluded post-acquisitionally to allow  
1598 interpretable maximal intensity projections (MIPs). (f) Quantification of the  
1599 percentage of EdU+ cardiomyocyte nuclei from uninjured and injured ventricles from  
1600 *Tg(myI7:h2b-GFP)* larvae, EdU stained and bathed in vehicle or AV951, n=13-36.  
1601 \* $p \leq 0.05$ , \*\* $p \leq 0.01$  unpaired t test. (g) Schematic illustrating the treatment strategy for  
1602 DAPT and AV951 bathing of uninjured and injured larvae. (h) Representative images  
1603 of injured *Tg(myI7:nlsDsRed)* larvae treated with vehicle or DAPT, acquired at 48 hpi  
1604 by light-sheet microscopy. (i) Quantification of ventricular cardiomyocyte number in  
1605 uninjured and injured *Tg(myI7:h2b-GFP)* larvae at 48 hpi treated with vehicle or  
1606 DAPT, n=24-40. \*\* $p \leq 0.01$ , \*\*\*\* $p \leq 0.0001$  Unpaired t test. (j) Representative images of  
1607 injured *Tg(myI7:nlsDsRed)* larvae treated with vehicle or AG1478, acquired at 48 hpi  
1608 by light-sheet microscopy. (k) Quantification of ventricular cardiomyocyte number in  
1609 uninjured and injured *Tg(myI7:h2b-GFP)* larvae at 48 hpi treated with vehicle or  
1610 AG1478, n=24. \*\* $p \leq 0.01$ , \*\*\*\* $p \leq 0.0001$  Unpaired t test. Scale bars = 50  $\mu\text{m}$ .  
1611

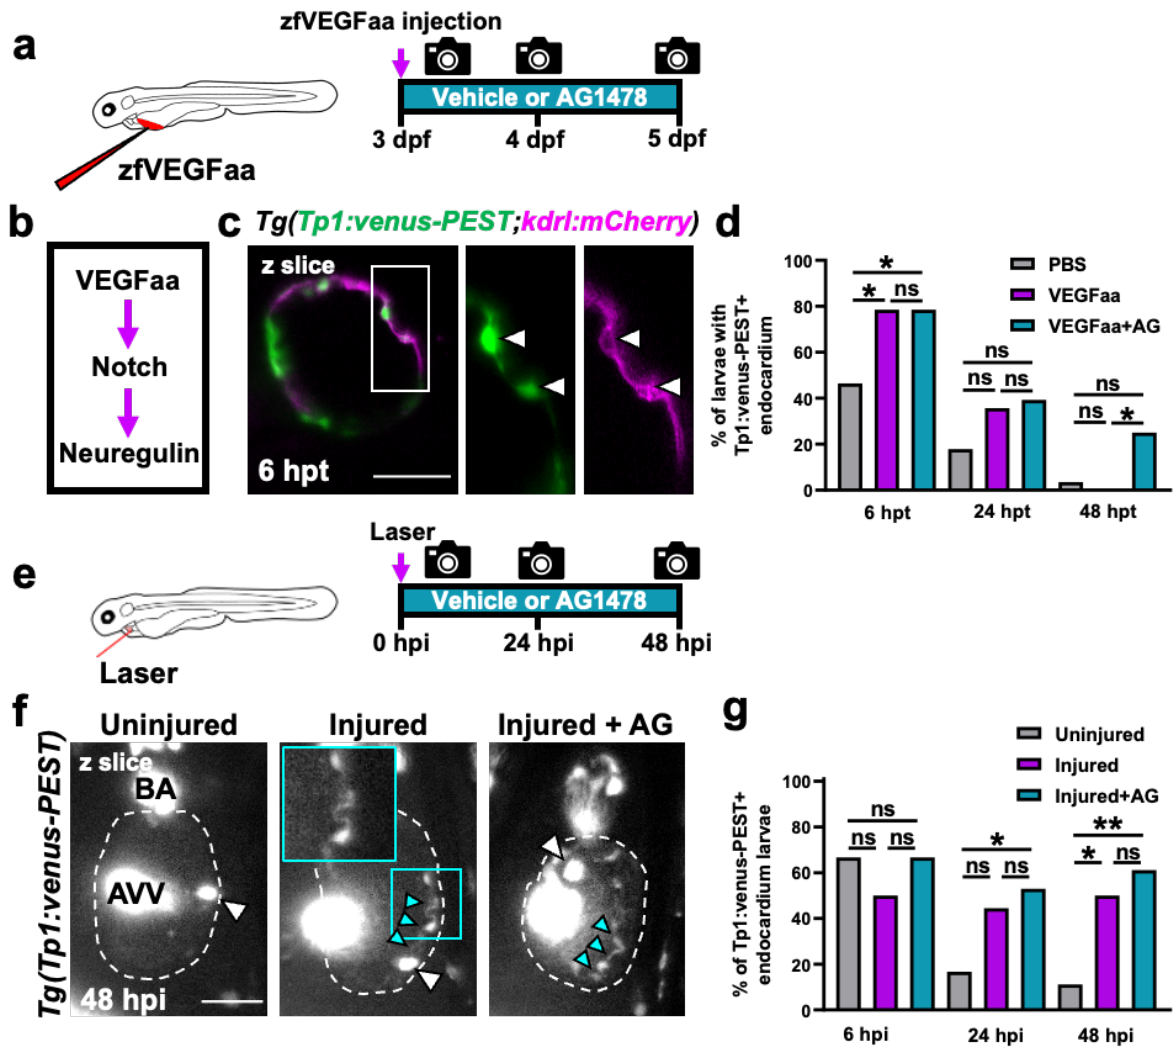

1612

1613

**Figure 8: VEGFaa acts upstream of endocardial notch signalling.**

1614

(a) Schematic illustrating the treatment strategy for the injection of uninjured larvae

1615

with zfVEGFaa and continuous bathing in AG1478 solution. (b) Hypothesised

1616

signalling pathway active in uninjured and injured larval hearts driving cardiomyocyte

1617

proliferation. (c) Representative light-sheet-acquired z plane showing notch

1618

expression colocalising with endocardium in *Tg(Tp1:venus-PEST;kdrl:hsa.HRAS-*

1619

*mCherry)*, abbreviated in the figure to *Tg(Tp1:venus-PEST;kdrl:has.HRAS-mCherry)*.

1620

AG1478 abbreviated to AG, white box = zoom panel. (d) Quantification of the

1621

proportion of larvae with notch+ endocardium at 6, 24, and 48 hpt following

1622

zfVEGFaa injection and bathing in AG1478, n=28. \* $p \leq 0.05$  Fisher's exact test. (e)

1623

Schematic illustrating the treatment strategy for the laser injury of larvae and continuous

1624

bathing in AG1478 solution. (f) Representative z plane images of uninjured, injured

1625

and injured AG-treated ventricles from *Tg(tp1:venus-PEST)* larvae acquired by light-

1626

sheet microscopy at 48 hpi. BA = bulbous arteriosus, AVV = atrioventricular valve,

1627 white arrow-heads =laterally inhibited cardiomyocytes, cyan arrow-heads = notch+  
1628 endocardium and cyan box = zoom panel. (g) Quantification of the proportion of  
1629 larvae with notch+ endocardium at 6, 24, and 48 hpt following laser injury and  
1630 bathing in AG1478, n=18. \* $p \leq 0.05$ , \*\* $p \leq 0.01$  Fisher's exact test. Scale bars = 50  $\mu\text{m}$ .  
1631

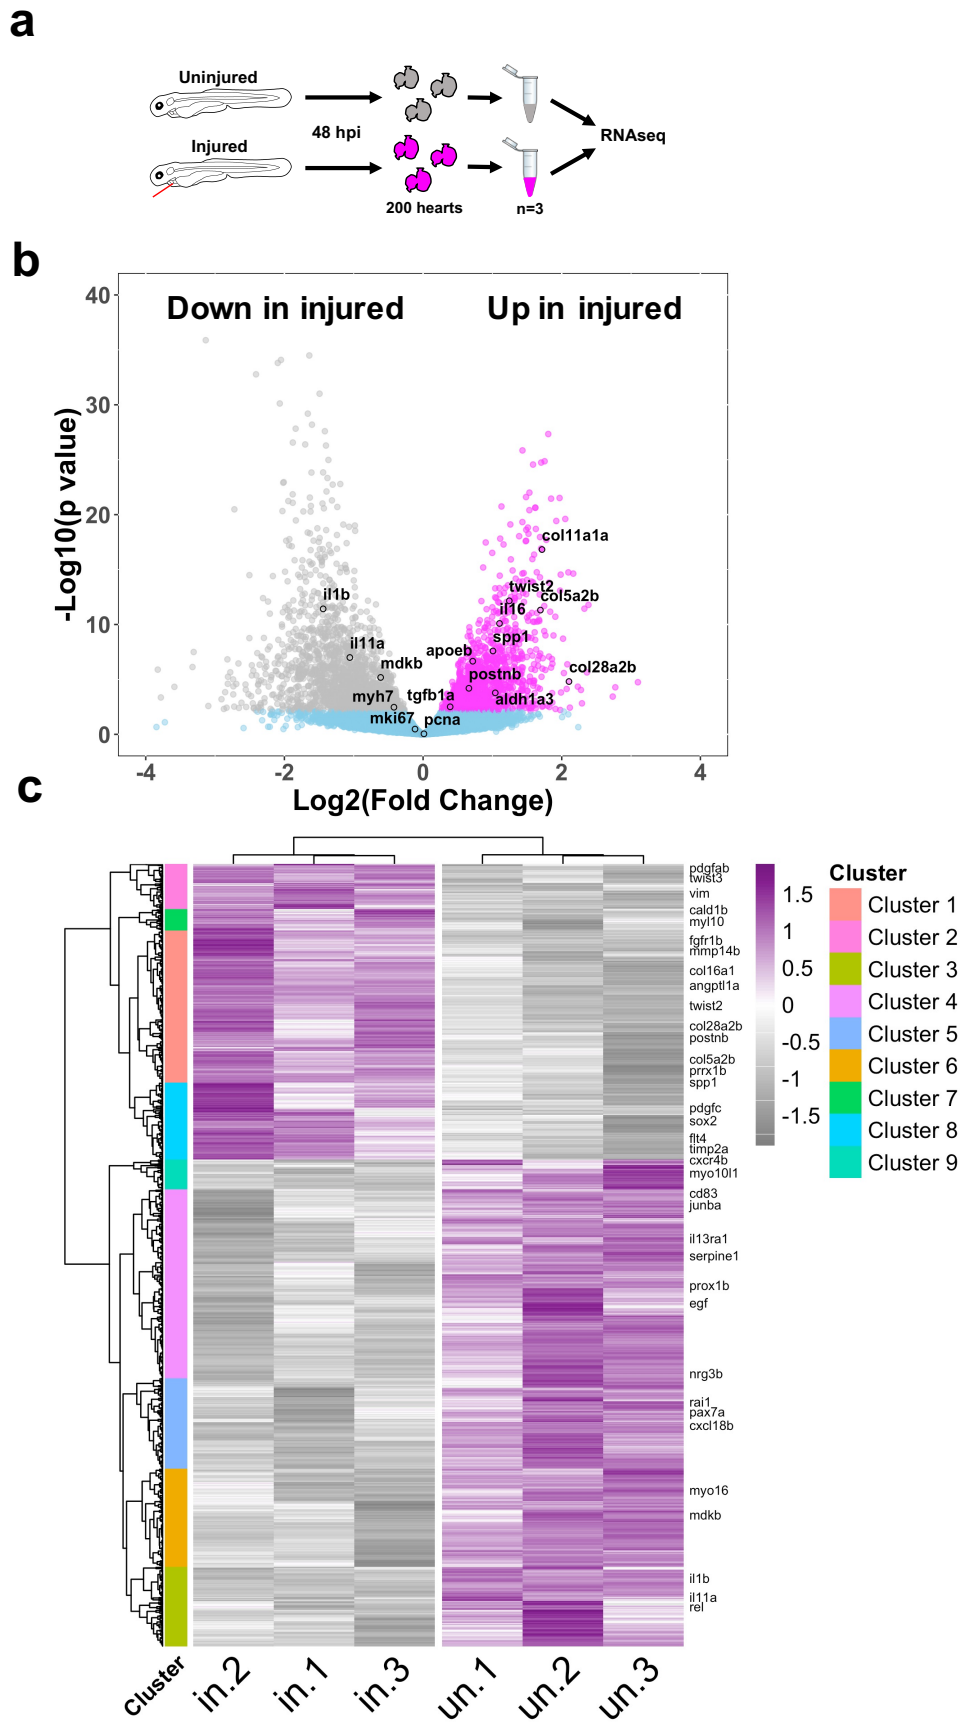

1632

1633

**Figure 9: RNAseq analysis of larval hearts following injury**

1634 (a) Schematic illustrating the extraction of uninjured and injured hearts at 48 hpi and  
1635 the pooling of 200 hearts per biological replicate for RNAseq. n=3 (b) Volcano plot  
1636 showing the  $\text{Log}_2(\text{Fold Change})$  and  $-\text{Log}_{10}(\text{p value})$  for transcripts of each detected  
1637 gene. Genes whose adjusted p values fall below 0.05 are deemed statistically non-  
1638 significant and coloured blue. Genes up regulated in injured hearts are coloured  
1639 magenta and those upregulated in uninjured hearts are coloured grey. (c) Heatmap  
1640 displaying statistically significantly differentially expressed genes with a  $\text{Log}_2(\text{Fold}$   
1641  $\text{Change}) > 0.5$ . Genes were hierarchically clustered by Pearson correlation with z  
1642 scaling. Clusters are indicated on the left with their dendrogram. Magenta = high  
1643 expression and grey = low expression. Genes with relevance to cardiac regeneration  
1644 are highlighted as annotations on the right of the plot. n=3

1645

1646

1647

1648

1649

1650

1651 **Supplementary figures:**

1652

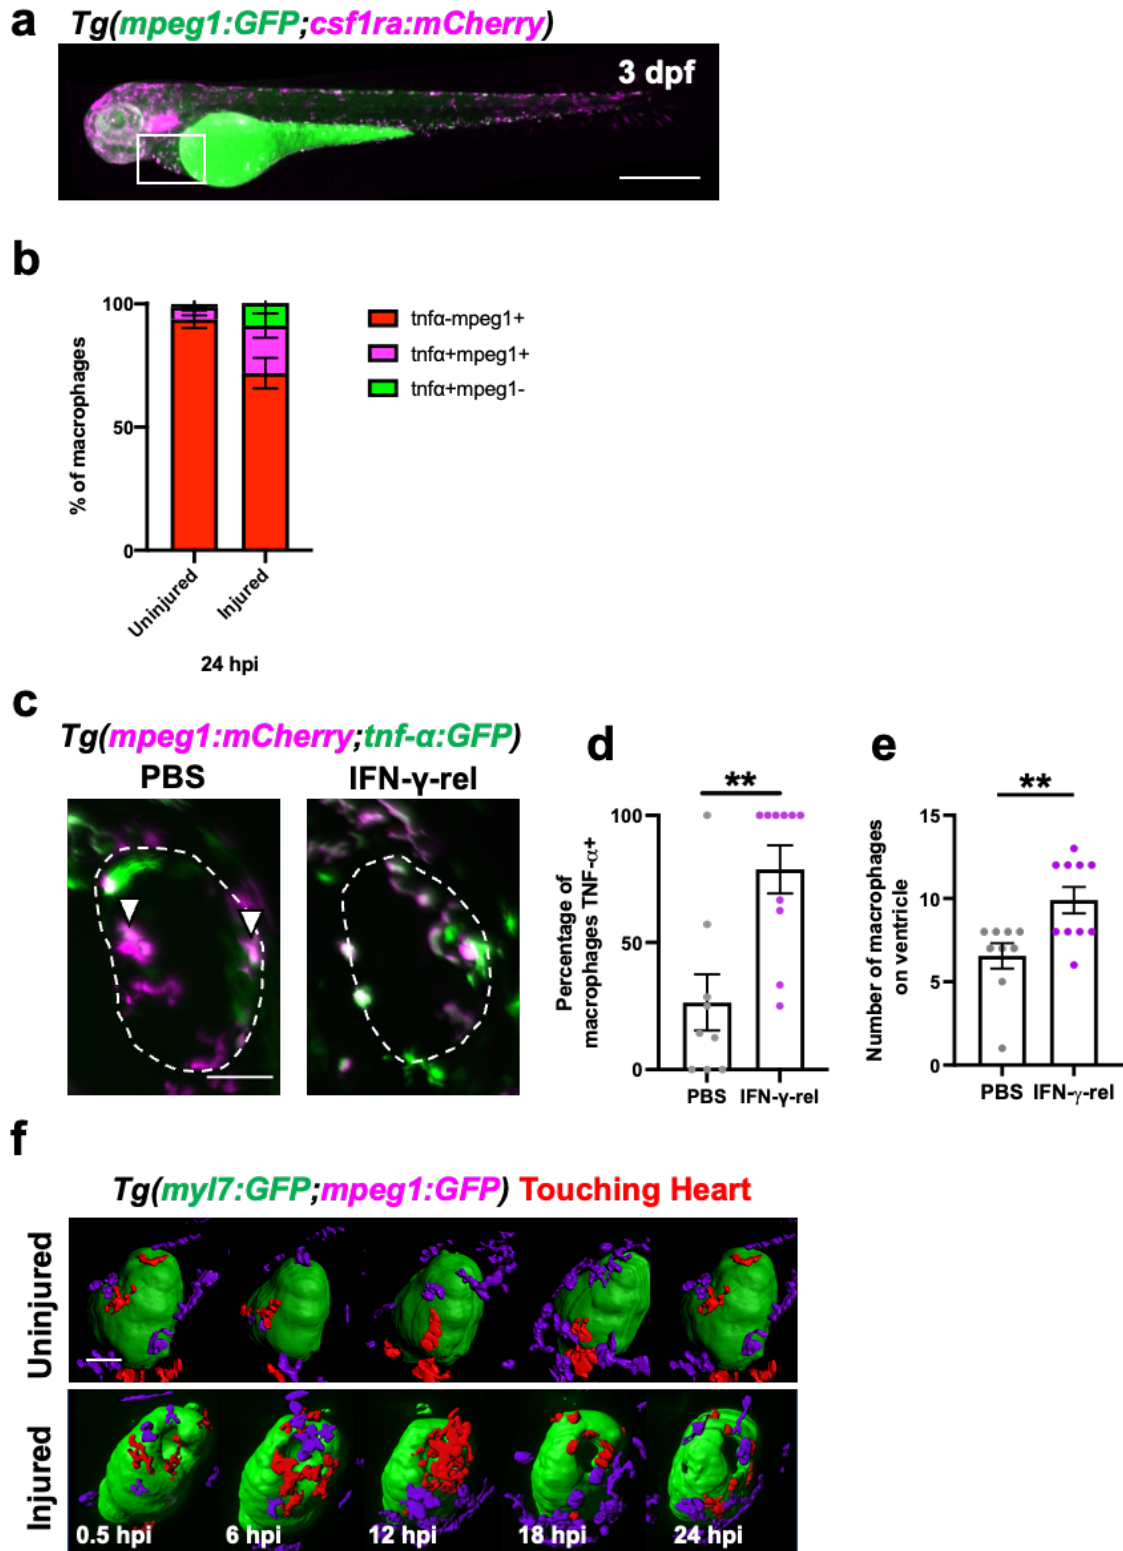

1653

1654 **Supplementary figure 1: Cardiac macrophage phenotype in larval zebrafish is**  
 1655 **plastic and can be polarised to TNF- $\alpha$ + by IFN- $\gamma$ -rel.**

1656 (a) Representative epifluorescence image of a 3 dpf

1657 *Tg(mpeg1:GFP;csf1ra:gal4;UAS:NfsB-mCherry)* abbreviated to

1658 *Tg(mpeg1:GFP;csf1ra:mCherry)* in the figure showing an anterior-posterior polarity  
1659 in macrophage expression of *csf1ra* (*csf1ra* marking higher proportion of anterior  
1660 macrophages). White box = indicated pericardial area. Scale bar = 500 $\mu$ m. (b)  
1661 Quantification of the proportion of macrophages that are *tnf $\alpha$ -mpeg1+*, *tnf $\alpha$ +mpeg1+*  
1662 and *tnf $\alpha$ +mpeg1-* on hearts in uninjured and injured larvae at 24 hpi. (c)  
1663 Representative images of hearts from *Tg(mpeg1:mCherry;tnf- $\alpha$ :GFP)* larvae at 24  
1664 hpi injected with PBS or IFN- $\gamma$ -rel. White dashed line = outline of the ventricle and  
1665 white arrow-heads = *tnf $\alpha$ +mpeg1+* macrophages. Scale bar = 50 $\mu$ m. (d)  
1666 Quantification of the proportion of *tnf- $\alpha$ +* macrophages on hearts at 24 hpi upon  
1667 injection at 0 hpi with PBS or IFN- $\gamma$ -rel. (e) Quantification of the number of  
1668 macrophages on the injured ventricle at 24 hpi upon injection at 0 hpi with PBS or  
1669 IFN- $\gamma$ -rel. (f) Time-lapse stills of *Tg(myI7:GFP;mpeg1:mCherry)* hearts acquired by  
1670 heart-synchronised light-sheet microscopy, surface rendered and colour coded to  
1671 show myocardium in green, macrophages on the heart in red and macrophages  
1672 elsewhere in purple. Macrophages can be seen to change from stellate to rounded  
1673 over time following injury. Scale bar = 50 $\mu$ m.  
1674

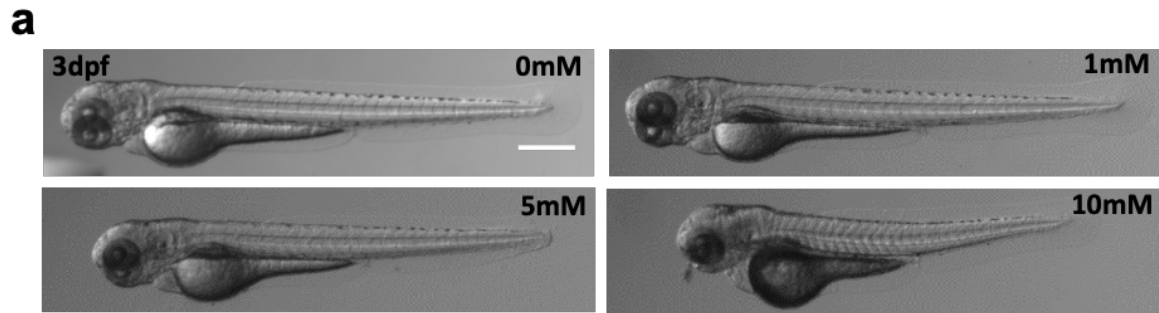

**b** *Tg(csfr1:gal4;UAS:NfsB-mCherry;mpx:GFP)*

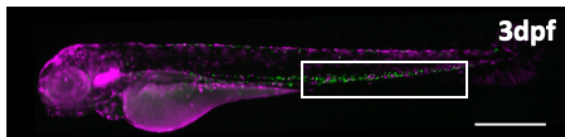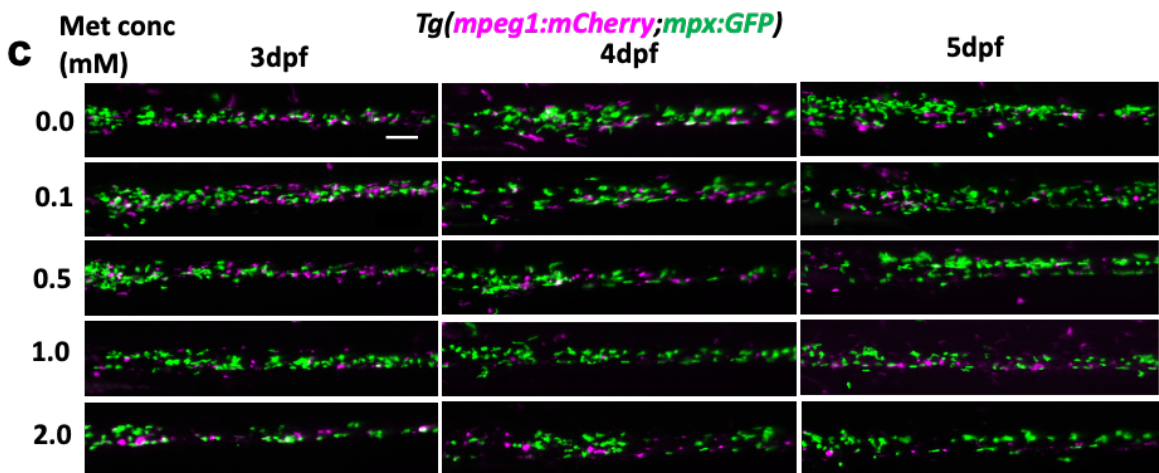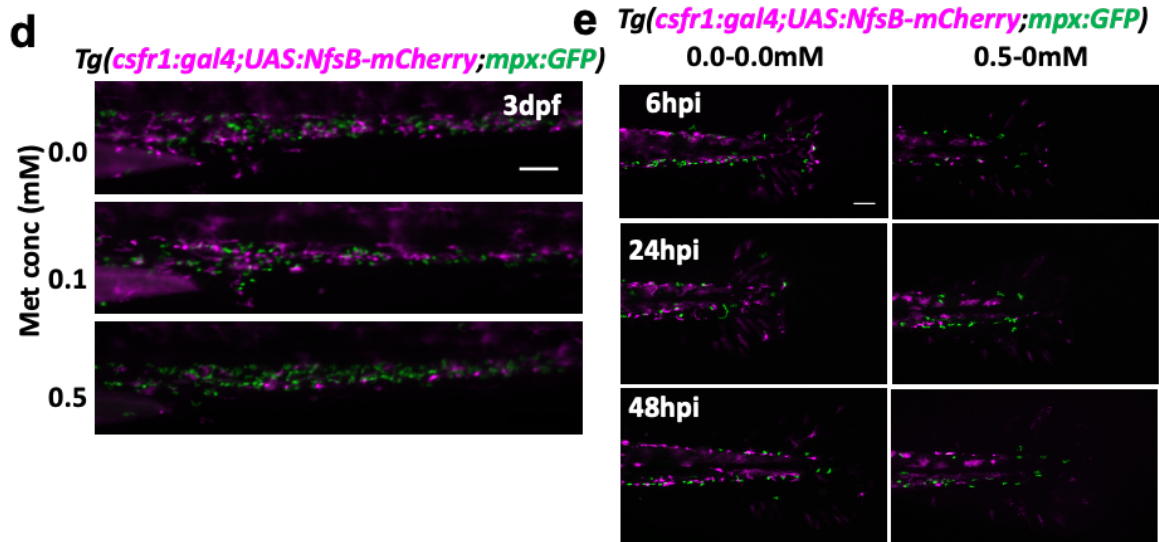

1675

1676 **Supplementary figure 2: Optimisation of metronidazole dose for macrophage**  
1677 **ablation.**

1678 (a) Representative brightfield images of larvae phenotype after incubation in the  
1679 concentrations of metronidazole 2-3 dpf indicated in the figure. Scale bar = 500 $\mu$ m.



1680 (b) Representative epifluorescence image of a 3 dpf *Tg(csf1ra:gal4;UAS:NfsB-*  
1681 *mCherry;mpx:GFP)* larva, white box = zoom panel, scale bar = 500 $\mu$ m. (c)  
1682 Representative epifluorescence images of CHT (region indicated by white box in (b))  
1683 at 3, 4 and 5 dpf following treatment with metronidazole (concentrations indicated in  
1684 figure) 2-3 dpf. Neutrophils = green and macrophages = magenta. No NTR  
1685 expression therefore toxicity to immune cells can be assessed, scale bar = 100 $\mu$ m  
1686 (d) Representative epifluorescence images of the CHT in *Tg(csf1ra:gal4;UAS:NfsB-*  
1687 *mCherry;mpx:GFP)* larvae incubated in the doses of metronidazole indicated in the  
1688 figure 2-3 dpf. Scale bar = 100 $\mu$ m. (e) Representative epifluorescence images of  
1689 *Tg(csf1ra:gal4;UAS:NfsB-mCherry;mpx:GFP)* tail fins resected at 72 hpi following  
1690 incubation in 0.5mM metronidazole or vehicle (0mM). The macrophage response  
1691 (magenta) can be seen to be blocked only in the metronidazole treated group  
1692 whereas the neutrophil response is unaffected. Scale bar = 100 $\mu$ m.  
1693

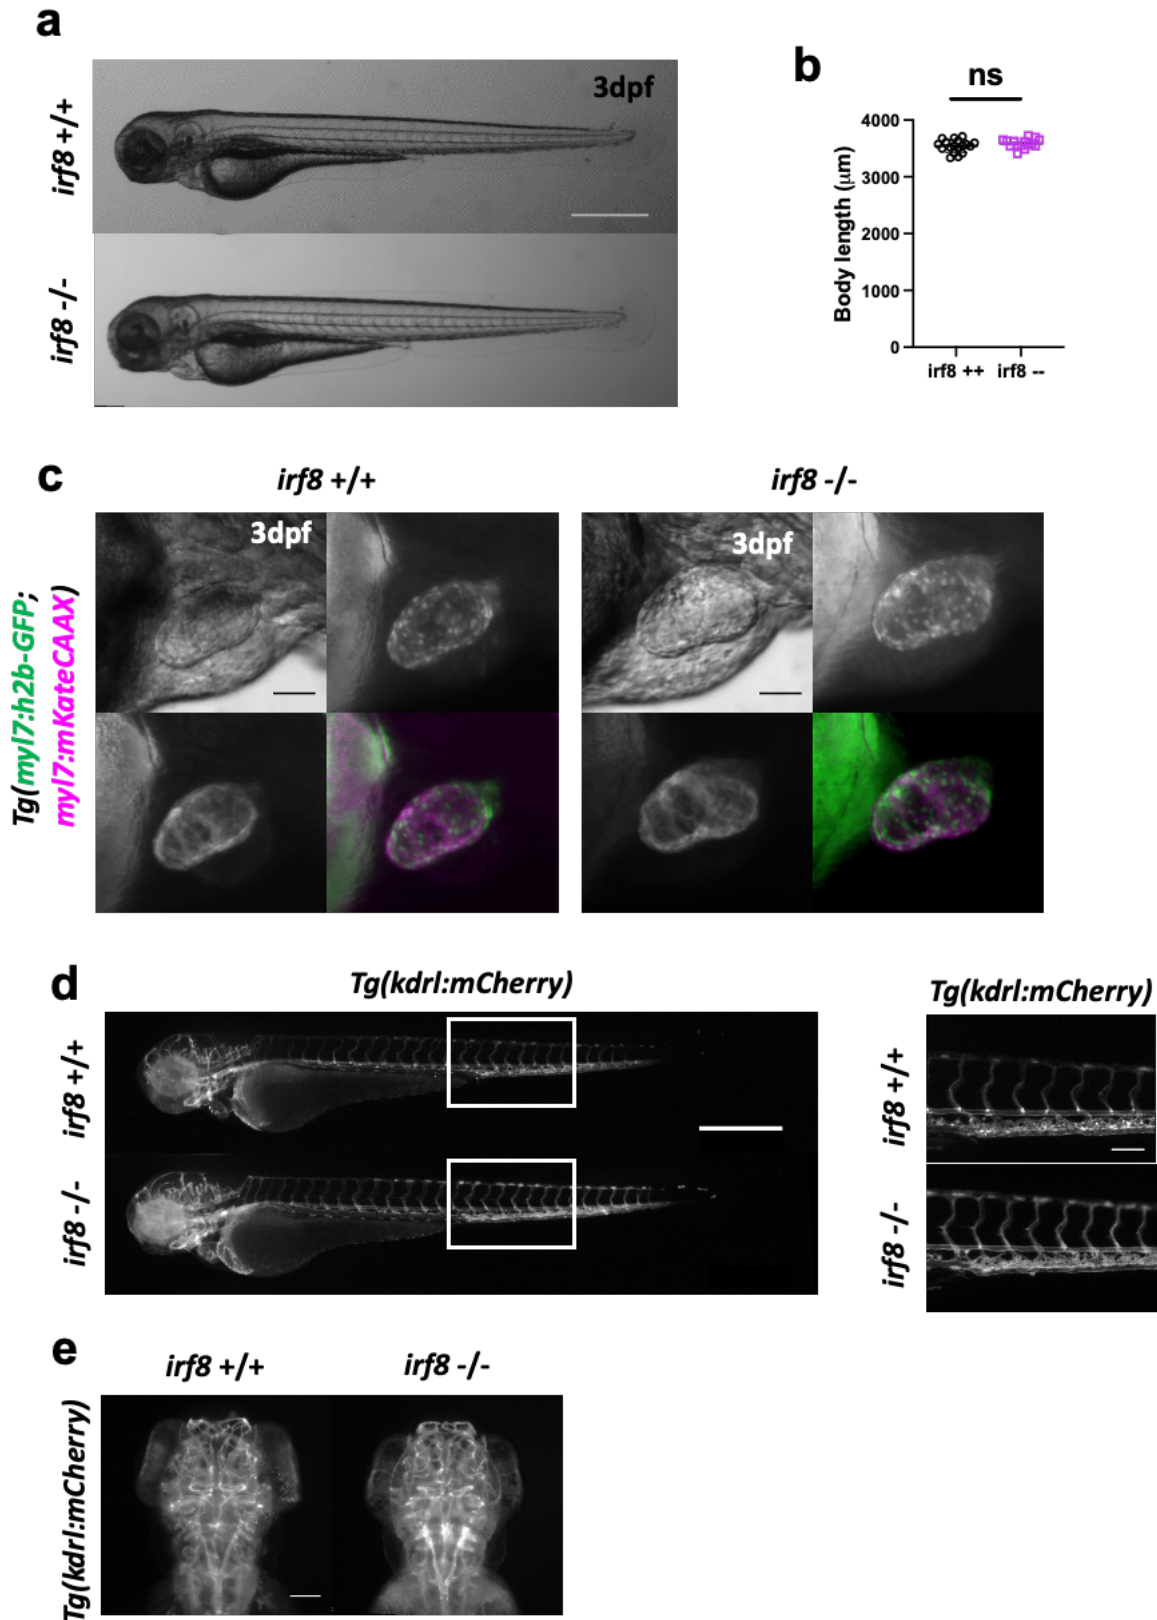

1694

1695 **Supplementary figure 3: *irf8*<sup>-/-</sup> mutants show no overt adverse phenotype.**

1696 (a) Brightfield whole larvae image showing no morphological difference between *irf8*<sup>-/-</sup>

1697 <sup>-/-</sup> and *irf8*<sup>+/+</sup> at 3 dpf, scale bar = 500 $\mu\text{m}$ . (b) Quantification of body length in *irf8*<sup>+/+</sup>

1698 and *irf8*<sup>-/-</sup> showing no difference between genotypes. (c) Brightfield and  
 1699 epifluorescence images of a laterally viewed heart from *irf8*<sup>+/+</sup> and *irf8*<sup>-/-</sup>  
 1700 *Tg(myl7:h2b-GFP;myl7:mKateCAAX)* larvae at 3 dpf showing no cardiac  
 1701 abnormalities in *irf8*<sup>-/-</sup> larvae. Scale bar = 50 $\mu$ m (d) Epifluorescence whole larvae  
 1702 image of *irf8*<sup>+/+</sup> and *irf8*<sup>-/-</sup> *Tg(kdrl:mCherry)* larvae showing no vascular  
 1703 abnormalities in *irf8*<sup>-/-</sup> larvae. Scale bar = 500 $\mu$ m. White boxes = zoom panels (right,  
 1704 scale bar = 100 $\mu$ m). (e) Dorsal view representative epifluorescence images of cranial  
 1705 vasculature in *Tg(kdrl:mCherry)* showing no difference between *irf8*<sup>+/+</sup> and *irf8*<sup>-/-</sup>  
 1706 larvae, scale bar = 100 $\mu$ m.  
 1707

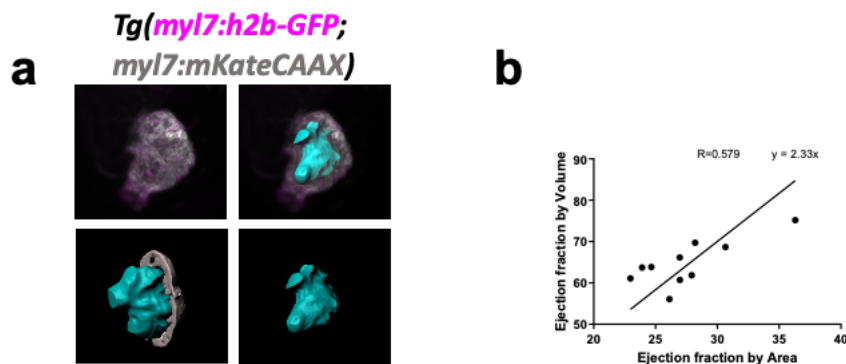

1708  
 1709 **Supplementary figure 4: Ejection fraction by area is proportional to ejection**  
 1710 **fraction by volume.**

1711 (a) Representative IMARIS-generated image showing a rendered ventricular  
 1712 myocardium (grey render), rendered chamber volume (cyan) and MIP of 3D heart  
 1713 synchronised light-sheet scan of a 3 dpf heart (ventricle) in diastole. Image acquired  
 1714 from a *Tg(myl7:h2b-GFP;myl7:mKateCAAX)* larva. (b) Quantification of ejection  
 1715 fraction by area (calculated by diastolic and systolic lateral brightfield) and by volume  
 1716 (calculated by surface renders of luminal volumes in diastole and systole) per fish.  
 1717

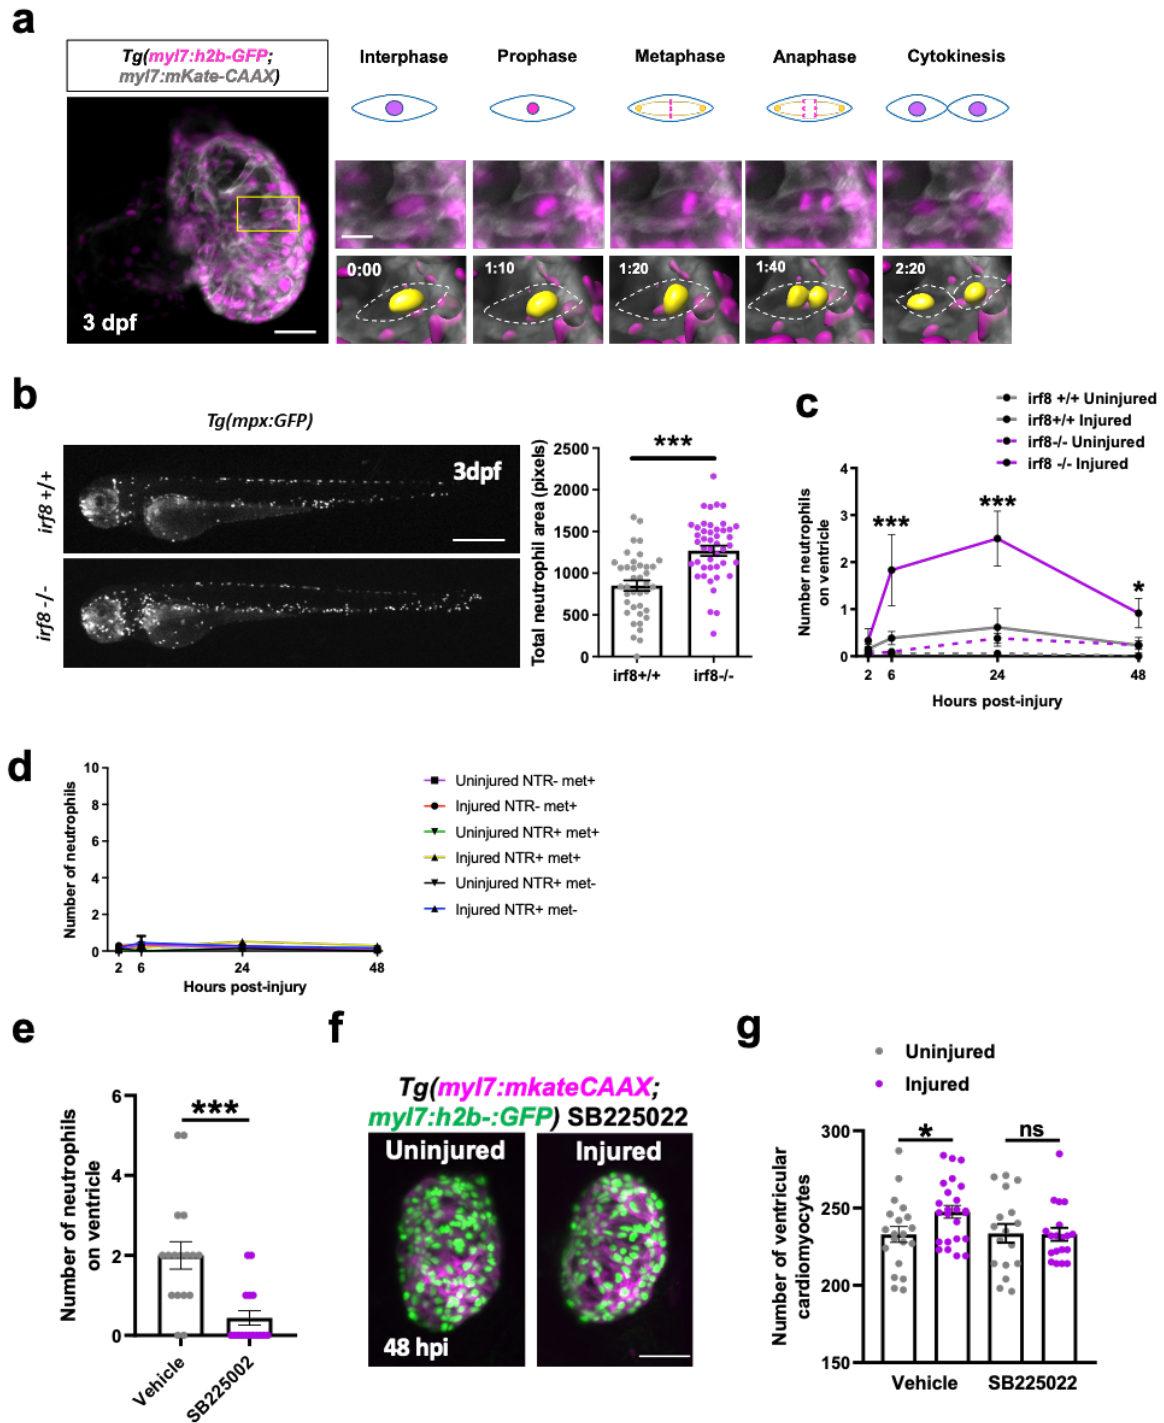

1718

1719 **Supplementary figure 5: *irf8*<sup>-/-</sup> larvae have a larger neutrophil response to**  
 1720 **cardiac injury than *irf8*<sup>+/+</sup>.**

1721 (a) Representative stills from heart synchronised light-sheet timelapse of a laser  
 1722 injured 3 dpf *Tg(myl7:h2b-GFP;myl7:mKateCAAX)* larva showing an example of  
 1723 each phase of complete cell division of a single cardiomyocyte, typical of larval  
 1724 hearts. Yellow box = zoom panel, left scale bar = 30  $\mu$ m and right scale bar = 10  $\mu$ m.  
 1725 Timestamps post-injury indicated in figure. (b) Representative whole larva

1726 epifluorescence image of *irf8*<sup>-/-</sup> and *irf8*<sup>+/+</sup> *Tg(mpx:GFP)* larvae showing *irf8*<sup>-/-</sup> to  
1727 have greater global neutrophil numbers (scale bar = 500  $\mu$ m), quantified in the graph  
1728 (right). \*\*\* $p \leq 0.001$ . t test, n=39-46. (c) Quantification of neutrophil numbers at the  
1729 ventricle in uninjured and injured *irf8*<sup>+/+</sup> and *irf8*<sup>-/-</sup> larvae at the standard laser-injury  
1730 model timepoints showing *irf8*<sup>-/-</sup> larvae to have a significantly greater neutrophil  
1731 response, n=17-25. (d) Quantification of neutrophil numbers at the ventricle in  
1732 uninjured and injured NTR-met<sup>+</sup>, NTR+met<sup>+</sup> and NTR+met<sup>-</sup> larvae at the standard  
1733 laser-injury model timepoints showing all metronidazole-nitroreductase treatment  
1734 groups to have a minimal neutrophil response and therefore no neutrophil  
1735 compensation in the macrophage ablated group NTR+met<sup>+</sup>, n=17-24. (e)  
1736 Quantification of the number of recruited neutrophils at the injured ventricle in at 24  
1737 hpi in *Tg(myI7:h2b-GFP;myI7:mKateCAAX)* larvae bathed in vehicle or SB225002 -2  
1738 to 24 hpi showing SB225002 to significantly reduce neutrophil number, n=17. (f)  
1739 Representative light-sheet acquired images of uninjured and injured *irf8*<sup>-/-</sup>  
1740 *Tg(myI7:h2b-GFP;myI7:mKateCAAX)* ventricles at 48 hpi following treatment with  
1741 SB225002 -2 to 24 hpi, scale bar = 50  $\mu$ m. (g) Quantification of ventricular  
1742 cardiomyocyte number in uninjured and injured *irf8*<sup>-/-</sup> *Tg(yI7:h2b-*  
1743 *GFP;myI7:mKateCAAX)* ventricles at 48 hpi following treatment with vehicle or  
1744 SB225002 -2 to 24 hpi, n=17-20, \* $p \leq 0.05$ . t test  
1745

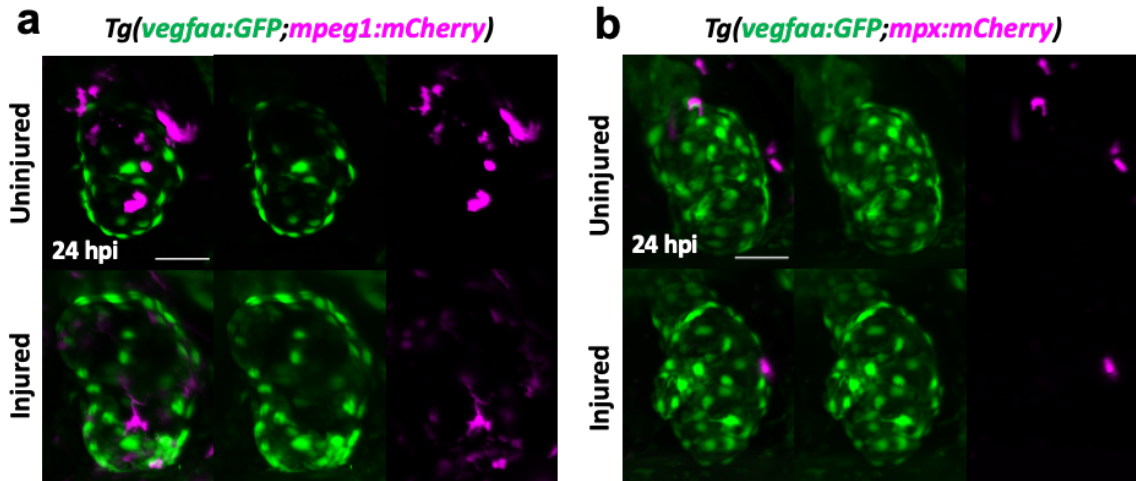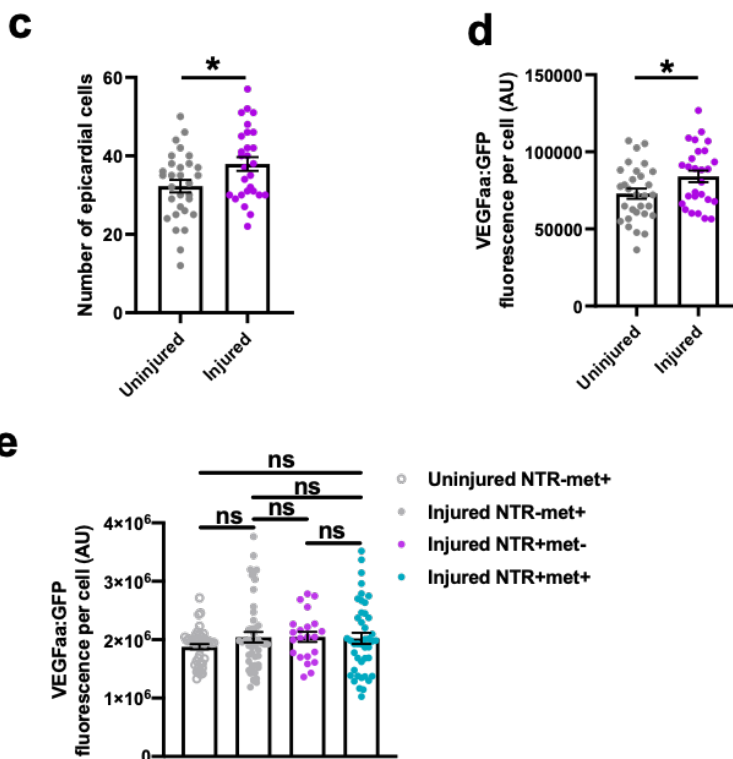

1746

1747

1748

**Supplementary figure 6: vegfaa:GFP expression does not colocalize with macrophages or neutrophils following larval heart injury.**

1749

1750

(a) Representative light-sheet-acquired image of an injured

1751

*Tg(vegfaa:GFP;mpeg1:mCherry)* heart 24 hpi showing VEGFaa expression only in

1752

the epicardium and not in macrophages, scale bar = 100 $\mu$ m. (b) Representative light-

1753

sheet-acquired image of an injured *Tg(vegfaa:GFP;mpx:mCherry)* heart 24 hpi

1754

showing VEGFaa expression only in the epicardium and not in neutrophils, scale bar

1755

= 100 $\mu$ m. (c) Quantification of the number of epicardial cells, as marked by

1756 vegfaa:GFP, on injured ventricles at 48 hpi in uninjured and injured larvae, n=30.  
 1757 \* $p \leq 0.05$  t test (d) Quantification of the average vegfaa:GFP expression of epicardial  
 1758 cells per cell, on injured ventricles at 48 hpi in uninjured and injured larvae, n=30.  
 1759 \* $p \leq 0.05$  t test (e) Quantification of average vegfaa:GFP fluorescence per cell in  
 1760 metronidazole-nitroreductase ablation model groups at 48 hpi, n=22-44. One-way  
 1761 ANOVA followed by Holm-Sidak's multiple comparisons Post-hoc test.  
 1762

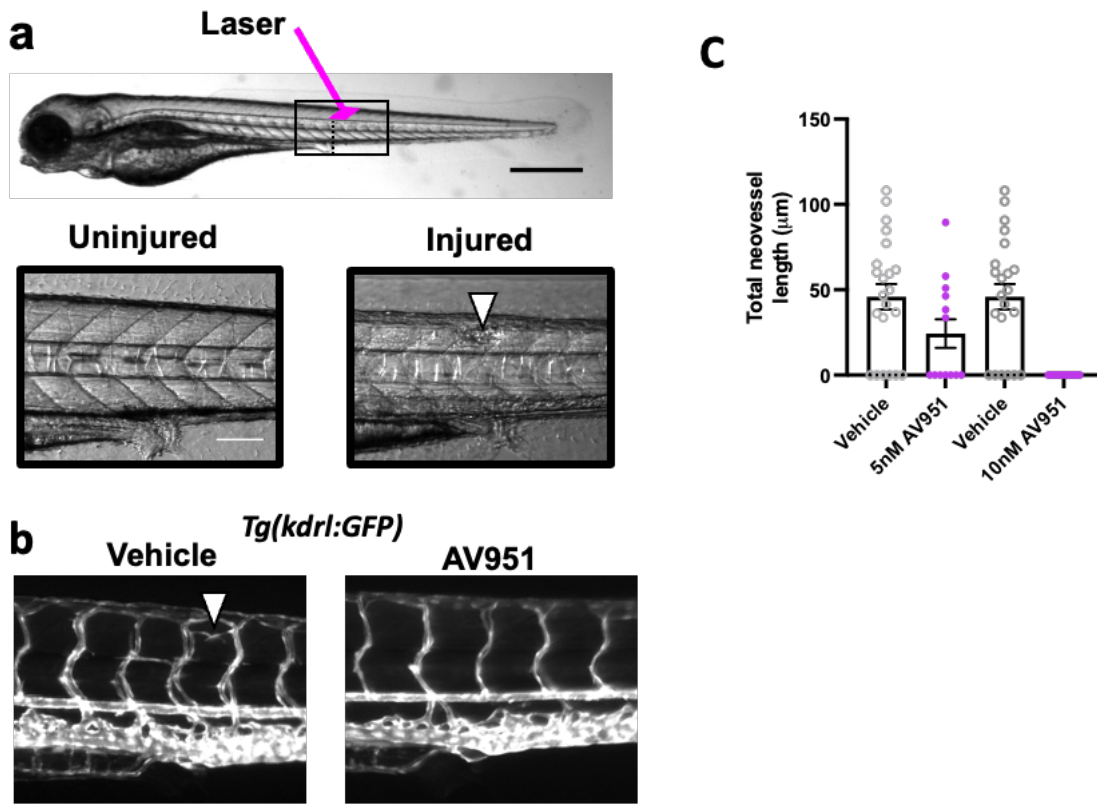

1763  
 1764  
 1765  
 1766  
 1767  
 1768  
 1769  
 1770  
 1771  
 1772  
 1773

**Supplementary figure 7: 10nM VEGFR pan antagonist AV951 entirely abolishes inflammatory angiogenesis.**

(a) Annotated brightfield image of a 3 dpf whole larva (0 hpi) with the somite used for laser injury highlighted in magenta, scale bar = 500µm .Black box = zoom panel for lower panels. Lower panels show the laser lesion site (white arrow), scale bar = 100µm. (b) Representative epifluorescence images of trunk vasculature surrounding the laser lesioned muscle segment/somite in vehicle and 10nM AV951 treated (0-48 hpi) larvae at 48 hpi. White arrow = neovasculature. (c) Quantification of

1774 neovasculature length at 48 hpi after laser injury for vehicle, 5 nM and 10nM AV951-  
 1775 treated larvae, n=13-22.  
 1776

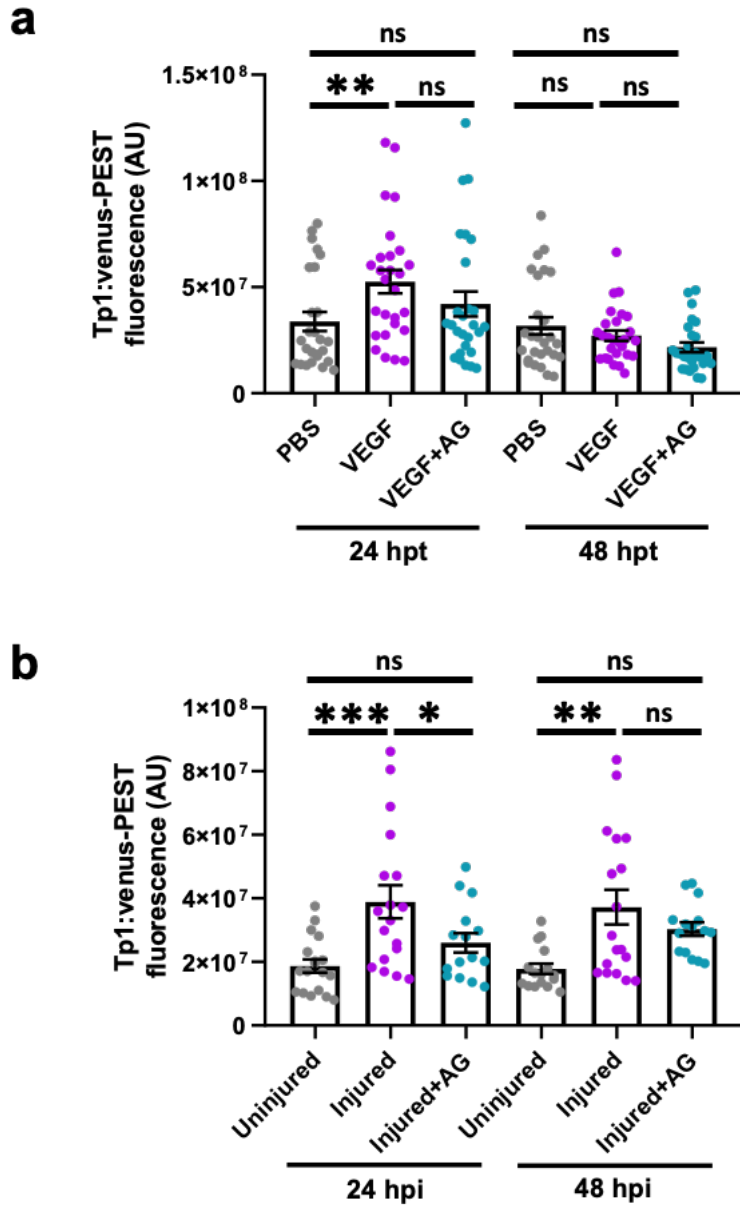

1777  
 1778 **Supplementary figure 8: VEGFaa injection and injury increase myocardial**  
 1779 **notch signaling in a Nrg-ERRB dependent manner.**  
 1780 (a) Quantification of total ventricular myocardial from *Tg(Tp1:venus-PEST)* hearts  
 1781 following injection with PBS or zfVEGFaa or injection with zfVEGFaa and incubation  
 1782 in pan ERRB antagonist AG1478, n=28 (b) Quantification of total ventricular  
 1783 myocardial from *Tg(Tp1:venus-PEST)* uninjured hearts and in hearts following laser  
 1784 injury or laser injury and in pan ERRB antagonist AG1478, n=18. \* $p \leq 0.05$ , \*\* $p \leq 0.01$ ,



1785 \*\*\* $p \leq 0.001$ , One way ANOVA followed by Holm-Sidak's multiple comparisons Post-  
 1786 hoc test.  
 1787

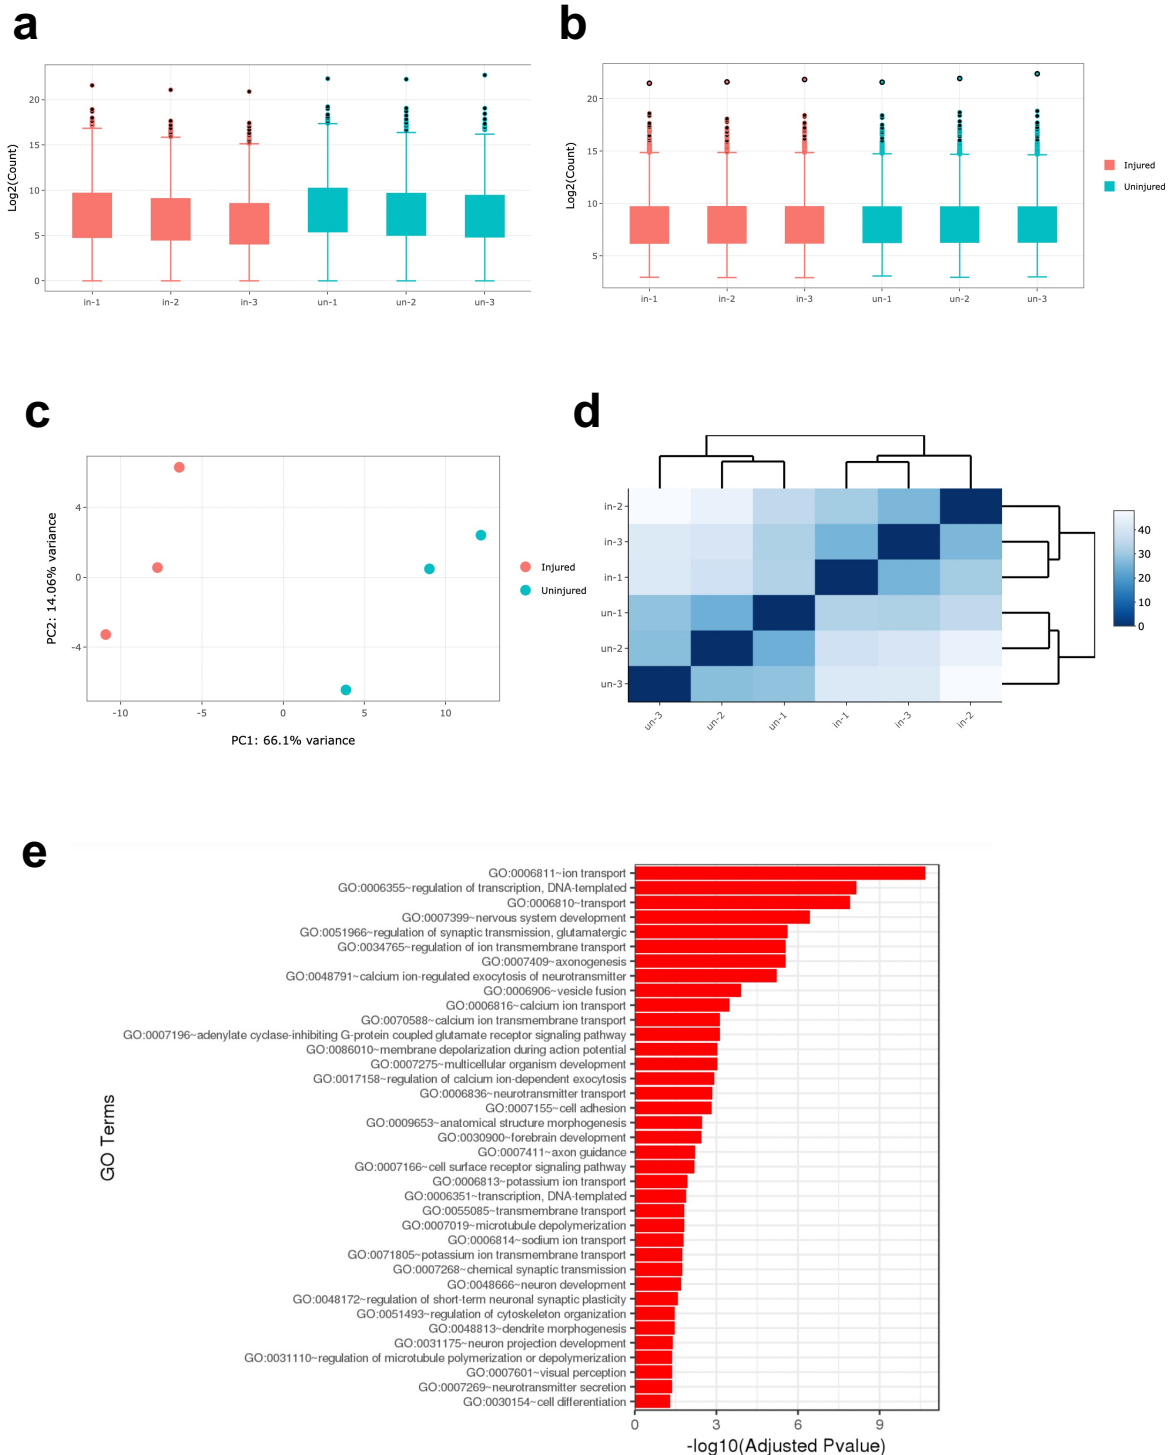

1788  
 1789 **Supplementary figure 9: Bulk RNAseq analysis of uninjured and injured larval**  
 1790 **hearts**

1791 (a) Box plot illustrating the distribution of reads before (a) and after normalisation (b).  
1792 (c) Principle component analysis of samples illustrating sample similarity. (d)  
1793 Distance matrix illustrating pairwise sample similarity. (e) Plot showing gene ontology  
1794 terms that were significantly enriched by Fishers exact test for significantly  
1795 ( $p_{adj} < 0.05$ ) differentially expressed genes between uninjured and injured hearts at  
1796 48. hpi.

1797

1798 **Videos:**

1799

1800 Videos 1-8 can be found deposited on Dropbox via the following link:

1801 <https://www.dropbox.com/s/h91m523wiab6kh0/Videos.zip?dl=0>

1802

1803 Video 1: LSFM-acquired heartbeat-synchronised timelapse of a  
1804 *Tg(csf1ra:mCherry;mpeg1:GFP)* heart showing macrophage heterogeneity following  
1805 cardiac injury.

1806 Video 2: LSFM-acquired heartbeat-synchronised timelapse of a  
1807 *Tg(mpeg1:mCherry;tnfa:GFP)* heart showing macrophage plasticity following cardiac  
1808 injury.

1809 Video 3: LSFM-acquired heartbeat-synchronised timelapse of a *Tg(myI7:h2b-*  
1810 *GFP;mpeg1:GFP)* heart injected with propidium iodide showing PI+ cardiomyocyte  
1811 expulsion following cardiac injury.

1812 Video 4: LSFM-acquired heartbeat-synchronised timelapse of a *Tg(myI7:h2b-*  
1813 *GFP;myI7:mKateCAAX)* heart following cardiac injury showing cardiomyocyte  
1814 apoptosis following injury.

1815 Video 5: LSFM-acquired heartbeat-synchronised timelapse of a  
1816 *Tg(myI7:GFP;mpeg1:mCherry)* heart, 3D surface rendered, showing removal and  
1817 internalization of myocardial debris by macrophages following injury.

1818 Video 6: LSFM-acquired heartbeat-synchronised timelapse of a *Tg(myI7:GFP)* heart,  
1819 3D surface rendered, showing budding and bridging of wound margin myocardium  
1820 following injury.

1821 Video 7: LSFM-acquired heartbeat-synchronised timelapse of a *Tg(myI7:h2b-*  
1822 *GFP;myI7:mKateCAAX)* heart, showing budding and bridging of individual wound-  
1823 margin cardiomyocytes following injury.

1824 Video 8: LSFM-acquired heartbeat-synchronised timelapse of a *Tg(myI7:h2b-*  
1825 *GFP;myI7:mKateCAAX)* heart, showing cardiomyocyte cell division with nuclear  
1826 division and cytokinesis.

1827

1828

1829

1830
