1           **Macrophages stimulate epicardial VEGF $\alpha$  expression to trigger**  
2           **cardiomyocyte proliferation in larval zebrafish heart regeneration**

3  
4   Finnius A. Bruton<sup>1\*</sup>, Aryan Kaveh<sup>1</sup>, Katherine M. Ross-Stewart<sup>1</sup>, Gianfranco Matrone<sup>1</sup>,  
5   Magdalena E.M. Oremek<sup>2</sup>, Emmanouil G. Solomonidis<sup>1</sup>, Carl S. Tucker<sup>1</sup>, John J.  
6   Mullins<sup>1</sup>, Mairi Brittan<sup>1</sup>, Jonathan M. Taylor<sup>3</sup>, Adriano G. Rossi<sup>2</sup>, Martin A. Denvir<sup>1</sup>.

7   <sup>1</sup>Centre for Cardiovascular Science, Queen's Medical Research Institute, University  
8   of Edinburgh, Edinburgh, United Kingdom.

9   <sup>2</sup>Centre for Inflammation Research, Queen's Medical Research Institute, University  
10   of Edinburgh, Edinburgh, United Kingdom.

11   <sup>3</sup>Department of Physics, University of Glasgow, Glasgow, United Kingdom.

12   Corresponding author: \*

13  
14   **Abstract**

15  
16   Cardiac injury induces a sustained macrophage response in both zebrafish and  
17   mammals. Macrophages perform a range of both beneficial and detrimental functions  
18   during mammalian cardiac repair, yet their precise roles in zebrafish cardiac  
19   regeneration are not fully understood. Here we characterise cardiac regeneration in  
20   the rapidly regenerating larval zebrafish laser injury model and use macrophage  
21   ablation and macrophage-null *irf8* mutants to define the role of macrophages in key  
22   stages of regeneration. Live heartbeat-synchronised imaging and RNA sequencing  
23   revealed an early proinflammatory phase, marked by *tnfa*<sup>+</sup> macrophages, which then  
24   resolved to an anti-inflammatory, profibrotic phase. Macrophages were required for  
25   cardiomyocyte proliferation but not for functional or structural recovery following injury.  
26   Importantly, we found that macrophages are specifically recruited to the epicardial-  
27   myocardial niche, triggering the expansion of the epicardium which upregulates  
28   VEGF $\alpha$  expression to induce cardiomyocyte proliferation. Hence, revealing a novel  
29   mechanism by which macrophages facilitate cardiac regeneration.

30  
31   **Introduction**

32

33 Zebrafish are highly regenerative, exhibiting the capacity to restore full structure and  
34 function to a wide range of tissues following injury<sup>1-5</sup>. Cardiac injury is one such  
35 example where adult mammals are only able to facilitate maladaptive repair but  
36 zebrafish exhibit full tissue regeneration<sup>6,7</sup>. In humans, the most severe form of cardiac  
37 injury is myocardial infarction (MI), where occlusion of a coronary artery triggers  
38 ischemic injury to the myocardium, leading to the loss of approximately 1 billion  
39 cardiomyocytes<sup>8</sup>. Adult mammalian cardiomyocytes are considered largely post-  
40 mitotic, switching to hypertrophic growth shortly after birth. They are therefore unable  
41 to restore lost myocardium, which is instead replaced with non-contractile scar tissue<sup>9</sup>.  
42 Consequently, MI patients suffer sequelae of maladaptive remodelling, leading to left  
43 ventricular dilation and thinning of the scar, further decreasing the function of the  
44 heart<sup>10,11</sup>. Hence, there is a need for medical innovation which can reverse or prevent  
45 this process.

46

47 In contrast to mammalian models of MI, apical resection and cryoinjury MI models in  
48 zebrafish show full regeneration of lost myocardium *via* the dedifferentiation and  
49 proliferation of surviving cardiomyocytes<sup>12,13</sup>. Cardiac regeneration is complex and  
50 dynamic, with zebrafish hearts undergoing debridement of dead myocardium, followed  
51 by transient fibrosis, revascularisation and eventual replacement of cardiomyocytes<sup>14</sup>.  
52 The inflammatory response has been demonstrated to be crucial for each of these key  
53 events, both in zebrafish and also in other regenerative species such as axolotls and  
54 neonatal mice<sup>15-17</sup>. In particular, macrophages have emerged as important cellular  
55 regulators of tissue regeneration. Indeed, macrophage ablation has been shown to  
56 abrogate regeneration across multiple organs and organisms, including the adult  
57 zebrafish heart<sup>15,16,18</sup>. However, the precise contribution of macrophages to cardiac  
58 repair has been complicated by disparate results following macrophage perturbation  
59 in mouse models of MI, where macrophages have been reported to be both beneficial  
60 and detrimental<sup>7,19,20</sup>. This is in part attributed to substantial heterogeneity of  
61 macrophage subtypes, and phenotypic plasticity<sup>21,22</sup>. Recent studies have confirmed  
62 the presence of macrophage subsets in zebrafish, yet their functional niche and  
63 interactions with other key cell types of the heart, such as the epicardium, remain  
64 poorly understood<sup>23,24</sup>. The larval zebrafish model of cardiac regeneration offers a  
65 tractable system to examine macrophages in detail. Larval zebrafish regenerate more

66 rapidly than adults, occurring in just 48 hours after cardiac laser injury in 3-day old  
67 larvae<sup>25,26</sup>. Combined with their amenability for live *in vivo* imaging and genetic  
68 tractability, this model becomes a powerful tool with which to carefully examine how  
69 macrophages support multiple aspects of cardiac regeneration.

70

71 Here we report an in-depth characterisation of the macrophage response and several  
72 key regenerative processes in larval zebrafish cardiac regeneration, finding the heart  
73 regeneration program between the larvae and adults to be highly conserved. Abolition  
74 of the macrophage response using metronidazole-nitroreductase ablation of  
75 macrophages or the macrophage null *irf8*<sup>-/-</sup> mutant<sup>27</sup>, demonstrated a requirement for  
76 these cells in removal of apoptotic cells, epicardial activation and cardiomyocyte  
77 proliferation. Interestingly, we found that one of the ways macrophages exert their pro-  
78 proliferative effect is via epicardial VEGF<sub>aa</sub> and downstream endocardial notch  
79 signalling. Our study reveals that macrophages invade the epicardial-myocardial  
80 niche, inducing expansion of epicardial cell numbers which increases epicardial  
81 VEGF<sub>aa</sub> expression, leading to an upregulation of endocardial notch signalling and  
82 the cardiac developmental growth pathway.

83

## 84 **Results**

85

### 86 **Macrophages display cellular heterogeneity following cardiac injury**

87

88 We first assessed macrophage heterogeneity and recruitment dynamics following  
89 larval cardiac injury. We crossed the zebrafish pan-macrophage reporter line  
90 *Tg(mpeg1:GFP)* with *Tg(csf1ra:gal4;UAS:mCherry-NfsB)* (shortened here to *csf1ra*:  
91 *mCherry*) (Supplementary Figure 1a). *Csf1ra* (colony stimulated factor 1 receptor) is a  
92 cytokine required for macrophage development and used as a macrophage reporter  
93 promoter in mammals<sup>28</sup>.

94

95 Larval hearts were lasered at the ventricular apex at 72 hours post-fertilisation (hpf)  
96 and imaged at 2, 6, 24, and 48 hours post injury (hpi) (Figure 1a). Macrophages  
97 migrate to the injured ventricular apex within 2 hours, peak at 6 and maintain elevated  
98 numbers until 48 hpi (Figures 1b & 1c). We found that not all recruited macrophages  
99 were co-positive for both transgenes, leading to three subsets 1) *mpeg1+csf1ra-*

100 (19.3±5.1%), 2) mpeg1-csf1ra<sup>+</sup> (2.8±2.1%) and 3) mpeg1+csf1ra<sup>+</sup> (77.9±5.7%).  
101 Similar dynamics were seen for subsets 1 & 3 but since mpeg1-csf1ra<sup>+</sup> were  
102 exceedingly rare it is not possible to know if the dynamics are likewise similar. Both  
103 subsets exhibit a range of morphologies with no overt difference between groups  
104 (Figure 1d, Video 1). Importantly, our data demonstrate that larval macrophages  
105 recruited to cardiac injury are heterogenous in their marker expression, similar to adult  
106 zebrafish<sup>29</sup>, and suggest a comparatively complex macrophage response in the larval  
107 model.

108

### 109 **Macrophages display cellular plasticity following cardiac injury**

110

111 To examine if macrophages display plasticity and convert to an inflammatory  
112 phenotype in the larval cardiac injury model, we performed cardiac laser injury on  
113 *Tg(tnfa:GFP;mpeg1:mCherry)* larvae. (Figure 1e & 1f). Quantification of tnfa<sup>+</sup>  
114 macrophage number revealed a transient tnfa<sup>+</sup> subset (19.3±4.9% of mpeg1+  
115 macrophages, n=24), found only at the 24 hpi timepoint and rarely in uninjured larvae  
116 (Figure 1f & Supplementary figure 1b). We also observed that from 24 hpi,  
117 macrophages retract their pseudopods and become spherical, further suggesting a  
118 shift in phenotype (Supplementary figure 1e).

119

120 We reasoned that if tnfa<sup>+</sup> macrophages were indeed inflammatory macrophages then  
121 application of M1-polarisation cytokine IFN- $\gamma$  would increase their abundance. A single  
122 intravenous injection of zebrafish recombinant protein IFN- $\gamma$ -rel, immediately prior to  
123 cardiac injury, increased the proportion of tnfa<sup>+</sup>mpeg1<sup>+</sup> macrophages from  
124 26.4±11.0% in PBS injected controls to 78.8±9.5%, supporting the suggestion that  
125 these were inflammatory macrophages (Figure 1g & Supplementary figure 1c & 1d).

126

127 Furthermore, *in vivo* imaging live in the beating heart showed recruited macrophages  
128 becoming tnfa:GFP<sup>+</sup> after arrival at the injured ventricle, confirming that this  
129 represents true *in situ* conversion (Figure 1h, Video 2). Taken together, these data  
130 show that, as in adults, macrophages display plasticity and become inflammatory in  
131 response to cardiac injury, confirming the complexity of the macrophage response in  
132 this model.

133

### 134 **Larval cardiac laser lesions are similar in structure to adult cryoinjury**

135

136 To validate analyses of macrophage function in the larval injury model, we first sought  
137 to determine if the laser lesion is comparable to adult cryoinjury and mammalian  
138 infarcts. Using the line *Tg(myl7:mKateCAAX;myl7:h2b-GFP)*, which labels  
139 cardiomyocyte sarcolemma and chromatin respectively, we observed that, following  
140 injury, a circlet of cardiomyocytes with pyknotic nuclei formed (Figure 2a). These  
141 pyknotic nuclei were TUNEL+ at 6 hpi, confirming apoptosis and they encircled the  
142 GFP- lesion (Figure 2b & 2c). Heartbeat-synchronised LSFM (lightsheet fluorescence  
143 microscopy)<sup>30</sup> showed that nuclear condensation occurred extremely rapidly, being  
144 identified by 1.5 hpi (Supplementary figure 2a, Video 3).

145

146 We hypothesised that the GFP- epicentre of the laser lesion may contain cells that  
147 immediately necrose upon injury. To test this, we labelled necrotic cells by injecting  
148 propidium iodide (PI) intravenously immediately following injury (<0.5 hpi). We found  
149 that there were indeed PI+ cells in the GFP- region, and PI+ debris scattered across  
150 the proximal myocardium from 1 hpi (Figure 2d). Time-lapse imaging of PI-injected,  
151 injured *Tg(mpeg1:GFP;myl7:h2b-GFP;myl7:mKateCAAX)* hearts showed that  
152 necrotic cells are rapidly cleared within the first 0-2 hpi (Supplementary figure 2b &  
153 Video 3). Necrotic cells either disintegrated or were squeezed out from the  
154 myocardium into the pericardial cavity, independently of macrophage contact (Video  
155 4). Overall, this characterisation confirms the structure of the laser lesion mirrors the  
156 necrotic infarct and apoptotic border zone observed in adult zebrafish cryoinjury and  
157 mammalian MI<sup>14,31</sup>.

158

### 159 **Macrophages contribute to the removal of apoptotic cardiomyocytes following** 160 **injury**

161

162 We next sought to understand what role macrophages play in the regeneration of the  
163 larval heart, which occurs within only 48 hours of the initial injury<sup>25,26</sup>. We used two  
164 different methods to induce macrophage-less hearts. Firstly we used the  
165 *Tg(csf1ra:gal4;UAS:mCherry-NfsB)* line (abbreviated hereafter to *csf1ra:NfsB-*  
166 *mCherry*) that expresses a nitroreductase enzyme NfsB in macrophages, which

167 induces cell-specific apoptosis when exposed to prodrug metronidazole<sup>32</sup>  
168 (Supplementary figure 3a-d). Macrophage ablation only occurs in larvae expressing  
169 the nitroreductase (NTR) *and* in the presence of metronidazole (NTR+met+).  
170 Therefore, larvae only expressing the nitroreductase (NTR+met-) or only in the  
171 presence of metronidazole (NTR-met+) are used as macrophage-replete control  
172 groups. The second method was the use of the macrophage-null *irf8*<sup>-/-</sup> mutant<sup>27</sup>, IRF8  
173 being a transcription factor required for macrophage development (Supplementary  
174 figure 3e-h).

175

176 To determine if macrophages are required for the removal of apoptotic cells, we  
177 performed TUNEL staining on *irf8*<sup>-/-</sup> and *irf8*<sup>+/+</sup> *Tg(myI7:h2b-GFP)* larvae at the  
178 standard 2, 6, 24, 48 hpi timepoints (Figure 2e & 2g). In injured *irf8*<sup>+/+</sup> hearts, the  
179 number of apoptotic cardiomyocytes significantly increased at 2 hpi and 6 hpi  
180 compared to uninjured controls (4.1±0.9 vs 0.0±0.0 and 5.3±1.0 vs 0.1±0.1  
181 respectively, n=15-29) but returned to baseline by 24 hpi. However, although injured  
182 macrophage-null *irf8*<sup>-/-</sup> hearts showed a similar initial pattern of cell death at 2 hpi and  
183 6 hpi (5.5±0.8 & 5.9±0.9 apoptotic cardiomyocytes respectively), apoptotic  
184 cardiomyocyte cells were still present at 24 hpi, only returning to uninjured levels by  
185 48 hpi.

186

187 In the macrophage ablation model, we saw a similar pattern of results where the  
188 numbers of apoptotic cells were negligible in uninjured hearts of all treatment groups,  
189 but peaked at 6 hpi following injury (NTR+met-, NTR-met+ & NTR+met+ =6.4±0.5,  
190 6.4±0.5 and 6.0±0.5, n=10-12) (Figure 2f & 2h). By 24 hpi the non-ablated groups no  
191 longer possessed significantly increased numbers of TUNEL+ myocardial cells;  
192 however, the macrophage-ablated group showed a retention of apoptotic cells at 24  
193 hpi (NTR+met+ = 1.5±0.3) that resolved by 48 hpi.

194

195 To verify that macrophages are directly removing myocardial debris, we performed  
196 time-lapse imaging of injured *Tg(myI7:GFP;mpeg1:mCherry)* larvae. We observed  
197 small GFP+ pieces of myocardial debris near the GFP- lesion being removed and  
198 internalised by macrophages (Figure 2i & Supplementary Figure 2c & Video 5),  
199 confirming the essential role of macrophages in lesion debridement.

200

201 **Macrophages are not obligatory for structural or functional recovery of the larval**  
202 **heart**

203

204 Next, we sought to investigate if macrophages are required for structural and  
205 functional recovery of the larval heart following laser-injury. We injured *Tg(myl7:GFP)*  
206 larvae following macrophage ablation and acquired serial 3D scans of the cardiac  
207 structure of individual larvae by heartbeat-synchronised LSM (Figure 3a). In all  
208 treatment groups, the lesion size was consistent between 2 hpi and 6 hpi, with no  
209 difference between groups. By 24 hpi the lesion had almost completely regressed  
210 (95% to  $37.1\mu\text{m}^2\pm 24.4$ , n=11-22) in macrophage-replete NTR+met- larvae (Figure 3b).  
211 However, for larvae in the macrophage-ablated NTR+met+ and the other  
212 macrophage-replete NTR-met+ group, lesion closure was slightly delayed at 24 hpi  
213 (73% and 75% to  $234.7\pm 59.7\mu\text{m}^2$  and  $221.4\pm 84.6\mu\text{m}^2$  respectively). By 48 hpi the  
214 lesions of larvae from each group had entirely regressed and luminal surface renders  
215 of injured ventricles showed normal trabecular structure (Figure 3a). These results  
216 suggest macrophages are not required for lesion closure, but that metronidazole-  
217 treatment slightly delays this process.

218

219 Using *Tg(myl7:GFP)* larvae, we acquired lateral-view videos of beating hearts with  
220 epifluorescence microscopy and tested if macrophage ablation affected recovery of  
221 cardiac function. Immediately following injury at 2 hpi, volumetric ejection fraction was  
222 decreased in all groups from 74% in uninjured ventricles to 54% in injured (Figure 3c  
223 & Supplementary figure 4a & 4b). Ejection fraction recovered quickly by 6 hpi in all  
224 treatment groups, (~78% injured vs ~87% uninjured) and by 24 hpi and 48 hpi injured  
225 hearts were functionally indistinguishable from uninjured hearts. These data suggest  
226 that injured larval hearts recover their function rapidly, and that this recovery is not  
227 macrophage dependent.

228

229 We next performed identical experiments examining the recovery of cardiac structure  
230 and function with *Tg(myl7:GFP)* larvae on an *irf8* mutant background. Both *irf8*<sup>+/+</sup> and  
231 *irf8*<sup>-/-</sup> genotype larvae showed substantial lesion regression (~80%) between 6 hpi and  
232 24 hpi ( $898.6\mu\text{m}^2\pm 189.7$  to  $211.6\mu\text{m}^2\pm 115.8$  vs  $1002.9\mu\text{m}^2\pm 158.4$  to  $113.89$

233  $\mu\text{m}^2 \pm 59.5$ , respectively) (Figure 3d & 3e). No difference in lesion size was seen at any  
234 timepoint and both genotypes had completely closed their lesions by 48 hpi. Normal  
235 trabecular structure was seen in both groups at 48 hpi following full structural recovery  
236 (Figure 3d). The recovery of ejection fraction in this model followed the same trend as  
237 that of the metronidazole-nitroreductase model, with the ejection fraction of injured  
238 larvae being indistinguishable from uninjured larvae by 24 hpi in both genotypes  
239 (Figure 3f). Our near identical findings in the *irf8* macrophage null model confirm that  
240 larval hearts rapidly recover following laser injury and that this process is macrophage  
241 independent.

242

243 Finally, we wished to understand the mechanism of lesion closure. We performed  
244 heartbeat-synchronised time-lapse imaging of lesions in *Tg(myI7:GFP)* larvae  
245 immediately following injury. We observed GFP+ myocardial budding on opposite  
246 sides of the lesion border zone and subsequent invasion into the lesion, adhering to  
247 each other to form bridges (Figure 3g, Video 6). Repeating this experiment in  
248 *Tg(myI7:h2b-GFP;myI7:mKateCAAX)* larvae facilitated the tracking of individual  
249 cardiomyocytes by virtue of their labelled nuclei and plasma membranes (Video 7 &  
250 Supplementary figure 2d). We found that cardiomyocytes bordering the lesion did not  
251 divide but extended protrusions into the lesion until they adhered with other single  
252 cardiomyocytes bridging from the opposing side of the lesion. These imaging insights  
253 suggest that myocardial structure is first restored by morphogenesis rather than cell  
254 division.

255

### 256 **Macrophage ablation abolishes an injury-associated increase in cardiomyocyte** 257 **proliferation**

258

259 To test if cardiomyocyte proliferation increases in response to laser-injury, we  
260 performed EdU staining in *Tg(myI7:h2b-GFP)* larvae in two experiments. In the first  
261 experiment, uninjured and injured larvae were exposed to EdU during 0-24 hpi and  
262 then at 24-48 hpi for the second (Figure 4a). Comparison between uninjured and  
263 injured hearts revealed no significant difference in the proportion of EdU+  
264 cardiomyocyte nuclei 0-24 hpi ( $21.3 \pm 3.3$  vs  $18.9 \pm 3.4$  respectively,  $n=10-14$ ) (Figure  
265 4b & 4c). However, over 24-48 hpi there was an organ-wide, 35% increase in the



266 proportion of EdU+ cardiomyocytes in injured hearts relative to uninjured ( $43.5\pm 1.8\%$   
267 vs  $32.2\pm 2.0\%$  respectively,  $n=17-25$ ). Time-lapse *in vivo* imaging of dividing  
268 cardiomyocytes showed nuclear division followed by cytokinesis, exclusively gives rise  
269 to mononuclear cells, with no obvious hypertrophy (Video 8, Supplementary Figure  
270 5a).

271

272 To understand if macrophages are required for the injury-dependent increase in  
273 cardiomyocyte proliferation, EdU was pulsed during the proliferative 24-48 hpi window  
274 in the macrophage-less models (Figure 4d). In the metronidazole-nitroreductase  
275 ablation model we found that the percentage of EdU+ cardiomyocytes increased in  
276 injured hearts in both the NTR+met- and NTR-met+ control groups, but not in the  
277 macrophage-ablated NTR+met+ group (Figure 4e & 4f). This result indicates that  
278 macrophages are a requirement for injury-dependent increase in cardiomyocyte  
279 proliferation. However, in contrast to the metronidazole-nitroreductase ablation model,  
280 analysis of cardiomyocyte proliferation in *irf8*<sup>-/-</sup> mutants revealed that they too  
281 significantly increased the percentage of EdU+ cardiomyocytes following injury,  
282 comparably to *irf8*<sup>+/+</sup> larvae (Figure 4g & 4h).

283

284 To resolve this disparity, we examined more closely the differences between these  
285 models. We found, like others<sup>18</sup>, that *irf8*<sup>-/-</sup> mutants possess a greater global number  
286 of neutrophils than observed in *irf8*<sup>+/+</sup> fish and mount a larger neutrophil response to  
287 injury (Supplementary Figure 5b & 5c). Since we do not observe an increased  
288 neutrophil response in NTR+met+ larvae, we hypothesised that neutrophils might be  
289 compensating for macrophages in *irf8*<sup>-/-</sup> larvae (Supplementary Figure 5d). To test this  
290 hypothesis, we inhibited neutrophil recruitment in *irf8*<sup>-/-</sup> larvae using the receptor  
291 antagonist 'SB225002' which blocks CXCR1/2 activation, a key chemokine receptor  
292 for neutrophil migration. CXCR1/2 inhibition successfully lowered the number of  
293 recruited neutrophils ( $2.0\pm 3.4$  vs  $0.43\pm 0.18$ ) and abolished the injury-associated  
294 increase in cardiomyocytes in *irf8*<sup>-/-</sup> (Supplementary Figure 5e-g). Taken together, this  
295 suggests that macrophages are required for cardiomyocyte proliferation but can be  
296 substituted by excess neutrophils.

297

298 **Regenerating larval hearts resolve inflammation and enter a reparative stage by**  
299 **48 hpi**

300

301 Next, we sought to understand which biological processes might still be occurring by  
302 the final 48 hpi timepoint of the larval cardiac injury model. We performed RNAseq on  
303 pooled, uninjured and injured larval hearts at 48 hpi (Figure 5a). We found 418 genes  
304 were upregulated ( $\log_2$  fold change  $>1$ ), and 1,046 downregulated in injured hearts.  
305 We did not observe differential expression of markers of proliferation such as MCM2,  
306 mKi67 and PCNA, suggesting that the proliferation we observe from 24 hpi is  
307 concluded by 48 hpi (Figure 5b). In agreement with this, gene ontology analysis  
308 indicated categories such as growth factors and cell proliferation not to be enriched at  
309 48 hpi (Supplementary Figure 6e).

310

311 Most inflammatory and M1 markers were either not differentially expressed or were  
312 downregulated in injured hearts, such as *Il1b* (Figure 5b & Supplementary file 1). In  
313 contrast, we found injury-associated upregulation of 39 collagen isoforms, several  
314 profibrotic genes such as *tgfb1a* and markers of epithelial to mesenchymal transition  
315 (EMT) such as *vimentin*. Similarly, hierarchical clustering of differentially expressed  
316 genes revealed 9 distinct clusters with Cluster 1 being upregulated in injured hearts  
317 and enriched in collagens, matrix metalloproteins (MMPs) and fibroblast growth factors  
318 (FGFs) (Figure 5c, Supplementary file 2). Additionally, Cluster 2 contained several  
319 EMT genes, Cluster 8 genes relating to cell recruitment and lymphangiogenesis whilst  
320 Cluster 7 contained several embryonic-associated myosins and myosin binding  
321 proteins such as *myl10* and *cald1b*. Clusters 3-6 & 9 were downregulated in injury,  
322 Cluster 2 was enriched for immune genes and Clusters 4 and 6 for growth factors, with  
323 Clusters 3 and 5 having no clear identity. Taken together, our RNAseq results suggest  
324 that the inflammatory and proliferative stages are largely concluded by 48 hpi and that  
325 a pro-resolving and reparative phase dominates thereafter.

326

327 **Cardiac injury induces epicardial activation and VEGF $\alpha$  upregulation**

328

329 Our detailed characterisation of the larval laser injury model revealed a macrophage-  
330 dependent, cardiomyocyte proliferative response occurring at 24-48 hpi. We therefore  
331 utilised the rapidity and imaging opportunities offered by the model to investigate the

332 underlying mechanism of the induction of cardiomyocyte proliferation. Epicardial  
333 VEGFaa has recently been demonstrated to drive cell cardiomyocyte proliferation in  
334 adult zebrafish following cryoinjury and we hypothesised the same mechanism might  
335 drive cardiomyocyte proliferation in the injured larval heart<sup>33</sup>.

336

337 We found robust *vegfaa:GFP* expression specifically in mesothelial cells overlying the  
338 myocardium (Figure 6a). Colocalisation with established epicardial marker *tcf21* in  
339 uninjured *Tg(tcf21:DsRed;vegfaa:GFP)* larvae confirmed these cells to be early  
340 epicardium (Figure 6b). Next we investigated if epicardial *vegfaa:GFP* expression  
341 changes following injury by 3D fluorescence intensity analysis of uninjured and  
342 regenerating hearts. We found that epicardial *vegfaa:GFP* intensity increased  
343 significantly at 48 hpi (Figure 6c & 6d). Interestingly, this was due both to an increase  
344 in the number of epicardial cells and their individual intensity suggesting the  
345 epicardium activates and responds to injury by both proliferation and gene expression  
346 changes to increase VEGFaa (Supplementary figure 7c & 7d).

347

### 348 **Macrophages localise to the epicardial niche and induce the expansion of** 349 **epicardial cell number**

350

351 Given that our data showed that macrophage ablation abolishes injury-dependent  
352 cardiomyocyte proliferation (Figure 5f), we hypothesised that macrophages might be  
353 required for epicardial activation. To test this hypothesis, we ablated macrophages  
354 and assessed if epicardial activation still occurred at 48 hpi. Following injury we  
355 observed increased *vegfaa:GFP* expression in both macrophage-replete NTR-met+  
356 and NTR+met- groups, but not in macrophage ablated NTR+met+ hearts (Figure 6f &  
357 6g). Interestingly, macrophage ablation did not affect *vegfaa:GFP* expression per cell,  
358 but did block the expansion of epicardial cell number following injury (Figure 6h &  
359 Supplementary Figure 7e). Furthermore, 3D analysis of macrophage localisation  
360 following injury showed that recruited macrophages invade the myocardial-epicardial  
361 niche and synapse with epicardial cells (Figure 6e). Importantly, macrophage or  
362 neutrophil *vegfaa:GFP* expression was not observed at any timepoint (Supplementary  
363 Figure 7a & 7b). Our data therefore strongly suggest that the recruitment of  
364 macrophages to the epicardium is essential for subsequent epicardial activation, thus  
365 increasing net cardiac *vegfaa* expression.

366

367 **VEGF<sub>Faa</sub> is both required and sufficient for cardiomyocyte proliferation in larval**  
368 **zebrafish**

369

370 To verify if epicardial VEGF<sub>Faa</sub> was driving cardiomyocyte proliferation in larval cardiac  
371 regeneration, we first tested if VEGF<sub>Faa</sub> was sufficient to stimulate cardiomyocyte  
372 proliferation. Recombinant zebrafish VEGF<sub>Faa</sub> protein (zfVEGF<sub>Faa</sub>) was intravenously  
373 microinjected into the circulation of 72 hpf *Tg(myf7:h2b-GFP)* larvae and total  
374 cardiomyocyte number assessed at 24 and 48 hpt (hours post-treatment) (Figure 7a).  
375 zfVEGF<sub>Faa</sub> increased total cardiomyocyte number by 13.3% relative to PBS-injected  
376 controls at 24 hpt (Figure 7b & 7c).

377

378 To test if VEGF signalling is required for injury-associated cardiomyocyte proliferation,  
379 we used a high-affinity, pan-VEGFR receptor antagonist AV951 (Tivozanib) to block  
380 VEGF signalling<sup>34</sup>. We bathed larvae in 10nM AV951 over the course of our cardiac  
381 injury model, pulsed with EdU at 24-48 hpi and quantified EdU+ cardiomyocytes at 48  
382 hpi (Figure 7d). Interestingly, AV951 decreased the proportion of EdU+  
383 cardiomyocytes in both the uninjured and injured groups (uninjured 38.4±3.4 vs  
384 28.0±3.0 and injured 42.9±3.8 vs 31.6±2.2, n=13-36) (Figure 7e & 7f). Together, these  
385 data suggest that VEGF signalling in the heart is driving cardiomyocyte proliferation in  
386 the larval heart, both as part of normal development and following cardiac injury.

387

388 **Notch and Nrg-ErbB signalling are required for cardiomyocyte proliferation**

389

390 We next investigated if macrophage-induced epicardial VEGF<sub>Faa</sub> signalling could be  
391 interacting with more established effectors of cardiomyocyte proliferation. Notch and  
392 Nrg-ErbB were strong candidates as both are required for adult heart regeneration  
393 and cardiomyocyte proliferation in adult zebrafish<sup>35-38</sup>. We first verified if these  
394 signalling pathways were required for cardiomyocyte proliferation in the larval heart  
395 following injury. We laser-injured *Tg(myf7:nlsDsRed)* larvae, and bathed them in  
396 100µM of pan-notch inhibitor DAPT ((N-[N-(3,5-difluorophenacetyl)-l-alanyl]-S-  
397 phenylglycine t-butyl ester) (Figure 7g). DAPT is a gamma secretase inhibitor and has  
398 been demonstrated in both zebrafish and drosophila to phenocopy notch mutants<sup>39-</sup>

399 41. Notch signalling inhibition decreased cardiomyocyte number by ~8% in uninjured  
400 hearts ( $253.3 \pm 5.2$  vs  $233.4 \pm 4.5$ ,  $n=25-38$ ) and ~14% injured hearts ( $266.0 \pm 5.6$  vs  
401  $229.5 \pm 3.6$ ,  $n=25-38$ ). (Figure 7h & 7i).

402

403 We repeated this experiment, with  $1.75 \mu\text{M}$  ErbB2 antagonist AG1478 (Figure 7g).  
404 Small molecule inhibitor AG1478 selectively inhibits ErbB2, a required co-receptor for  
405 ErbB4 dimerization and subsequent neuregulin signal transduction and faithfully  
406 phenocopies *erbb2* mutants<sup>42</sup>. Interestingly, the results exactly replicated those of the  
407 notch signalling inhibition experiment, decreasing cardiomyocyte number by ~9% in  
408 uninjured ( $257.2 \pm 5.8$  vs  $235.2 \pm 4.2$ ) and by ~13% in injured hearts ( $265.7 \pm 5.5$  vs  
409  $229.5 \pm 5.9$ ) (Figure 7j & 7k). These results confirm that both notch signalling and Nrg-  
410 ErbB signalling are required for the expansion of cardiomyocyte number in both  
411 uninjured and injured larval hearts.

412

### 413 **Cardiac injury and VEGF<sub>aa</sub> induce endocardial notch signalling**

414

415 Given the individual requirement of VEGF, notch and Nrg-ErbB signalling for  
416 cardiomyocyte proliferation in the larval heart, we sought to understand if these  
417 signalling components might act in one pathway. Previous studies have demonstrated  
418 developmental larval zebrafish heart growth to be activated by cardiac contraction, via  
419 endocardial-notch>Nrg-ErbB signalling<sup>43,44</sup>. We hypothesised that VEGF<sub>aa</sub> might be  
420 driving cardiomyocyte proliferation by increasing endocardial notch signalling and  
421 consequently augmenting this developmental pathway (Figure 8a).

422

423 To test if VEGF<sub>aa</sub> could activate endocardial notch signalling, we utilised the notch  
424 signalling reporter line *Tg(Tp1:venus-PEST)* as a readout of cardiac notch signalling.  
425 Recombinant zfVEGF<sub>aa</sub> injected into 3 dpf larvae, and their hearts were analysed *via*  
426 heart-synchronised light-sheet microscopy at 6, 24 and 48 hpt (Figure 8b).  
427 Furthermore, an additional group of larvae were injected with zfVEGF<sub>aa</sub> but also  
428 bathed in ErbB2 antagonist AG1478. According to our hypothesised pathway (Figure  
429 8a), we reasoned that zfVEGF<sub>aa</sub> injection should upregulate notch signalling but that  
430 inhibition of Nrg-ErbB signalling should be unable to suppress zfVEGF<sub>aa</sub>-induced  
431 notch upregulation.

432

433 Notch signalling was primarily in the endocardium, colocalising with endothelial  
434 reporter *kdrl:mCherry* but was relatively low intensity and only detectable in a subset  
435 of larvae at any given timepoint (Figure 8c). We found, zfVEGFaa injection increased  
436 the percentage of larvae with notch+ (Tp1:Venus+) endocardium (46.4% to 78.6%,  
437 n=28) at 6 hpi but not at the 24 and 48 hpi timepoints (Figure 8d). Furthermore,  
438 AG1478 failed to block the increase in the percentage of notch+ hearts following  
439 zfVEGFaa injection, confirming Nrg-ErbB signalling was not upstream of *vegfaa* or  
440 notch signalling. In fact, zfVEGFaa+AG1478 treated larvae had a substantially higher  
441 percentage of notch+ hearts at 48 hpi than those treated with zfVEGFaa alone (25.0%  
442 vs 0%). This is suggestive of a negative feedback mechanism, supporting previous  
443 findings of Nrg-ErbB being downstream of notch signalling<sup>43</sup>.

444

445 To test if this pathway (Figure 8a) acted similarly in injury, we substituted zfVEGFaa  
446 injection for cardiac injury and repeated the experiment (Figure 8e). Cardiac injury  
447 similarly increased the percentage of hearts possessing notch+ endocardium but this  
448 occurred later, at 48 hpi (50.0% vs 11.1%, n=18) (Figure 8f & 8g). As before, AG1478  
449 did not block notch signalling, rather it seemed to enhance it. Whilst the percentage of  
450 notch+ hearts in the injured group did not significantly increase by 24 hpi,  
451 injured+AG1478 treated larvae did significantly increase relative to uninjured larvae  
452 (52.9% vs 11.1%).

453

454 Taken together, these results demonstrate that cardiac injury and VEGFaa increase  
455 endocardial notch signalling, providing a novel mechanism whereby macrophages can  
456 trigger cardiomyocyte proliferation via stimulation of epicardial *vegfaa* expression.

457

## 458 **Discussion**

459

460 In this study we have presented the first detailed characterisation of the larval  
461 zebrafish model of heart regeneration, demonstrating the heterogeneity and plasticity  
462 of macrophages in cardiac injury and testing the requirement of macrophages for the  
463 removal of apoptotic cells, cardiomyocyte proliferation, epicardial activation and  
464 recovery of cardiac structure and function. Furthermore, we demonstrated the utility of  
465 the larval cardiac injury model by taking advantage of its *in vivo* cardiac imaging

466 opportunities and amenability to pharmacological intervention to discover a novel role  
467 for macrophages in driving cardiomyocyte proliferation via epicardial activation.

468

469 Our examination of macrophages in larval zebrafish cardiac injury suggests that they  
470 may faithfully recapitulate the phenotypic complexity and function found in the adult  
471 cryoinjury model. As previously shown in adult hearts<sup>29</sup>, we detected *mpeg1+csf1ra+*  
472 and *mpeg1+csf1ra-* macrophage subsets. We found these cells to have identical  
473 recruitment dynamics and no obvious differences in morphology or behaviour. Recent  
474 Cre-Lox lineage tracing has shown that *mpeg1+csf1ra-* cells have a non-  
475 haematopoietic origin, are *csf1ra*-independent developmentally and, unlike  
476 *mpeg1+csf1ra+* cells, are not phagocytic<sup>45,46</sup>. Future work should focus on  
477 understanding the precise roles of these subsets in cardiac regeneration, in particular  
478 *mpeg1+csf1ra-* macrophages.

479

480 In addition to macrophage heterogeneity, we observed macrophage phenotypic  
481 plasticity. We used heartbeat-synchronised live imaging to show that macrophages  
482 can convert from *mpeg1+tnfa-* to *mpeg1+tnfa+*. This is the first time that macrophage  
483 phenotype conversion has been imaged in the heart. Studies examining zebrafish  
484 macrophages in spinal cord and tail transection have demonstrated *tnfa* to mark M1-  
485 like macrophages, which then transition to M2-like macrophages<sup>24</sup>. Our success in  
486 increasing the percentage of *tnfa+* macrophages by canonical M1-polarising cytokine  
487 IFN- $\gamma$ -rel suggests that early *tnfa+* macrophages are indeed proinflammatory. In  
488 agreement with findings in the in the adult cryoinjured heart<sup>29</sup>, we found this *tnfa+*  
489 population of macrophages to be transient, only observed in the early response at 24  
490 hpi. Similarly, our RNAseq data showed that, by 48 hpi, injured larval hearts  
491 downregulate inflammatory cytokines and growth factors but upregulate collagens and  
492 reparative cytokines. Our finding that a pro-resolving, fibrotic program is activated in  
493 injured hearts, despite full structural and functional recovery, is in agreement with a  
494 recent study showing the scar-deficient *runx1<sup>-/-</sup>* zebrafish to undergo successful  
495 cardiac regeneration<sup>47</sup>. It might be that the fibrotic program is concomitantly activated  
496 upon resolution of inflammation, irrespective of a requirement for scar tissue.

497

498 We used two separate methods to examine the role of macrophages in larval heart  
499 regeneration. Interestingly, ablation via *csf1ra*-driven nitroreductase expression was

500 still able to abolish numbers of csf1ra- macrophages at the injured heart. Possibly this  
501 is indicative of a positive-feedback system where csf1ra- macrophage recruitment is  
502 dependent on csf1ra+ macrophages. Cell death data acquired by either technique  
503 demonstrated that macrophages are required for the timely removal of apoptotic cells  
504 following injury. Interestingly, these apoptotic cells do eventually seem to be cleared  
505 even in the absence of macrophages. Our live imaging showed that dead  
506 cardiomyocytes can be expelled from the myocardium independently of macrophages.  
507 It is possible that this is a mechanical consequence of cardiac contraction, although a  
508 similar phenomenon is known to occur in neuroepithelium where neurons appear to  
509 extrude apoptotic cells out of tissue<sup>48</sup>.

510

511 Surprisingly, we found that the absence of macrophages did not affect the structural  
512 or functional recovery of the injured larval heart, despite macrophages being required  
513 for cardiomyocyte proliferation. This is in contrast to past studies where liposomal  
514 clodronate macrophage ablation and CCR2-antagonist inhibition of macrophage  
515 recruitment in regenerative neonatal mice, adult zebrafish and axolotl hearts causes  
516 blocked or delayed resolution of the infarct area<sup>15,16,49</sup>. The contrasting results in the  
517 larval heart might simply be a consequence of its small size and low transmural  
518 pressure, allowing surviving myocardium to rapidly ‘knit’ back together. Supporting  
519 this, we observed individual cardiomyocytes extending protrusions into the lesion.  
520 Previous histological analysis of the border zone in injured adult zebrafish and  
521 neonatal mouse hearts has shown cardiomyocytes exhibiting a similar mesenchymal  
522 phenotype following partial dedifferentiation and disassembly of sarcomeres<sup>50,51</sup>.  
523 However, this is the first time this behaviour has been verified by time-lapse imaging  
524 live in a beating heart.

525

526 Studies in adult zebrafish and neonatal mice have shown ablation of macrophages to  
527 decrease cardiomyocyte proliferation<sup>15,17</sup>. However, early revascularisation is critical  
528 for cardiomyocyte proliferation and is macrophage-dependent, calling into question  
529 whether macrophages directly induce cardiomyocyte proliferation<sup>17,52</sup>. Larval hearts  
530 do not have supporting vasculature<sup>26</sup>; therefore our finding that cardiomyocyte  
531 proliferation is macrophage-dependent suggests macrophages facilitate  
532 cardiomyocyte proliferation by means other than revascularisation. Indeed, our data  
533 indicate a novel mechanism whereby macrophages are recruited to the epicardial-



534 myocardial niche and induce expansion of epicardial cell numbers and increase in the  
535 expression of mitogenic VEGFaa. This might explain previous findings in developing  
536 and injured mouse hearts where yolk-derived and Gata6<sup>+</sup> pericardial cavity  
537 macrophages are recruited to the epicardium, respectively<sup>53,54</sup> Future studies should  
538 seek to identify precisely how macrophages activate epicardium. Given we found that  
539 neutrophils can compensate for macrophages for cardiomyocyte proliferation, it is  
540 possible that a shared inflammatory factor triggers epicardial activation.

541

542 Endocardial notch signalling is required for cardiomyocyte proliferation in cryoinjured  
543 adults and myocardial growth by downstream Nrg1 in larvae<sup>43,55,56</sup>. Therefore, our  
544 finding that injury and VEGFaa increase endocardial notch signalling reveals an  
545 important mechanism whereby the epicardium can induce cardiomyocyte proliferation.  
546 In agreement with previous studies, we showed both notch and Nrg-ErbB signalling to  
547 be required for expansion of cardiomyocyte numbers in both uninjured and injured  
548 hearts<sup>57-59</sup>. Since we found VEGFaa inhibition decreased cardiomyocyte proliferation  
549 in uninjured larval hearts, it is likely that VEGFaa>notch>Nrg-ErbB is a developmental  
550 cardiac growth pathway that is upregulated upon injury and thus might be conserved  
551 in mammals. Our discovery that macrophages act upstream of this pathway therefore  
552 opens up exciting immunomodulatory opportunities for therapeutic enhancement of  
553 cardiac repair in the future.

554

## 555 **Materials and Methods**

556

### 557 **Zebrafish husbandry and lines used**

558

559 Zebrafish husbandry and maintenance was conducted as per standard operating  
560 procedures, in accordance with the Animals (Scientific Procedures) Act, 1986 and  
561 approved by The University of Edinburgh Animal Welfare and Ethical Review Board in  
562 a United Kingdom Home Office-approved establishment. All our experiments were  
563 performed on staged zebrafish aged between 3 dpf and 5 dpf. The following transgenic  
564 and mutant lines were used: *Tg(myl7:eGFP)<sup>twu26</sup>*<sup>60</sup>, *Tg(mpx:mCherry)<sup>uwm7</sup>*<sup>61</sup>,  
565 *Tg(mpeg1:mCherry)<sup>gl23</sup>*<sup>62</sup>, *Tg(mpeg1:eGFP)<sup>gl22</sup>*<sup>62</sup>, *(Tg(mpx:GFP)<sup>i114</sup>)*<sup>63</sup>, *Tg(myl7:h2b-*  
566 *GFP)<sup>zf52</sup>*<sup>64</sup>, *Tg(myl7:mKateCAAX)<sup>SD11</sup>*<sup>65</sup>, *Tg(fms:Gal4.VP16)<sup>i186</sup>*, referred to as  
567 *csfr1a:gal4*<sup>66</sup>, *Tg(UAS-E1b:NfsB-mCherry)<sup>c264</sup>* abbreviated to UAS:NfsB-mCherry<sup>67</sup>,

568 *Tg(vegfaa:eGFP)<sup>PD260 33</sup>*, *Tg(myf7:nlsDsRed)<sup>f2 68</sup>* *Tg(TNFa:eGFP)<sup>sa43296 24</sup>*,  
569 *Tg(Tp1:venus-PEST)<sup>S940 69</sup>*, *Tg(kdrl:hsa.HRAS-mCherry)<sup>S896 70</sup>*, *Tg(kdrl:GFP)<sup>la116 71</sup>*,  
570 *Tg(tcf21:DsRed)<sup>PD37 72</sup>*, *Tg(myf7:gal4:myf7:GFP)<sup>cbg2Tg 73</sup>* and *irf8<sup>st95/st95 27</sup>* referred to as  
571 *irf8<sup>-/-</sup>*. *Tg(csf1ra:gal4:UAS:NfsB-mCherry)* is abbreviated to *csf1ra:NfsB-mCherry*  
572 throughout the manuscript for simplicity. Adults were day-crossed as appropriate to  
573 yield desired combinations of transgenes in embryos. Embryos were treated with  
574 0.003% phenylthiourea (Fisher Scientific) at 7 hpf to prevent pigment formation and  
575 therefore enhance image clarity. Embryos and larvae were incubated at 28.5°C in  
576 conditioned media/water (6.4 mM KCl, 0.22 mM NaCl, 0.33 mM CaCl<sub>2</sub>·2H<sub>2</sub>O, 0.33 mM  
577 MgSO<sub>4</sub>·7H<sub>2</sub>O) + 0.1% methylene blue (w/v) and imaged at room temperature (23°C)  
578 using epifluorescence or light sheet fluorescence microscopy (details below). When  
579 necessary, larvae were anesthetized using 40 µg/ml tricaine methanesulfonate (Sigma  
580 Aldrich) in conditioned media.

581

## 582 **Cardiac laser injury**

583

584 A Zeiss Photo Activated Laser Microdissection (PALM) laser system (Zeiss) was used  
585 to precisely cause a localised injury at the ventricular apex of anesthetized 72 hpf  
586 larvae<sup>26</sup>. Larvae were mounted on a glass slide in 20 µl anesthetized conditioned  
587 media and lasered via a 20X objective. Injuries were deemed successful and complete  
588 once ventricular contractility decreased, the apex had shrunk, and the myocardial wall  
589 had swollen without causing cardiac rupture and subsequent bleeding. A successful  
590 cardiac injury results in the portion of dysfunctional tissue losing fluorescent  
591 myocardial transgenic fluorescence signal. Uninjured larvae were treated in the same  
592 manner up to the point of laser injury, when they were individually transferred into  
593 single wells of a 24-well plate and maintained in the same environmental conditions  
594 as injured fish.

595

## 596 **Epifluorescence microscopy**

597

598 Larvae were mounted laterally in conditioned media on a glass slide and imaged using  
599 a Leica M205 FA stereomicroscope with GFP and mCherry filters. For all serial  
600 timepoint epifluorescence imaging experiments, number of immune cells on the heart

601 were quantified by manually observing and counting cells moving synchronously with  
602 the beating heart. Heart images were acquired using 2X 0.35NA objective.

603

#### 604 **Heart-synchronised light-sheet microscopy**

605

606 Individual larvae were prepared for light sheet fluorescence microscopy (LSFM) by  
607 embedding in 1% low melting-point agarose (ThermoFisher) in anesthetized  
608 conditioned media inside FEP tubes (Adtech Polymer Engineering). Agar embedding  
609 prevents gradual drift of the embryo in the FEP tube, without causing developmental  
610 perturbations during long-term imaging. Larvae were used only once for a time-lapse  
611 imaging experiment, and any repeats shown come from distinct individuals. Larvae  
612 were mounted head down such that the heart faces toward both illumination and  
613 imaging objectives to improve image clarity. All LSFM experiments were performed at  
614 room temperature (23°C). Camera exposure times ranged from 5-15 ms, laser  
615 excitation power was 11mW and scans were performed at 3-5 minute intervals.  
616 Brightfield images acquired at 80 fps were analysed in real-time to enable optically-  
617 gated acquisition of fluorescence z slices at a set phase of cardiac contraction, usually  
618 mid diastole. The setup of our custom-built LSFM system has been previously reported  
619 in detail<sup>30</sup>.

620

#### 621 **Metronidazole-nitroreductase macrophage ablation model**

622

623 In order to selectively ablate macrophages prior to cardiac injury, embryos were  
624 incubated as previously described until 48 hpf and then treated as follows. Embryos  
625 were carefully dechorionated at 48 hpf and screened based on fluorescence and split  
626 into groups appropriate to the experiment, for example larvae were always split into  
627 *csf1ra:gal4;UAS:NfsB-mCherry+* and *csf1ra:gal4;UAS:NfsB-mCherry-*. Embryos were  
628 then transferred to either conditioned water or a 0.5mM metronidazole (Thermo Fisher  
629 Scientific) solution, both solutions also contained 0.003% phenylthiourea (Thermo  
630 Fisher Scientific) and 0.2% DMSO (Sigma Aldrich). Larvae were then incubated in  
631 these solutions in the dark at 28. 5°C for 24 hours prior to injury at 72 hpf. Larvae were  
632 then removed from the metronidazole solution and vehicle solution and placed in fresh  
633 conditioned water + 0.003% phenylthiourea for the remainder of the experiment. As

634 shown in Figure 2, this is sufficient to ablate macrophages prior to injury and  
635 completely block subsequent macrophage recruitment to the injured heart.

636

### 637 **Neutral red staining**

638

639 Larvae were incubated at 72 hpf in 5µg/mL neutral red in conditioned water for 5 hours  
640 in the dark at 28.5°C. Larvae were then washed twice for 5 minutes in conditioned  
641 water, anaesthetised with 40 µg/ml tricaine methanesulfonate and imaged by  
642 brightfield microscopy on a Leica M205 FA stereomicroscope.

643

### 644 **Genotyping of *irf8*<sup>-/-</sup> mutants**

645

646 Adult (>30 dpf) zebrafish arising from heterozygous *irf8* mutant incrosses were  
647 anaesthetised in 40 µg/ml tricaine methanesulfonate and a lobe of caudal fin removed  
648 by scalpel. After clipping, fins were digested to extract DNA using 10mg/ml Prot K,  
649 incubated at 65°C for 1 hour. This incubation ends with 15 minutes at 95°C to denature  
650 the Proteinase K. A section of *irf8* flanking the mutation locus was then amplified from  
651 the extracted DNA by PCR using Forward -ACATAAGGCGTAGAGATTGGACG and  
652 Reverse -GAAACATAGTGCGGTCCTCATCC primers and REDTaq® ReadyMix™  
653 PCR Reaction Mix. The PCR product was then digested for 30 minutes at 37 °C using  
654 AVA1 restriction enzyme (New England Bioscience) and the product run on a 2%  
655 agarose gel. WT = Aval digest site is present = PCR product is cleaved to give two  
656 bands with sizes of approximately 200 and 100 bp. *irf8*<sup>-/-</sup> = Aval digest site is absent  
657 due to mutation = PCR product is not cut. A single band is observed with a size of 286  
658 bp. *irf8*<sup>+/-</sup> = Three bands as above.

659

### 660 **Microinjection recombinant proteins and intravital stains**

661

662 Microinjections were performed on larvae at 72 hpf using a Narishige IM-300  
663 Microinjector and pulled thin wall glass capillaries (Harvard Apparatus), administered  
664 under anaesthesia by intravenous microinjection through the cardiac sinus venosus  
665 (SV) that drains the common cardinal vein (CCV). An injection volume of 1 nL was  
666 used for all intravenous injections to minimise disruption to blood volume.

667

668 For propidium iodide intravital staining, 1nL 100µg/ml propidium iodide in DPBS was  
669 injected immediately following injury at 0.5 hpi. Larvae were then immediately imaged  
670 by heartbeat-synchronised light-sheet microscopy at 1 hpi. Injection of recombinant  
671 zflIFN-γ-rel (IFN-1.1) (Kingfisher Bioscience) was administered as a single 1nL 132nM  
672 dose at 72 hpf. Lyophilised IFN- γ-rel was reconstituted in PBS + 0.1% BSA (carrier  
673 protein) and PBS + 0.1% BSA was used as the vehicle control solution. Injections of  
674 recombinant zfVEGFaa (Kingfisher Bioscience) were administered as single 1nL 0.25  
675 ug/ul doses at 72 hpf (protein reconstituted as above).

676

### 677 **Histological staining**

678

679 To detect cell death at the injured ventricle, whole-mount larval TUNEL staining was  
680 performed. Larvae were fixed in 4% PFA for 30 minutes and transferred to 1:10 dilution  
681 of PBS. Larvae were subsequently digested in 1 µg/ml Proteinase K for 1 hour. Larvae  
682 were re-fixed in 4% PFA for 20 minutes and subsequently washed in PBT. TUNEL  
683 staining was performed using ApopTag Red In situ kit (MilliporeSigma) to label  
684 apoptotic cells, as described previously<sup>26</sup>. Stained hearts were imaged using LSFM.

685

686 EdU staining was performed by incubating larvae in 1 mM EdU (5-ethynyl-2'-  
687 deoxyuridine) (Abcam) in 1 % DMSO (Sigma Aldrich) in conditioned water + 0.003%  
688 phenylthiourea (Thermo Fisher Scientific) for 24 hours beginning either at 0 hpi or 24  
689 hpi depending on the experiment. Larvae were incubated at 28.5°C in the dark. Larvae  
690 were then fixed for 2 hours at room temperature in 4% PFA, permeabilised in  
691 permeabilisation solution (PBS-Triton-X 0.1% + 1% Tween + 1% DMSO) and  
692 pericardium punctured using a glass microinjection needle (further improving  
693 permeability). Larvae were then washed twice in PBS-3% BSA and incubated for 2  
694 hours at room temperature in CLICK reaction mixture from Click-iT™ EdU Imaging Kit  
695 with Alexa Fluor™ 594 (Invitrogen) made according to manufacturers' instructions.  
696 Larvae were finally washed once in PBS-3%BSA and twice in PBS-0.1% tween and  
697 imaged by LSFM.

698

### 699 **Heart lesion size quantification**

700

701 Larval hearts expressing the transgene *myl7:GFP* were imaged by heartbeat-  
702 synchronised light-sheet imaging as described above. Exposure was kept consistent  
703 at 10ms, along with z slice spacing (1  $\mu$ m), and heart contraction phase was locked to  
704 mid diastole for all larvae. Z stacks were surface rendered in IMARIS (Bitplane) based  
705 on absolute intensity, and software-suggested segmentation and rendering  
706 parameters. Lesion area, visualised as a render-free hole in the myocardium, was then  
707 traced around manually and lesion area quantified in FIJI (National Institutes of  
708 Health)<sup>74</sup>.

709

### 710 **Ventricular ejection fraction analysis**

711

712 Larval hearts of *Tg(myl7:GFP)* larvae were imaged at 80 fps in brightfield using a Leica  
713 M205 FA epifluorescence stereomicroscope, to capture when the ventricle was in  
714 diastole and systole. The ventricular area in diastole and systole was measured  
715 manually in FIJI and ventricular ejection fraction calculated using the formula  $100 \times$   
716  $[(\text{Diastolic Area} - \text{Systolic Area}) / \text{Diastolic Area}]^{25}$ . Ventricular ejection fraction by area  
717 was then converted to ejection fraction by volume using the formula 'Ejection fraction  
718 by area  $\times 2.33 =$  Ejection fraction by volume' derived in Supplementary Figure 4. Over  
719 the small range of ejection fractions that occur in larval hearts, the relationship can be  
720 considered to approximate to a linear one.

721

### 722 **Quantification of cell number by image analysis**

723

724 To quantify the number of cardiomyocytes in *Tg(myl7:h2b-GFP)* and  
725 *Tg(myl7:nlsDsRed)* larval hearts, z stacks of hearts acquired by LSM were imported  
726 into FIJI and nuclei counted using the plugin Trackmate. Briefly, key segmentation  
727 parameters 'Estimated blob diameter'=5.5, 'Threshold'=0.9 were taken as a starting  
728 point, and optimised manually per experiment until all nuclei are counted successfully.  
729 The heart atrium is excluded manually by x coordinate filtering and ventricular  
730 cardiomyocytes are then automatically counted by the plug in.

731

732 In order to automatically quantify the percentage of EdU+ ventricular cardiomyocytes  
733 in *Tg(myl7:h2b-GFP)* larval hearts, a custom FIJI macro was written to exclude non-  
734 cardiomyocyte EdU signal. This is necessary as cardiomyocytes have a much lower

735 turnover rate than surrounding cells in the pericardium, endocardium and blood and  
736 so represent a minority of EdU+ cells. Briefly, the Bersen segmentation method was  
737 used to mask areas of GFP fluorescence per z slice and these masks subsequently  
738 applied as a crop RoI to EdU signal in the 641 nm colour channel of RGB images.  
739 Slices were then reassembled and merged into maximum intensity projections, where  
740 the FIJI<sup>74</sup> Trackmate plugin was used to count both the total number of GFP+  
741 cardiomyocyte nuclei and EdU+ cardiomyocyte nuclei. This quantification then allowed  
742 the percentage of EdU+ cardiomyocytes to be calculated in an unbiased way per larval  
743 heart.

744

745

#### 746 **Quantification of notch signalling by image analysis**

747

748 In order to objectively identify whether the hearts from *Tg(Tp1:venus-PEST)* larvae  
749 possessed venus signal in the endocardium above that of background, and were  
750 therefore 'notch+', the following approach was used. Treatment groups were blinded  
751 to the analyser, and z stacks opened in FIJI. The automatic brightness and contrast  
752 function was used to objectively enhance the signal in the heart, and the clear interface  
753 between the granular autofluorescence of the chamber blood and the smooth  
754 autofluorescence of the myocardium searched for venus expression. The distinctive  
755 morphology and location of endothelium allowed for unambiguous identification of  
756 venus+ status.

757

#### 758 **Pharmacological inhibition of larval signalling**

759

760 To inhibit VEGF signalling, larvae were bathed in pan-VEGFR antagonist  
761 AV951/Tivozanib (Strattech Scientific) 0-48 hpi. AV951 was dissolved in 0.1% DMSO  
762 in conditioned water + 0.003% phenylthiourea to make a 10 nM solution, with just 0.1%  
763 DMSO in conditioned water + 0.003% phenylthiourea becoming the vehicle control. In  
764 order to pulse larvae with EdU, the original solution was replaced fresh solution, with  
765 the addition of 1mM EdU at 1% DMSO.

766

767 To inhibit notch signalling, larvae were bathed in gamma secretase inhibitor DAPT  
768 (Cambridge Bioscience) 0-48 hpi. DAPT was dissolved in 0.2% DMSO in conditioned

769 water + 0.003% phenylthiourea to make a 100 $\mu$ M solution, with just 0.2% DMSO in  
770 conditioned water + 0.003% phenylthiourea becoming the vehicle control. Note, DAPT  
771 must be dissolved in DMSO prior to the addition of water to prevent precipitation.

772

773 In order to inhibit neuregulin-ERBB signalling, the ErBB2 antagonist AG1478 was  
774 used. Larvae were bathed in 1.75  $\mu$ M AG1478 (Cambridge Bioscience) dissolved in  
775 0.25% DMSO in conditioned water + 0.003% phenylthiourea over 0-48 hpi.

776

### 777 **Extraction of larval hearts and RNA extraction**

778

779 Following laser injury at 72 hpf *Tg(myl7:gal4::GFP;UAS:mRFP)* larvae were incubated  
780 at 28.5°C in conditioned media/water + 0.1% methylene blue (w/v) + 0.003%  
781 phenylthiourea. At 48 hpi uninjured and injured larvae were given an overdose of  
782 tricaine at 400  $\mu$ g/ml, following which hearts were extracted. We adapted the protocol  
783 of Burns and MacRae<sup>75</sup> to increase the yield of heart retrieval from ~50% to ~70%.  
784 Briefly, ~30 larvae were placed in 2mL eppendorf tubes, the conditioned water drained  
785 and replaced with ice cold Leibovitz's L-15 Medium supplemented with 10% FCS. A  
786 19-gauge needle coupled to a 5mL syringe was used to shear the larvae by aspiration  
787 and therefore dissociate hearts from the rest of the larva. The lysate was then  
788 inspected by epifluorescence microscopy and mRFP+ hearts and collected to be kept  
789 on ice. Hearts were then digested at for 10 minutes at 4°C in protease solution (5 mM  
790 CaCl<sub>2</sub>, 10 mg/ml B. Licheniformis protease, 125 U/mL DNase I in 1x PBS) with  
791 occasional aspiration to aid digestion, RNA was then extracted using a RNeasy Plus  
792 Micro Kit (Qiagen) following direct lysis with RLT lysis buffer according to  
793 manufacturer's instructions. RNA concentration was measured by Qubit and integrity  
794 by Bioanalyser. RIN score for all samples ranged between 9.6-10.

795

### 796 **RNAseq analysis**

797

798 RNA was sequenced by Genewiz, Leipzig, Germany using Illumina NovaSeq, PE  
799 2x150. Genewiz also used *deseq2* package in R to evaluate sequencing quality, trim  
800 reads, map to the *Danio rerio* genome and generate gene counts/hits. Sequence reads  
801 were trimmed using Trimmomatic v.0.36. The trimmed reads were mapped to the  
802 *Danio rerio* GRCz10.89 reference genome available on ENSEMBL using the STAR



803 aligner v.2.5.2b. Unique gene hit counts were calculated by using featureCounts from  
804 the Subread package v.1.5.2. Only unique reads that fell within exon regions were  
805 counted. The Wald test was used to generate p-values and log<sub>2</sub> fold changes. A gene  
806 ontology analysis was performed on the statistically significant set of genes by  
807 implementing the software GeneSCF v.1.1-p2. The zfin GO list was used to cluster  
808 the set of genes based on their biological processes and determine their statistical  
809 significance. The volcano plot was generated by a custom R script and heatmap  
810 constructed using the pHeatmap package. For the heatmap z scaled log<sub>2</sub>(Reads)  
811 were clustered via Pearson correlation and clusters thresholded based on the resulting  
812 dendrogram. The heatmap was generated using the pHeatmap function in R.

813

## 814 **Statistics**

815

816 Graphs and statistics were curated in GraphPad Prism 9.1 software (GraphPad  
817 Software). Data were analysed by student *t*-test, one-way ANOVA or two-way ANOVA  
818 followed by an appropriate multiple comparison *post hoc* test. All statistical tests, *p*-  
819 values and *n* numbers used are given in figure legends, *p*<0.05 was deemed  
820 significant in all experiments.

821

## 822 **Acknowledgments**

823

824 This work was funded by a British Heart Foundation (BHF) CoRE award  
825 (RE/13/3/30183), Medical Research Scotland studentship (PhD-1049-2016), NC3R  
826 studentship (NC/P002196/1), BHF New Horizons grant (NH/14/2/31074), and a  
827 Medical Research Council UK award (MR/K013386/1). Bioinformatics and RNAseq  
828 performed by Genewiz, Leipzig, Germany. We also acknowledge Amelia Edmondson-  
829 Stait, University of Edinburgh, for her advice and input on RNAseq analysis.

830

## 831 **Author Contributions**

832

833 FAB conceived of and designed the study. FAB, AK and GM carried out all  
834 experiments. Image analysis was performed by FB and AK. LSFM-related technical  
835 contributions were provided by JMT. FAB wrote the manuscript. KRS, MEMO, EGS  
836 and MB provided expertise regarding all RNA work. KRS helped optimise larval heart

837 extraction and RNA extraction. JMT, CST, MEMO, JJM, GM, MB, AGR, and MAD  
 838 edited the manuscript. MAD, AGR, and CST supervised the study. All authors  
 839 contributed to the article and approved the submitted version.

840

841 **Figures**

842

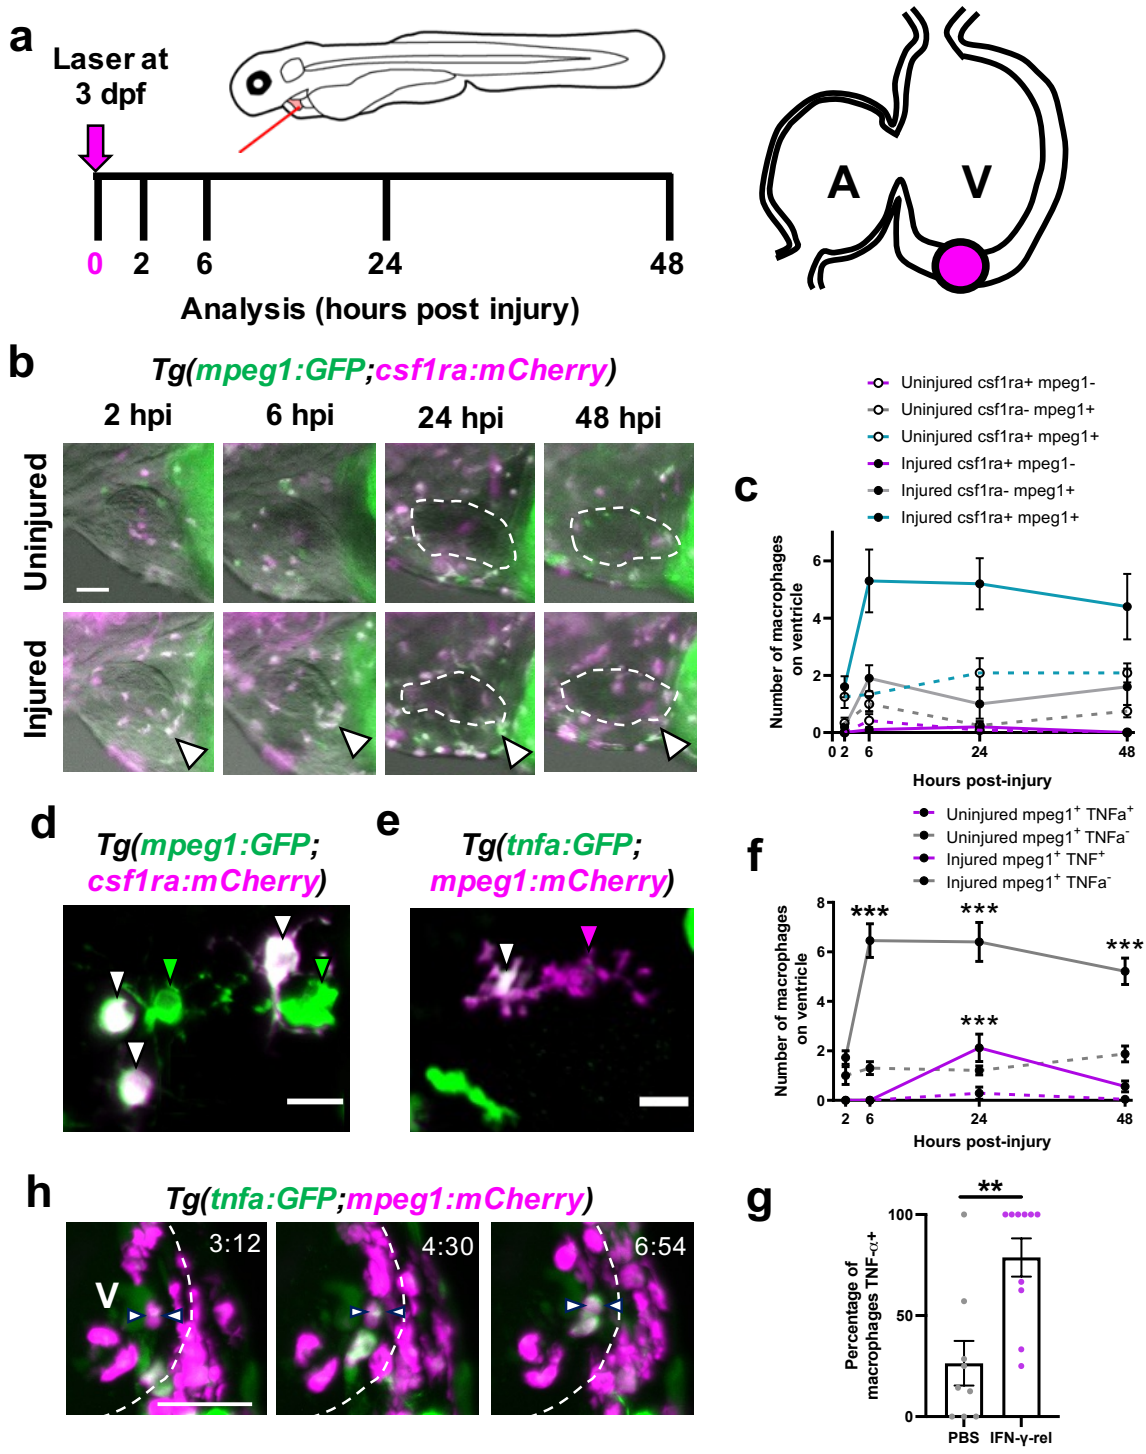

843

844 **Figure 1: Cardiac macrophages display heterogeneity and plasticity following**  
845 **injury.**

846 (a) Schematic illustrating the cardiac laser injury model, with imaging timepoints  
847 marked (left) and the injury site at ventricular apex of a 3 dpf larval heart marked  
848 (magenta circle) (right). (b) Representative lateral view epifluorescence images of  
849 uninjured and injured hearts at the standard timepoints in  
850 *Tg(mpeg1:GFP;csf1ra:gal4:UAS:NfsB-mCherry)* (abbreviated to  
851 *mpeg1:GFP;csf1ra:mCherry* in all panels) illustrating macrophage heterogeneity,  
852 white arrow = ventricular apex; dashed line = heart outline. (c) Quantification of the  
853 number of *csf1ra+mpeg1-*, *csf1ra-mpeg1+* and *csf1ra+mpeg1+* macrophages on the  
854 ventricle in uninjured and injured larvae at standard timepoints, n=10-12. (d)  
855 Representative LSFM image of *csf1ra-mpeg1+* and *csf1ra+mpeg1+* macrophages of  
856 different morphologies. (e) Representative LSFM image of *tnfa+mpeg1+* and *tnfa-*  
857 *mpeg1+* macrophages. (f) Quantification of number of *tnfa+mpeg1+* and *tnfa-mpeg1+*  
858 macrophages on the ventricle in uninjured and injured larvae at standard timepoints,  
859 n=10-25. (g) Time-lapse timepoints for injured *Tg(tnfa:GFP;mpeg1:mCherry)*  
860 ventricles imaged live in the larvae by heartbeat-synchronised LSFM microscopy  
861 illustrating macrophage plasticity. Timestamps indicated, dashed line = ventricle  
862 outline; arrows = macrophage converting to *tnfa+*. (h) Quantification of the percentage  
863 of *tnfa+* macrophages at 24 hpi following injection with IFN- $\gamma$ -rel or PBS, n=10. Scale  
864 bar = 50 $\mu$ m (b & h), 10 $\mu$ m (d & e). \*\* $p \leq 0.01$ , \*\*\* $p \leq 0.001$ , (c & f) 2way ANOVA followed  
865 by Holm-Sidak's Post-hoc test and (g) ttest.  
866

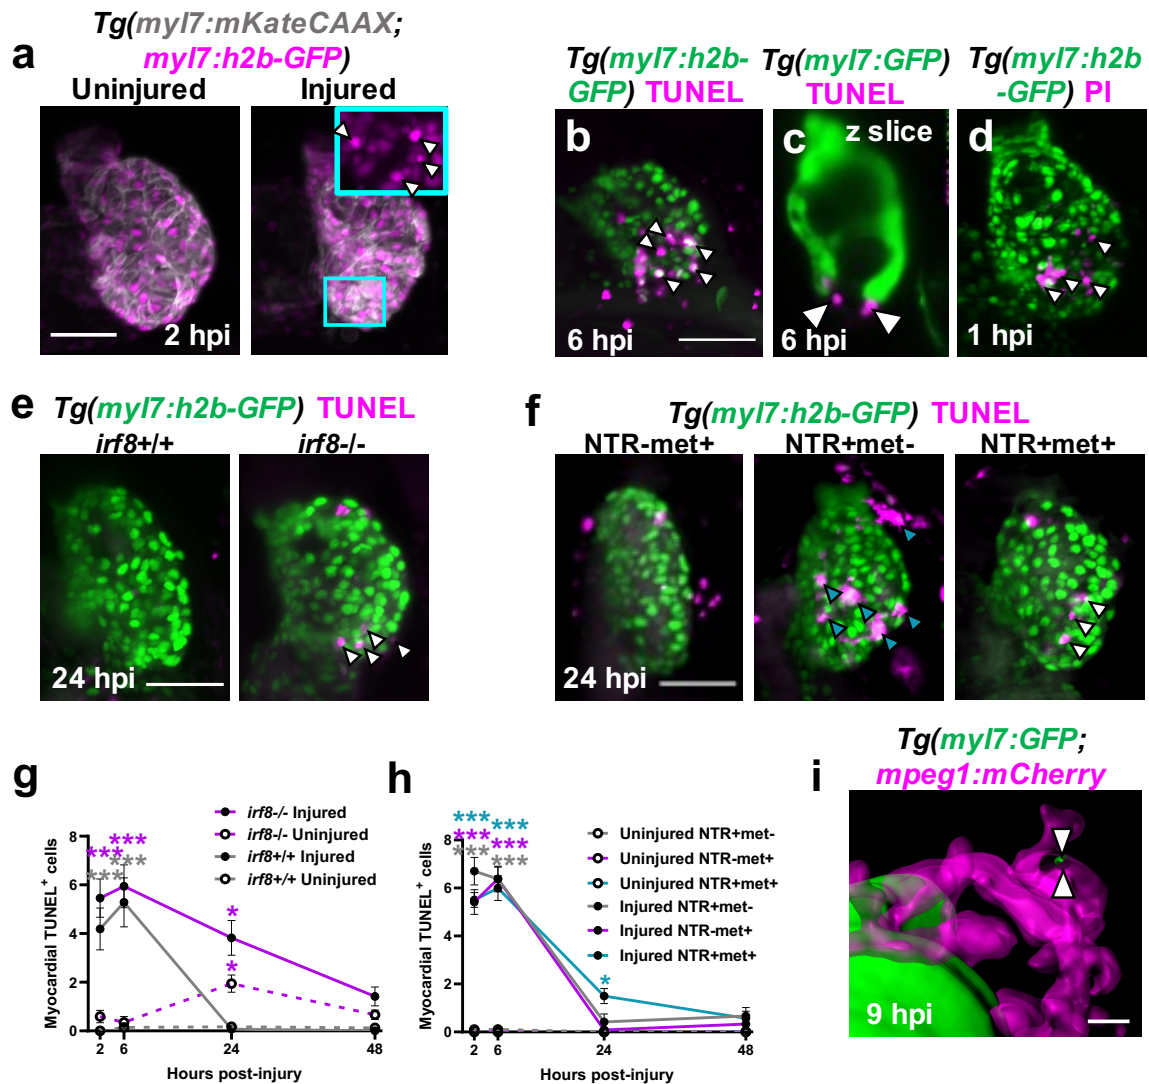

867

868 **Figure 2: Macrophages are required for timely removal of apoptotic**  
869 **cardiomyocytes.**

870 (a) Representative LSFM images of uninjured and injured *Tg(myI7:h2b-*  
871 *GFP;myI7:mKateCAAX)* ventricles. Cyan outlined zoom panel highlights condensed  
872 nuclei (white arrowheads). Representative LSFM images of TUNEL stained hearts 6  
873 hpi in (b) *Tg(myI7:h2b-GFP)* and (c) *Tg(myI7:GFP)* larvae. White arrowheads =  
874 apoptotic cardiomyocytes/myocardium. (d) Representative LSFM image of a  
875 propidium iodide (PI) stained *Tg(myI7:h2b-GFP)* heart at 1 hpi. White arrowheads =  
876 necrotic debris. (e) Representative LSFM images of *irf8<sup>+/+</sup>* and *irf8<sup>-/-</sup>* *Tg(myI7:h2b-GFP)*  
877 hearts stained by TUNEL at 24 hpi. White arrowheads = TUNEL+ cells. (f)  
878 Representative LSFM images of injured *Tg(myI7:h2b-GFP;csfr1a:NfsB-mCherry)*  
879 ventricles per macrophage ablation model injury group at 24 hpi. Cyan arrowheads =  
880 Macrophages and white arrowheads = TUNEL+ cells. (g) Quantification of TUNEL+

881 myocardial cells in uninjured and injured, *irf8*<sup>+/+</sup> and *irf8*<sup>-/-</sup> *Tg(myl7:h2b-GFP)* ventricles,  
882 n=15-29. (h) Quantification of TUNEL+ myocardial cells in uninjured and injured  
883 *Tg(myl7:h2b-GFP;csfr1a:NfsB-mCherry)* ventricles per macrophage ablation group,  
884 n=10-12. (i) Surface render of LSFM-acquired z stack, surfaced-rendered with 50 %  
885 transparency at 9 hpi, showing internalised myocardial debris (white arrowheads) in a  
886 macrophage in a *Tg(myl7:GFP;mpeg1:mCherry)* larva. Scale bars = 50  $\mu$ m for panels  
887 a-f and 20  $\mu$ m for panel (i). All images are 3D LSFM shown as maximum intensity  
888 projections unless otherwise stated. \* $p \leq 0.05$ , \*\* $p \leq 0.01$ , \*\*\* $p \leq 0.001$  2way ANOVA  
889 followed by Holm-Sidak's Post-hoc tests.  
890

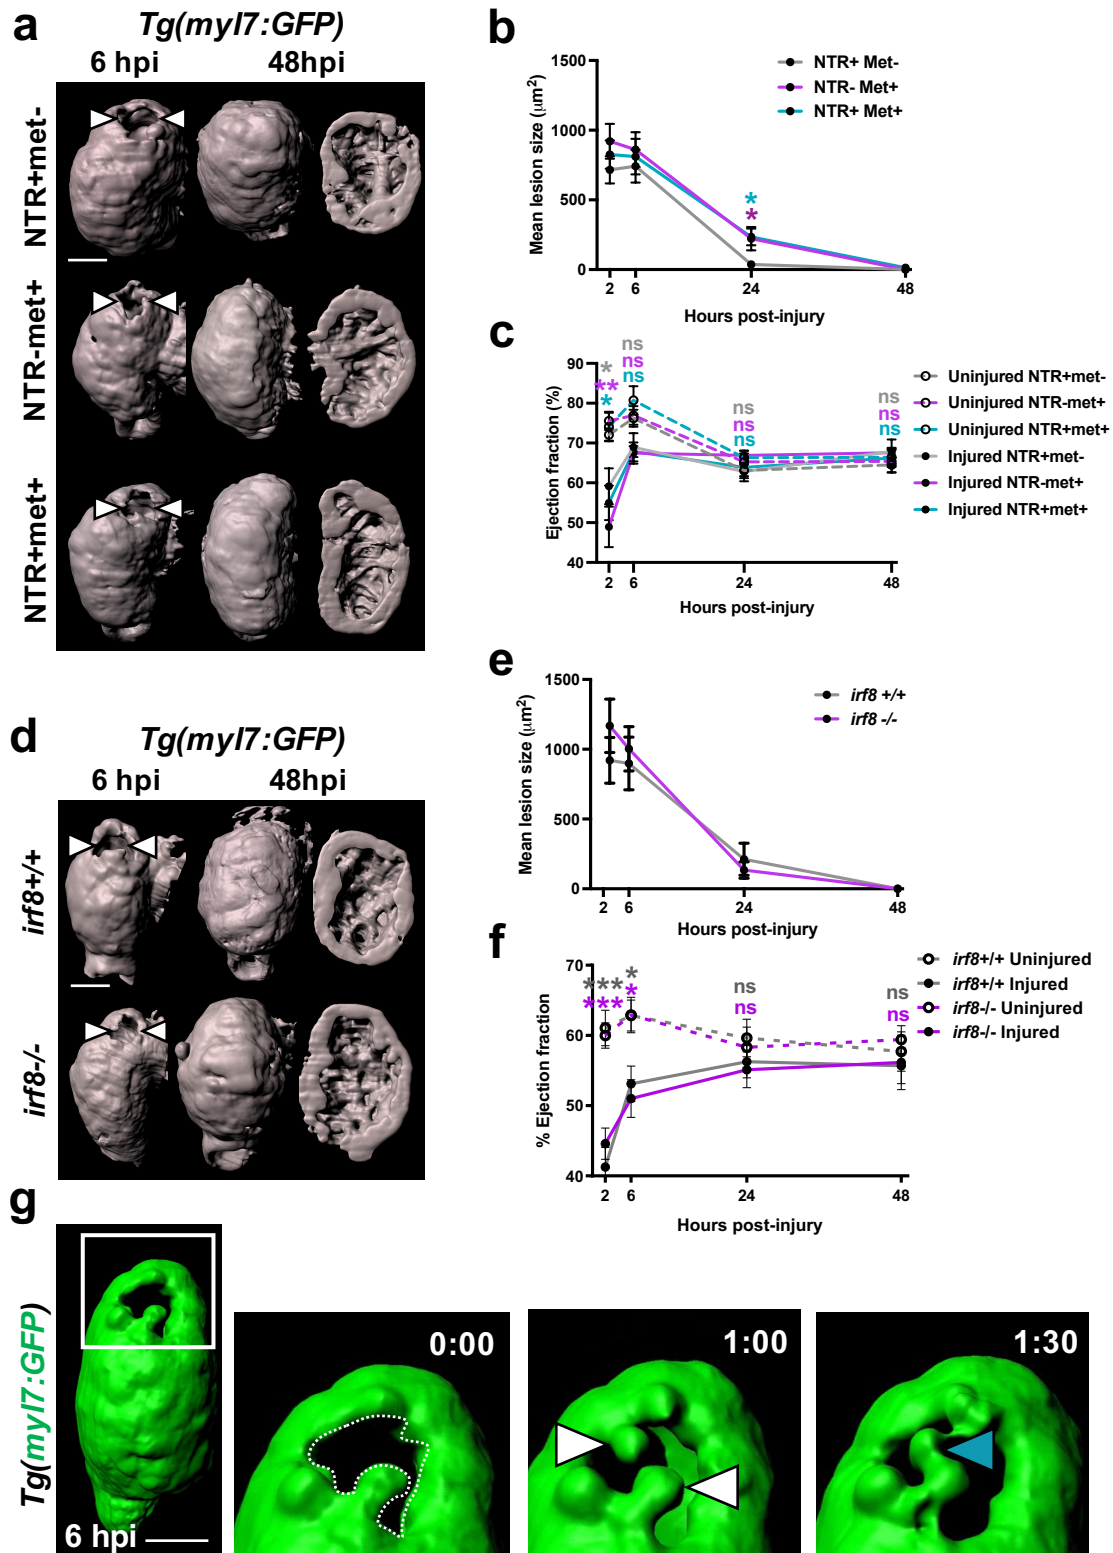

891

892 **Figure 3: Macrophages not required for the recovery of cardiac structure or**  
 893 **function.**

894 (a) Representative GFP surface-renders of LSFM z-stacks of injured ventricles in  
 895 *Tg(myI7:GFP;csfr1a:NfsB-mCherry)* larvae, macrophage ablation groups as indicated

896 in the figure. Abluminal myocardial surface is shown at 6 hpi (left) and abluminal and  
897 luminal surfaces shown at 48 hpi following regeneration (middle & right). White  
898 arrowheads = laser lesion. (b) Quantification of mean lesion size in injured  
899 *Tg(myI7:GFP;csfr1a:NfsB-mCherry)* larvae per macrophage ablation group, n=11-22.  
900 (c) Quantification of ventricular ejection fraction in uninjured and injured  
901 *Tg(myI7:GFP;csfr1a:NfsB-mCherry)* larvae per macrophage ablation group, n=10-12.  
902 (d) Representative GFP surface-renders of light-sheet-acquired z-stacks of injured  
903 ventricles from *irf8<sup>+/+</sup>* and *irf8<sup>-/-</sup>* *Tg(myI7:GFP)* larvae. Abluminal myocardial surface is  
904 shown at 6 hpi (left) and abluminal and luminal surfaces shown at 48 hpi following  
905 regeneration (middle & right). White arrowheads = laser lesion. (e) Quantification of  
906 mean lesion size in injured *irf8<sup>+/+</sup>* and *irf8<sup>-/-</sup>* *Tg(myI7:GFP)* larvae, n=15. (f)  
907 Quantification of ventricular ejection fraction in uninjured and injured *irf8<sup>+/+</sup>* and *irf8<sup>-/-</sup>*  
908 *Tg(myI7:GFP)* larvae n=15-20. (g) Time-lapse timepoints of a GFP-surface-rendered,  
909 injured *Tg(myI7:GFP)* ventricle from 6 hpi. White box = zoom panel; white arrowheads  
910 = myocardial buds, cyan arrowhead = myocardial bridge. \* $p \leq 0.05$ , \*\*\* $p \leq 0.001$  2way  
911 ANOVA followed by Holm-Sidak's Post-hoc tests. Scale bars = 50  $\mu\text{m}$   
912

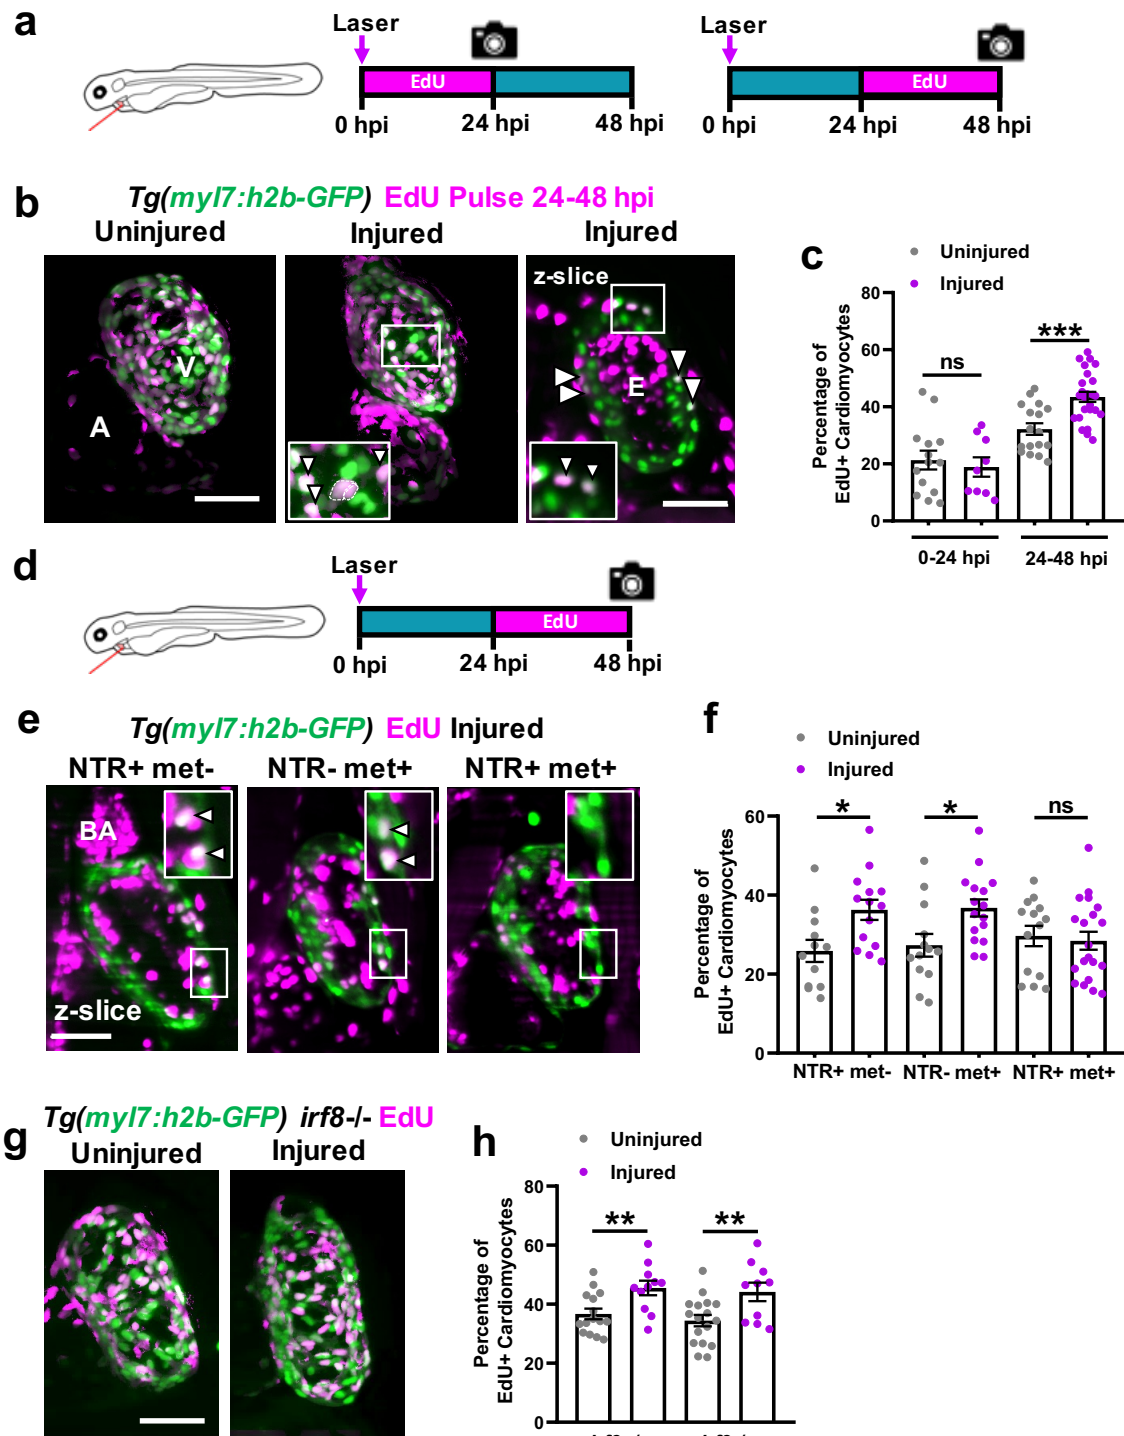

913

914 **Figure 4: Macrophage ablation abolishes injury-dependent cardiomyocyte**  
 915 **proliferation.**

916 (a) Schematic illustrating EdU pulse strategy for labelling proliferating cardiomyocytes  
 917 over 0-24 hpi (left) and 24-48 hpi (right). (b) Representative images of EdU-stained  
 918 hearts from *Tg(myI7:h2b-GFP)* at 48 hpi. Non-myocardial EdU signal is excluded post-  
 919 acquisition to allow interpretable maximal intensity projections (MIPs). A = atrium, v =



920 ventricle; white boxes = zoom panels; white arrowheads = EdU+ cardiomyocyte nuclei  
921 and dashed line = outline of dividing cardiomyocyte daughter nuclei. (c) Quantification  
922 of the percentage of ventricular EdU+ cardiomyocytes in uninjured and injured  
923 *Tg(myI7:h2b-GFP)* hearts pulsed over 0-24 hpi or 24-48 hpi. \*\*\* $p \leq 0.001$  unpaired t  
924 test. (d) Schematic illustrating EdU pulse strategy for labelling proliferating  
925 cardiomyocytes over 24-48 hpi in *Tg(myI7:h2b-GFP;csfr1a:NfsB-mCherry)* larvae per  
926 standard macrophage ablation groups. (e) Representative images of EdU-stained  
927 hearts from *Tg(myI7:h2b-GFP;csfr1a:NfsB-mCherry)* acquired by light-sheet  
928 microscopy at 48 hpi. White boxes = zoom panels; white arrowheads = EdU+  
929 cardiomyocyte nuclei and BA = bulbous arteriosus. (f) Quantification of the percentage  
930 of ventricular EdU+ cardiomyocytes in uninjured and injured *Tg(myI7:h2b-*  
931 *GFP;csfr1a:NfsB-mCherry)* hearts pulsed over 24-48 hpi. \* $p \leq 0.05$  Kruskal-Wallis test  
932 and Dunn's multiple comparison post-hoc test. (g) Representative images of uninjured  
933 and injured EdU-stained hearts from *irf8<sup>-/-</sup> Tg(myI7:h2b-GFP)* acquired by light-sheet  
934 microscopy at 48 hpi. Non-myocardial EdU signal is excluded post-acquisition to allow  
935 interpretable maximal intensity projections. (h) Quantification of the percentage of  
936 ventricular EdU+ cardiomyocytes in uninjured and injured *irf8<sup>+/+</sup>* and *irf8<sup>-/-</sup>*  
937 *Tg(myI7:h2b-GFP)* hearts pulsed 24-48 hpi. All images are maximum intensity  
938 projections of 3D LSM stacks, unless otherwise stated. Scale bars = 50  $\mu\text{m}$ . \*\* $p \leq 0.01$   
939 unpaired t test  
940

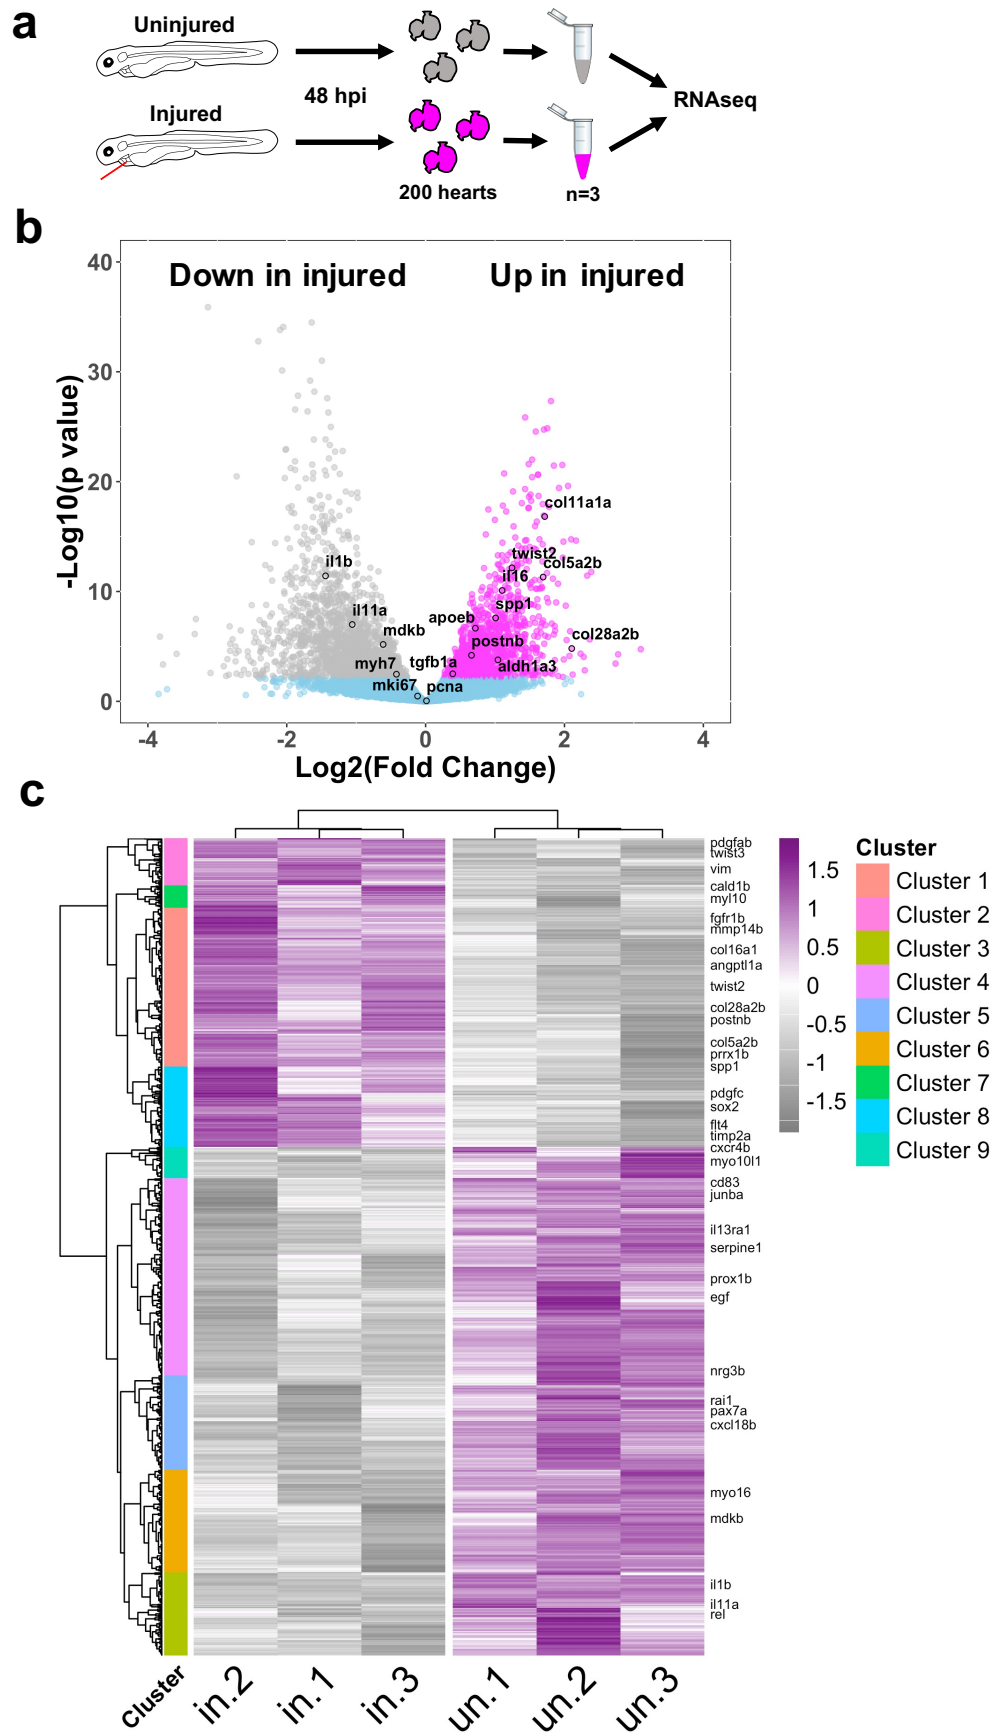

941

942 **Figure 5: Bulk RNAseq analysis of larval hearts following injury**

943 (a) Schematic illustrating the extraction of uninjured and injured hearts at 48 hpi and  
944 the pooling of 200 hearts per biological replicate for RNAseq, n=3. (b) Volcano plot  
945 showing the  $\text{Log}_2(\text{Fold Change})$  and  $-\text{Log}_{10}(\text{p value})$  for transcripts of each detected  
946 gene. Genes whose adjusted p values fall below 0.05 are deemed statistically non-  
947 significant and coloured blue. Genes up regulated in injured hearts are coloured  
948 magenta and those upregulated in uninjured hearts are coloured grey. (c) Heatmap  
949 displaying statistically significantly differentially expressed genes with a  $\text{Log}_2(\text{Fold}$   
950  $\text{Change}) > 0.5$ . Genes were hierarchically clustered by Pearson correlation with z  
951 scaling. Clusters are indicated on the left with their dendrogram. Magenta = high  
952 expression; grey = low expression. Genes with relevance to cardiac regeneration are  
953 highlighted as annotations on the right of the plot. n=3  
954

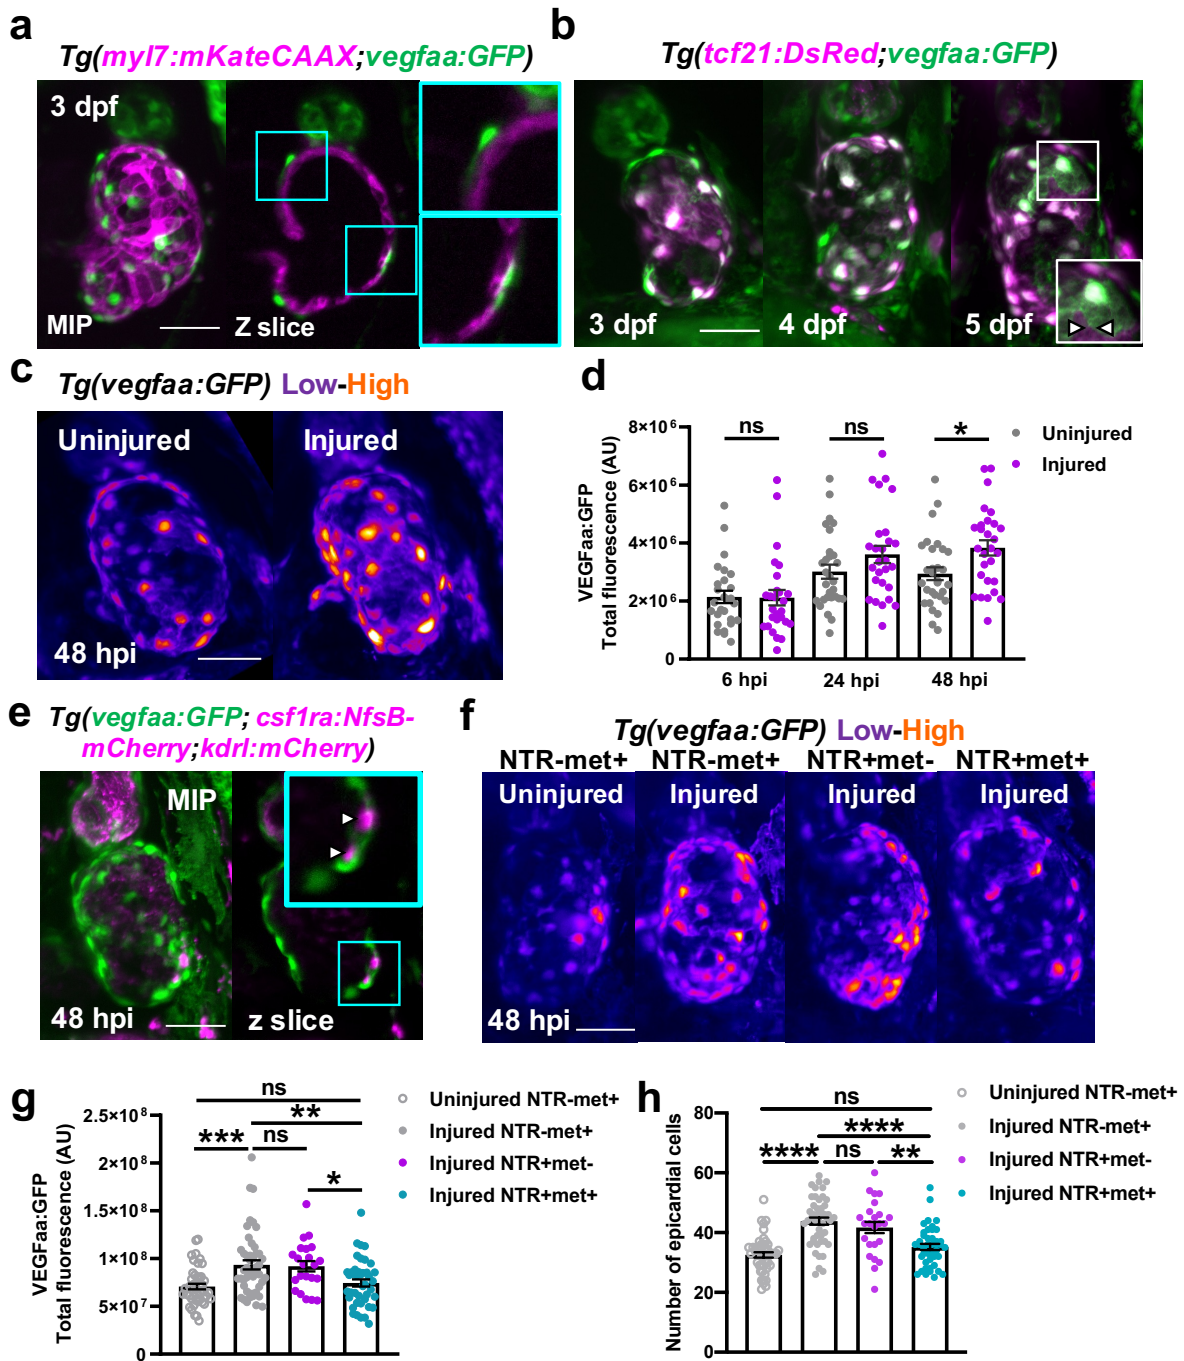

955

956

957

958

959

960

961

962

963

**Figure 6: Macrophages stimulate epicardial cell number expansion following cardiac injury.**

(a) Representative LSFM image of an uninjured 3 dpf ventricle from a *Tg(myI7:mKateCAAX;myI7:h2b-GFP)* larva showing *vegfaa*<sup>+</sup> cells (green) overlying myocardium (magenta). Cyan box = zoom panel. (b) Representative images of 3, 4 and 5 dpf ventricles from a *Tg(tcf21:DsRed;vegfaa:GFP)* larvae acquired by LSFM, showing high colocalization of *vegfaa* with epicardial marker *tcf21*. White arrowheads = heterogenous marker expression and white box = zoom panel. (c) Representative

964 images of uninjured and injured ventricles from *Tg(vegfaa:GFP)* larvae acquired at 48  
965 hpi by LSM. “Heat” LUT applied to highlight increased intensity of epicardial  
966 *vegfaa:GFP* in injured hearts. (d) Quantification of total ventricular *VEGFaa:GFP*  
967 fluorescence in uninjured and injured hearts over standard injury model timepoints,  
968  $n=28-30$ .  $*p\leq 0.05$  One way ANOVA followed by Holms-Sidak’s multiple comparison  
969 Post-hoc tests. (e) Representative image of a ventricle from a  
970 *Tg(vegfaa:GFP;csfr1a:NfsB-mCherry;kdrl:hsa.HRAS-mCherry)* (abbreviated to  
971 *kdrl:mCherry*) larva at 48 hpi showing macrophages in the epicardial-myocardial niche  
972 (white arrowheads). Cyan box = zoom panel. (f) Representative LSM images of  
973 uninjured and injured ventricles from *Tg(vegfaa:GFP;csfr1a:NfsB-mCherry)* larvae  
974 from metronidazole-nitroreductase macrophage ablation groups at 48 hpi. “Heat” LUT  
975 is applied to highlight increase in overall fluorescence in injured groups except  
976 NTR+met+. (g) Quantification of total *vegfaa:GFP* fluorescence (g) and epicardial cell  
977 number (h) in uninjured and injured ventricles from *Tg(vegfaa:GFP;csfr1a:NfsB-*  
978 *mCherry)* larvae from metronidazole-nitroreductase macrophage ablation groups at  
979 48 hpi. All images are maximum intensity projections of 3D LSM stacks. Scale bars  
980 = 50  $\mu\text{m}$ ,  $n=46$ .  $*p\leq 0.05$ ,  $**p\leq 0.01$ ,  $***p\leq 0.001$  One way ANOVA followed by Holms-  
981 Sidak’s multiple comparison Post-hoc tests.  
982  
983

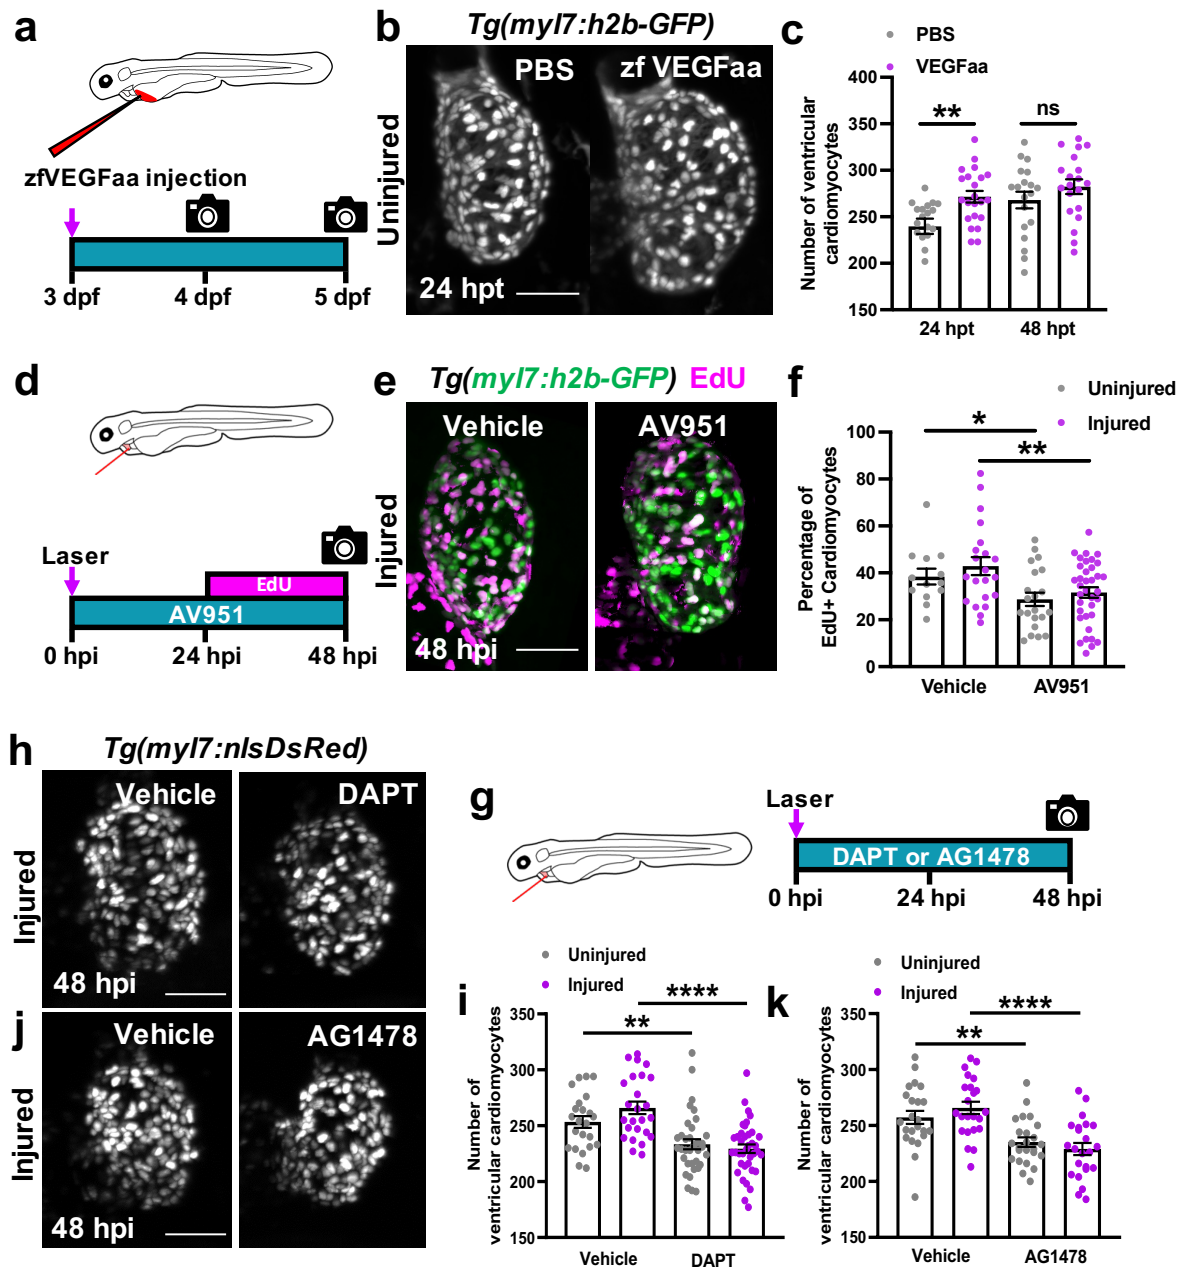

984

985 **Figure 7: VEGFaa signalling is both sufficient and necessary to drive**  
 986 **cardiomyocyte proliferation.**

987 (a) Schematic illustrating zfVEGFaa treatment strategy via microinjection into the  
 988 common cardinal vein of uninjured larvae at 72 hpi. (b) Representative LSFM images  
 989 of *Tg(myI7:h2b-GFP)* larvae at 24 hpi treated with PBS 0.1% BSA or zfVEGFaa 0.1%  
 990 BSA injection. (c) Quantification of ventricular cardiomyocyte number in *Tg(myI7:h2b-*  
 991 *GFP)* larvae at 24 and 48 hpi treated with PBS 0.1% BSA or zfVEGFaa 0.1% BSA  
 992 injection, n=20. \*\*p < 0.01 unpaired t test. (d) Schematic illustrating AV951 treatment  
 993 and EdU pulsing strategy for uninjured and injured larvae. (e) Representative images  
 994 of injured ventricles from *Tg(myI7:h2b-GFP)* larvae, EdU stained and bathed in vehicle

995 or AV951, imaged at 48 hpi by LSM. Non-myocardial EdU signal is excluded post-  
996 acquisition to allow interpretable maximal intensity projections (MIPs). (f)  
997 Quantification of the percentage of EdU+ cardiomyocyte nuclei from uninjured and  
998 injured ventricles from *Tg(myI7:h2b-GFP)* larvae, EdU stained and bathed in vehicle  
999 or AV951, n=13-36. \* $p \leq 0.05$ , \*\* $p \leq 0.01$  unpaired t test. (g) Schematic illustrating the  
1000 treatment strategy for DAPT and AV951 bathing of uninjured and injured larvae. (h)  
1001 Representative images of injured *Tg(myI7:nlsDsRed)* larvae treated with vehicle or  
1002 DAPT, acquired at 48 hpi by LSM. (i) Quantification of ventricular cardiomyocyte  
1003 number in uninjured and injured *Tg(myI7:h2b-GFP)* larvae at 48 hpi treated with  
1004 vehicle or DAPT, n=24-40. \*\* $p \leq 0.01$ , \*\*\*\* $p \leq 0.0001$  Unpaired t test. (j) Representative  
1005 images of injured *Tg(myI7:nlsDsRed)* larvae treated with vehicle or AG1478, acquired  
1006 at 48 hpi by LSM. (k) Quantification of ventricular cardiomyocyte number in uninjured  
1007 and injured *Tg(myI7:h2b-GFP)* larvae at 48 hpi treated with vehicle or AG1478, n=24.  
1008 All images are maximum intensity projections of 3D LSM stacks. \*\* $p \leq 0.01$ ,  
1009 \*\*\*\* $p \leq 0.0001$  Unpaired t test. Scale bars = 50  $\mu\text{m}$ .

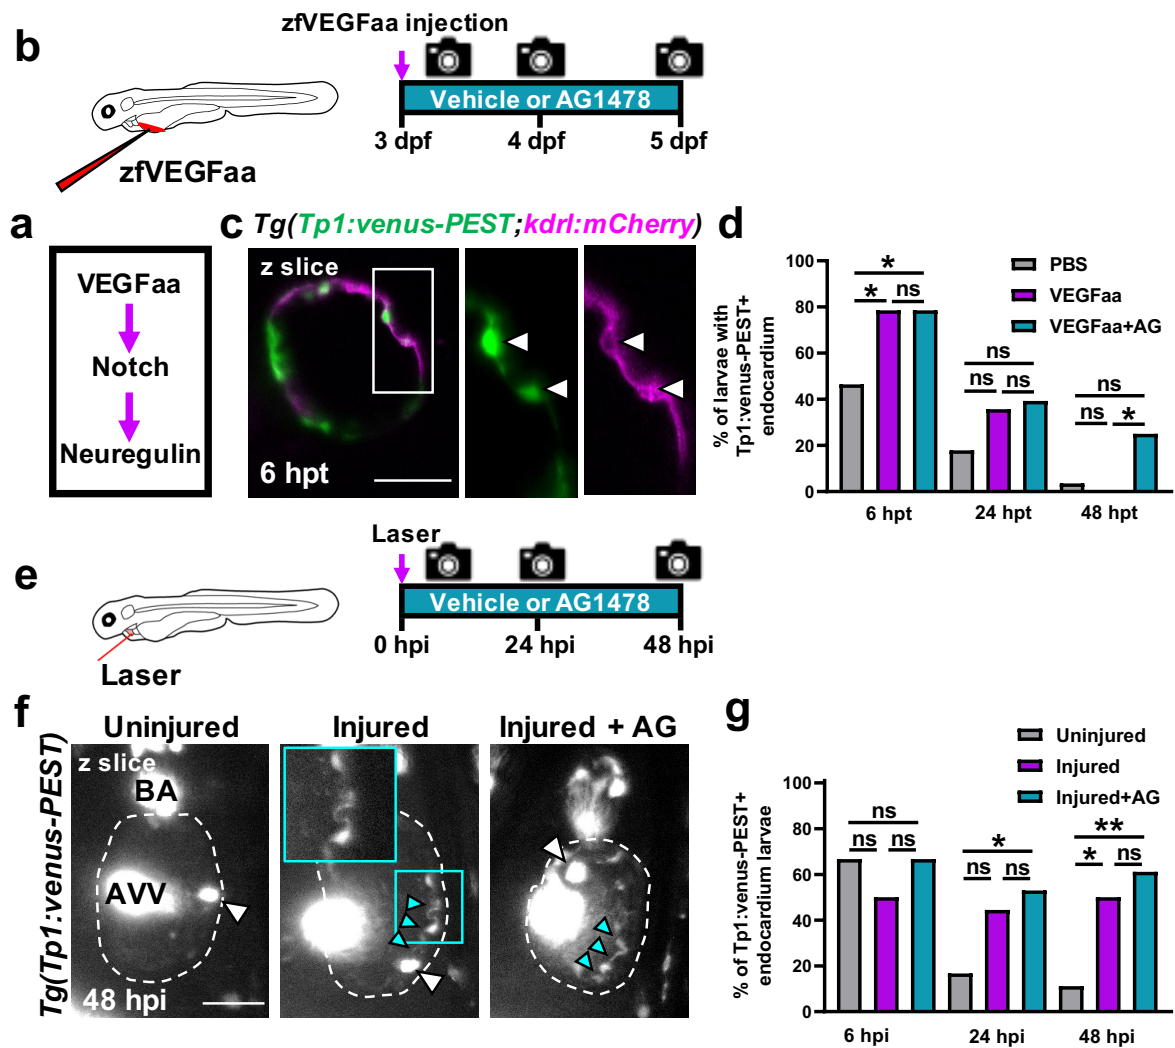

1010

1011 **Figure 8: VEGFaa drives cardiomyocyte proliferation by endocardial notch**  
 1012 **signalling.**

1013 (a) Hypothesised signalling pathway active in uninjured and injured larval hearts  
 1014 driving cardiomyocyte proliferation. (b) Schematic illustrating the treatment strategy for  
 1015 the injection of uninjured larvae with zfVEGFaa and continuous bathing in AG1478  
 1016 solution. (c) Representative LSFM-acquired z plane showing notch expression  
 1017 colocalising with endocardium in *Tg(Tp1:venus-PEST;kdrl:hsa.HRAS-mCherry)*,  
 1018 abbreviated in the figure to *Tg(Tp1:venus-PEST;kdrl:mCherry)*. AG1478 abbreviated  
 1019 to AG, white box = zoom panel. (d) Quantification of the proportion of larvae with  
 1020 notch+ endocardium at 6, 24, and 48 hpt following zfVEGFaa injection and bathing in  
 1021 AG1478, n=28. \* $p \leq 0.05$  Fisher's exact test. (e) Schematic illustrating the treatment  
 1022 strategy for the lasering of larvae and continuous bathing in AG1478 solution. (f)  
 1023 Representative z plane images of uninjured, injured and injured AG-treated ventricles  
 1024 from *Tg(tp1:venus-PEST)* larvae acquired by light-sheet microscopy at 48 hpi. BA =



1025 bulbous arteriosus; AVV = atrioventricular valve; white arrowheads =laterally inhibited  
1026 cardiomyocytes, cyan arrowheads = notch+ endocardium; cyan box = zoom panel. (g)  
1027 Quantification of the proportion of larvae with notch+ endocardium at 6, 24, and 48 hpt  
1028 following laser injury and bathing in AG1478, n=18. All images are maximum intensity  
1029 projections of 3D LSFM stacks unless otherwise stated. \* $p \leq 0.05$ , \*\* $p \leq 0.01$  Fisher's  
1030 exact test. Scale bars = 50  $\mu\text{m}$ .

1031

1032 **Supplementary figures**

1033

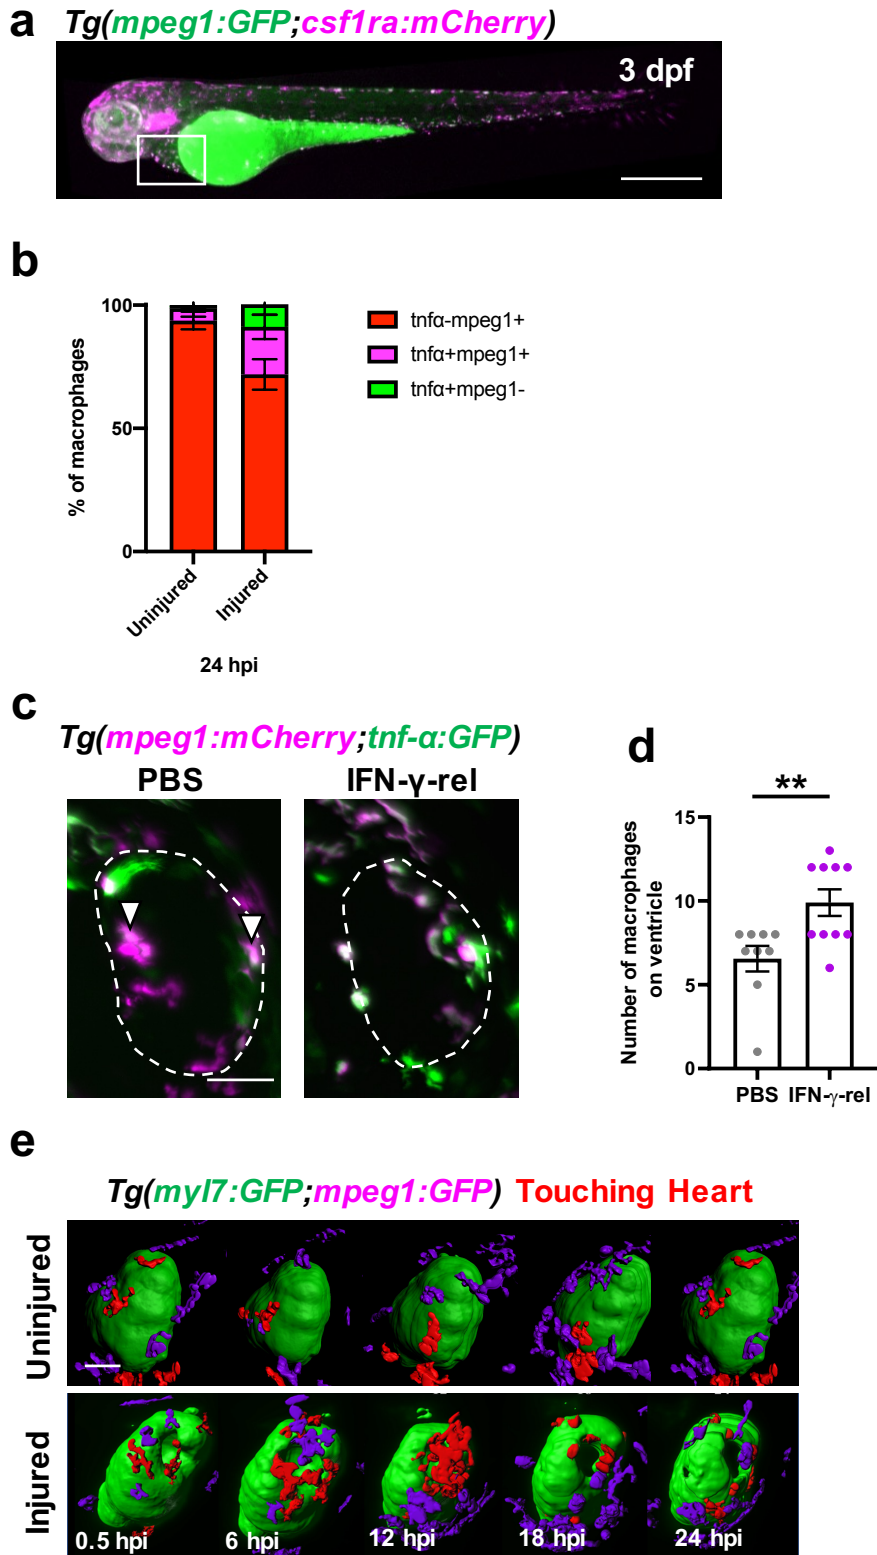

1034

1035

1036

1037

1038

**Supplementary figure 1: Cardiac macrophage phenotype in larval zebrafish is plastic and can be polarised to tnfa+ by IFN-γ-rel.**

(a) Representative epifluorescence image of a 3 dpf *Tg(mpeg1:GFP;csf1ra:NfsB-mCherry)* abbreviated to *Tg(mpeg1:GFP;csf1ra:mCherry)* in the figure, showing an

1039 anterior-posterior polarity in macrophage expression of *csf1ra* (higher proportion of  
1040 anterior macrophages were *csf1ra*<sup>+</sup>). White box = indicated pericardial area. Scale bar  
1041 = 500 $\mu$ m. (b) Quantification of the proportion of macrophages that are *tnfa*-*mpeg1*<sup>+</sup>,  
1042 *tnfa*+*mpeg1*<sup>+</sup> and *tnfa*+*mpeg1*<sup>-</sup> on hearts in uninjured and injured larvae at 24 hpi. (c)  
1043 Representative images of hearts from *Tg(mpeg1:mCherry;tnfa:GFP)* larvae at 24 hpi  
1044 injected with PBS or IFN- $\gamma$ -rel. White dashed line = outline of the ventricle; and white  
1045 arrowheads = *tnfa*+*mpeg1*<sup>+</sup> macrophages. Scale bar = 50 $\mu$ m. (d) Quantification of the  
1046 number of macrophages on the injured ventricle at 24 hpi after injection at 0 hpi with  
1047 PBS or IFN- $\gamma$ -rel. (e) Time-lapse timepoints of *Tg(myI7:GFP;mpeg1:mCherry)* hearts  
1048 acquired by heartbeat-synchronised LSM, surface rendered and colour-coded to  
1049 show myocardium in green, macrophages on the heart in red and macrophages  
1050 elsewhere in purple. Macrophages can be seen to change from stellate to rounded  
1051 over time following injury. Scale bar = 50 $\mu$ m.  
1052

**a** *Tg(myI7:mKateCAAX;myI7:h2b-GFP)*

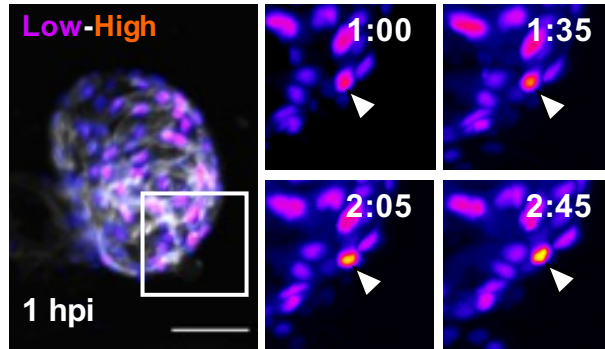

**b** *Tg(mpeg1:GFP;myI7:h2b-GFP;myI7:mKateCAAX) PI*

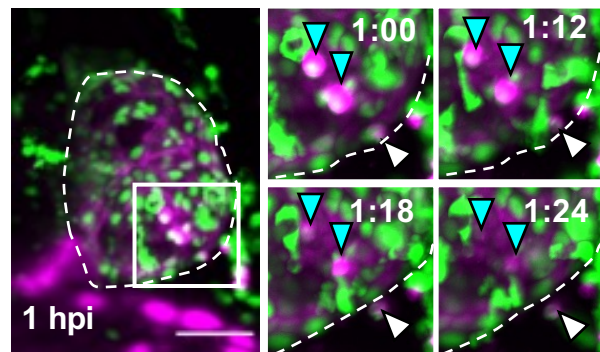

**c** *Tg(myI7:GFP;mpeg1:mCherry)*

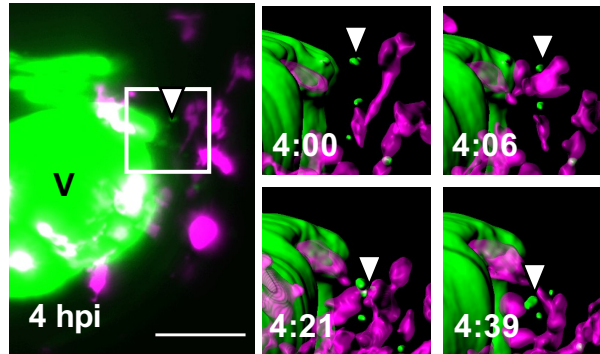

**d** *Tg(myI7:mKateCAAX;myI7:h2b-GFP)*

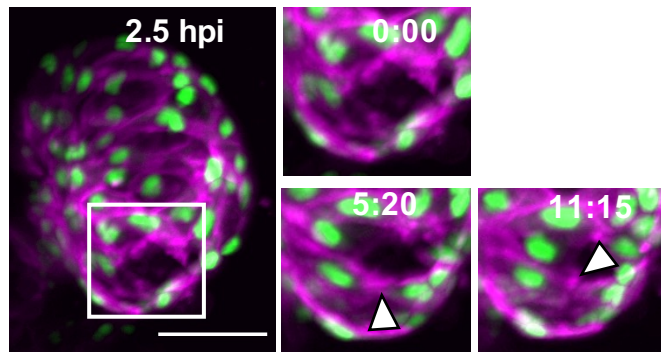

1054 **Supplementary figure 2: Heartbeat-synchronised lightsheet-acquired time-lapse**  
1055 **stills**

1056 (a) Time-lapse stills of injured *Tg(myI7:h2b-GFP;myI7:mKateCAAX)* ventricles  
1057 imaged from 1 hpi. GFP intensity show by heat LUT, white arrowhead = apoptotic  
1058 cardiomyocyte/condensing nucleus, white box = zoom panel. (b) Time-lapse stills of  
1059 injured *Tg(myI7:h2b-GFP;myI7:mKateCAAX;mpeg1:GFP)* ventricles imaged from 1  
1060 hpi by heart-synchronised light-sheet imaging. Round GFP<sup>low</sup> = cardiomyocyte nuclei  
1061 and stellate GFP<sup>high</sup> =macrophages. Cyan arrowheads = Necrotic cardiomyocyte  
1062 nuclei and white arrowheads = expelled necrotic cardiomyocyte, white box = zoom  
1063 panel. (c) Time-lapse stills of an injured *Tg(myI7:GFP;mpeg1:mCherry)* ventricle from  
1064 4 hpi where the full size panel has high gain in the GFP channel to highlight GFP<sup>low</sup>  
1065 myocardial debris and zoom panels (area indicated by white box) are surface rendered  
1066 to highlight removal of myocardium (green) by macrophages (magenta). V = high gain  
1067 ventricle, white arrowhead = myocardial debris. (d) Time-lapse stills of an injured  
1068 *Tg(myI7:mKateCAAX;myI7:h2b-GFP)* ventricle from 2.5 hpi. White box = zoom panel,  
1069 white arrowheads = cell-cell junctions

1070

## Model 1: Macrophage ablation

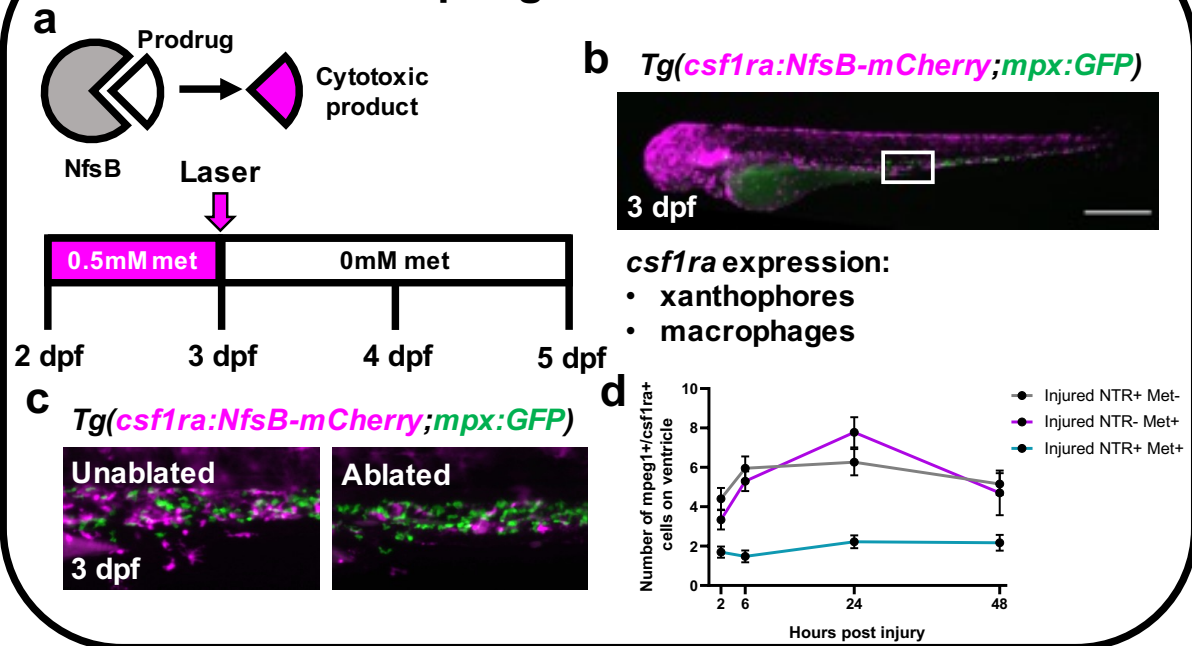

## Model 2: Macrophage null mutant

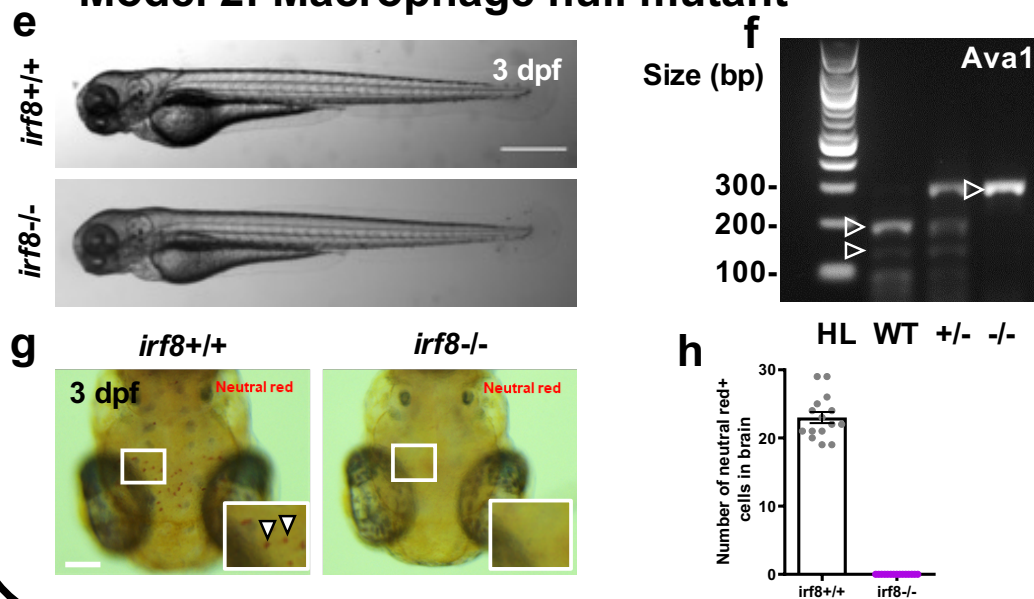

1071

1072

1073 **Supplementary figure 3: Macrophages can be pharmacologically ablated or**  
 1074 **developmentally blocked genetically.**

1075 (a) Schematic illustrating how nitroreductase enzyme ‘NfsB’ catabolises prodrug  
 1076 ‘metronidazole’ to form a cytotoxic biproduct. (b) Representative epifluorescence  
 1077 image of a *Tg(csf1ra:NfsB-mCherry;mpx:GFP)* 3 dpf larva (abbreviated to  
 1078 *Tg(csf1ra:mCherry;mpx:GFP)* in all panels), white box = caudal haematopoietic tissue,

1079 magenta = macrophages and green = neutrophils (CHT) (c) Representative images of  
 1080 ablated and unablated macrophages in the CHT, size and location indicated in (b)) in  
 1081 *Tg(csf1ra:mCherry;mpx:GFP)* 3dpf larvae. Macrophages are ablated and only  
 1082 apoptotic bodies remain but not neutrophils are unaffected. (d) Quantification of  
 1083 macrophages at standard timepoints, marked by either *mpeg1* or *csf1a* on the injured  
 1084 ventricle in each of the NTR=metronidazole ablation model's treatment groups  
 1085 NTR+Met-, NTR-Met+ and NTR+Met+. Macrophage ablation can be seen to abolish  
 1086 the macrophage response (e) Representative brightfield images of *irf8*<sup>+/+</sup> and *irf8*<sup>-/-</sup>  
 1087 larvae at 3 dpf. (f) Representative 1% agarose gel displaying *Ava1* restriction digest  
 1088 band pattern for WT, *irf8* heterozygous and homozygous mutants. (g) Representative  
 1089 dorsal view brightfield image of 3 dpf larval heads stained with neutral red vital dye  
 1090 with white zoom panel highlighting stained macrophages (microglia) (red) in *irf8*<sup>+/+</sup> but  
 1091 not *irf8*<sup>-/-</sup> larvae. (h) Quantification of the number of neutral red positive stained cells  
 1092 (macrophages/microglia) in larval brains of *irf8*<sup>+/+</sup> and *irf8*<sup>-/-</sup> at 3 dpf showing *irf8*<sup>-/-</sup>  
 1093 larvae to be macrophage-null. Scale bar = 500μm (b & e), 100μm (g).

1094  
1095

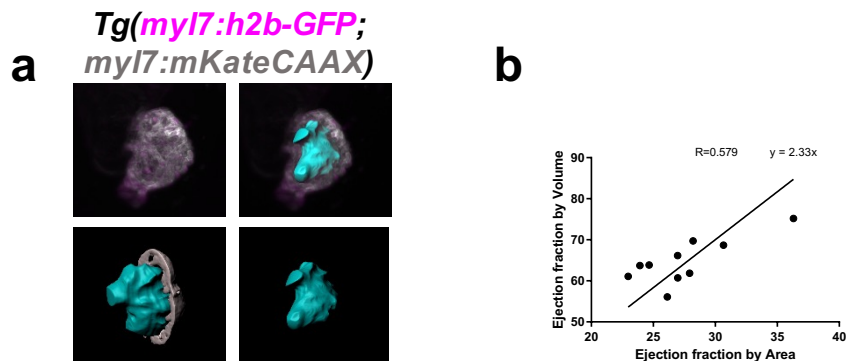

1096  
1097

1098 **Supplementary figure 4: Ejection fraction by area is proportional to ejection**  
 1099 **fraction by volume.**

1100 (a) Representative IMARIS-generated image showing a rendered ventricular  
 1101 myocardium (grey render), rendered chamber volume (cyan) and MIP of 3D heartbeat-  
 1102 synchronised LSFM scan of a 3 dpf heart (ventricle) in diastole. Image acquired from  
 1103 a *Tg(myI7:h2b-GFP;myI7:mKateCAAX)* larva. (b) Quantification of ejection fraction by  
 1104 area (calculated from diastolic and systolic lateral brightfield images) and by volume

1105 (calculated from surface renders of luminal volumes in diastole and systole) for n=10  
 1106 fish.  
 1107

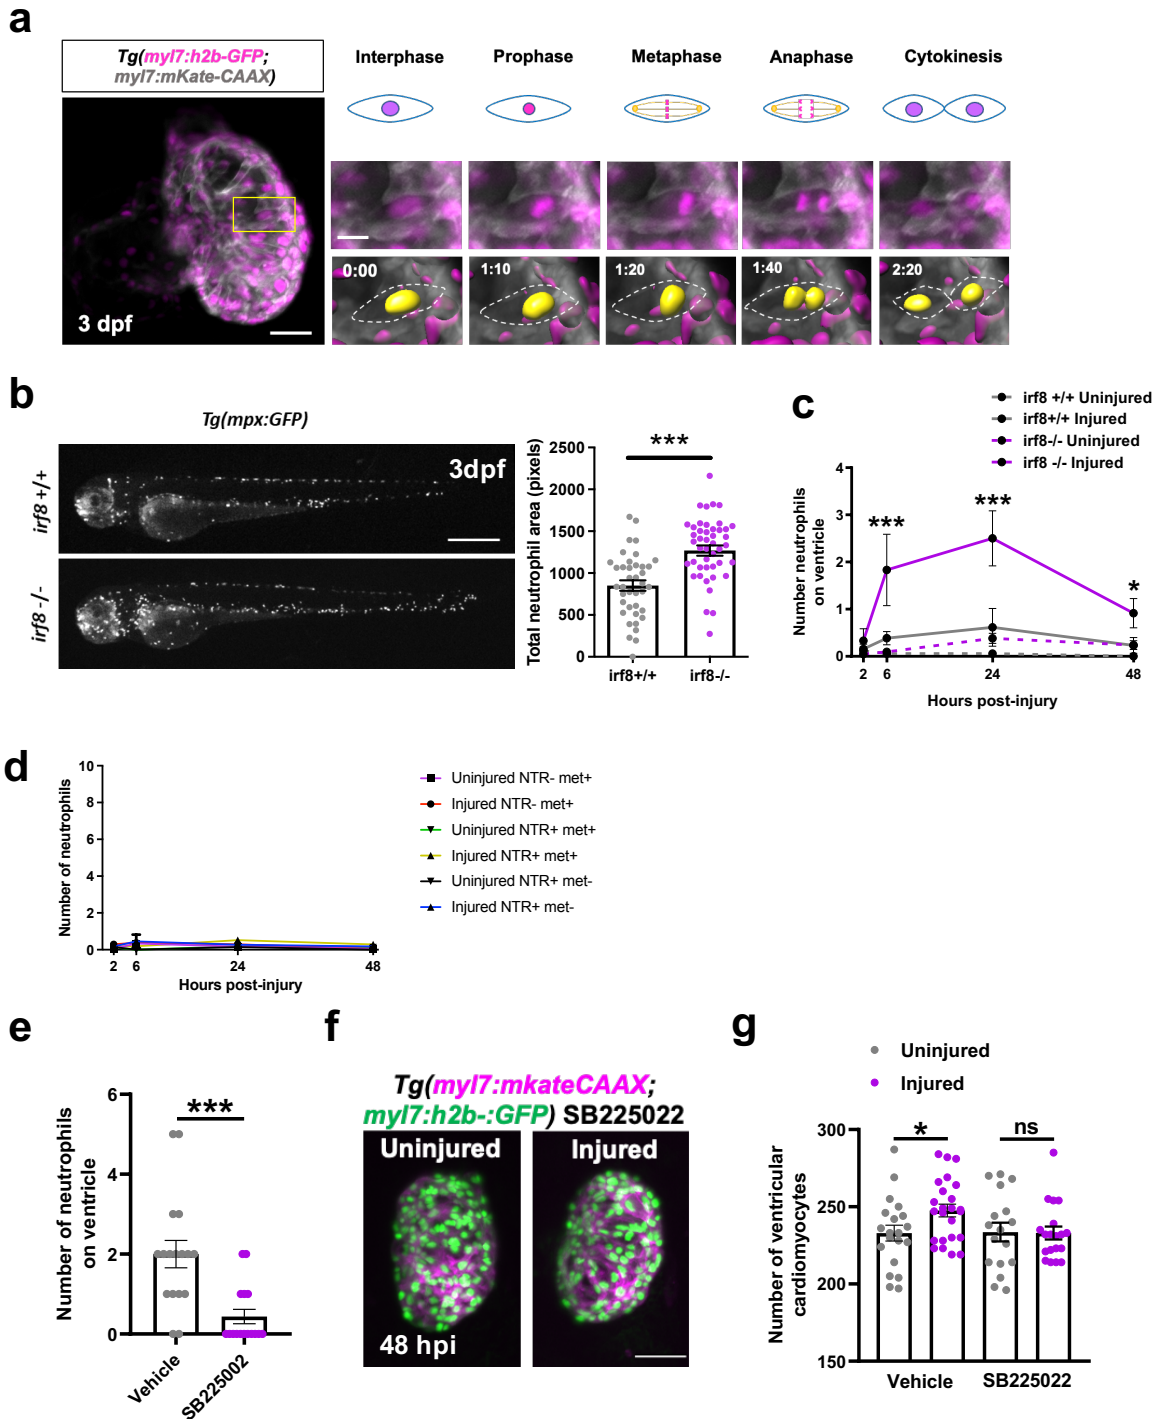

1108  
 1109 **Supplementary figure 5: *irf8*<sup>-/-</sup> larvae have a larger neutrophil response to**  
 1110 **cardiac injury than *irf8*<sup>+/+</sup>.**

1111 (a) Representative timepoint images from heartbeat-synchronised LSFM time-lapse  
 1112 of a laser-injured 3 dpf *Tg(myI7:h2b-GFP;myI7:mKateCAAX)* larva showing an



1113 example of each phase of complete cell division of a single cardiomyocyte, typical of  
1114 larval hearts. Yellow box = zoom panel; left scale bar = 30  $\mu\text{m}$ ; right scale bar = 10  
1115  $\mu\text{m}$ . Timestamps post-injury indicated in figure. (b) Representative whole larva  
1116 epifluorescence image of *irf8*<sup>-/-</sup> and *irf8*<sup>+/+</sup> *Tg(mpx:GFP)* larvae showing *irf8*<sup>-/-</sup> to have  
1117 greater global neutrophil numbers (scale bar = 500  $\mu\text{m}$ ), quantified in the graph (right).  
1118 \*\*\* $p \leq 0.001$ . t test, n=39-46. (c) Quantification of neutrophil numbers at the ventricle in  
1119 uninjured and injured *irf8*<sup>+/+</sup> and *irf8*<sup>-/-</sup> larvae at the standard laser-injury model  
1120 timepoints, showing *irf8*<sup>-/-</sup> larvae to have a significantly greater neutrophil response.  
1121 n=17-25. (d) Quantification of neutrophil numbers at the ventricle in uninjured and  
1122 injured NTR-met<sup>+</sup>, NTR+met<sup>+</sup> and NTR+met<sup>-</sup> larvae at the standard laser-injury  
1123 model timepoints. All metronidazole-nitroreductase treatment groups to have a  
1124 minimal neutrophil response and therefore no neutrophil compensation in the  
1125 macrophage ablated group NTR+met<sup>+</sup>, n=17-24. (e) Quantification of the number of  
1126 recruited neutrophils at the injured ventricle in at 24 hpi in *Tg(myI7:h2b-*  
1127 *GFP;myI7:mKateCAAX)* larvae bathed in vehicle or SB225002 from -2 to +24 hpi  
1128 showing SB225002 to significantly reduce neutrophil number, n=17. (f) Representative  
1129 light-sheet acquired images of uninjured and injured *irf8*<sup>-/-</sup> *Tg(myI7:h2b-*  
1130 *GFP;myI7:mKateCAAX)* ventricles at 48 hpi following treatment with SB225002 from  
1131 -2 to +24 hpi, scale bar = 50  $\mu\text{m}$ . (g) Quantification of ventricular cardiomyocyte  
1132 number in uninjured and injured *irf8*<sup>-/-</sup> *Tg(myI7:h2b-GFP;myI7:mKateCAAX)* ventricles  
1133 at 48 hpi following treatment with vehicle or SB225002 -2 to 24 hpi, n=17-20, \* $p \leq 0.05$   
1134 t test  
1135

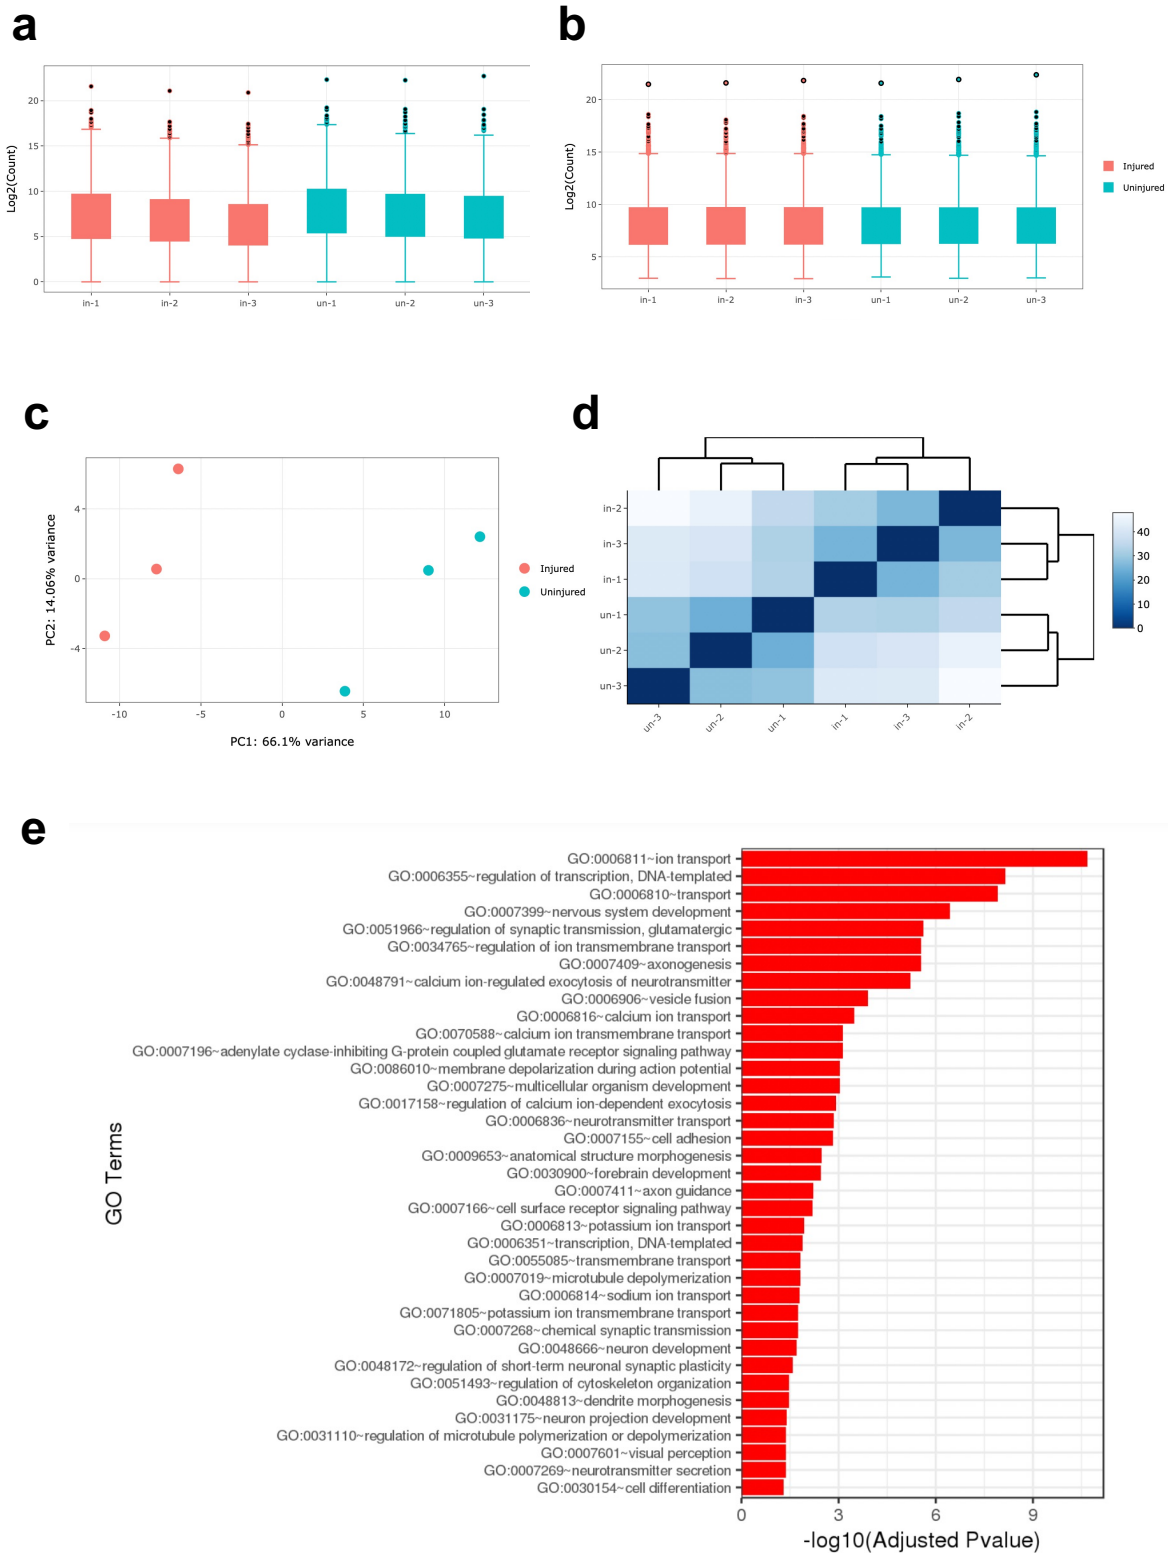

1136

1137 **Supplementary figure 6: Bulk RNAseq analysis of uninjured and injured larval**  
 1138 **hearts**

1139 (a) Box plot illustrating the distribution of reads before (a) and after normalisation (b)

1140 Principal component analysis of samples, illustrating relative intragroup sample

1141 similarity. (c) Distance matrix illustrating pairwise sample similarity. (e) Plot showing  
 1142 gene ontology terms that were significantly enriched by Fishers exact test for  
 1143 significantly ( $p_{adj} < 0.05$ ) differentially expressed genes between uninjured and injured  
 1144 hearts at 48 hpi.  
 1145

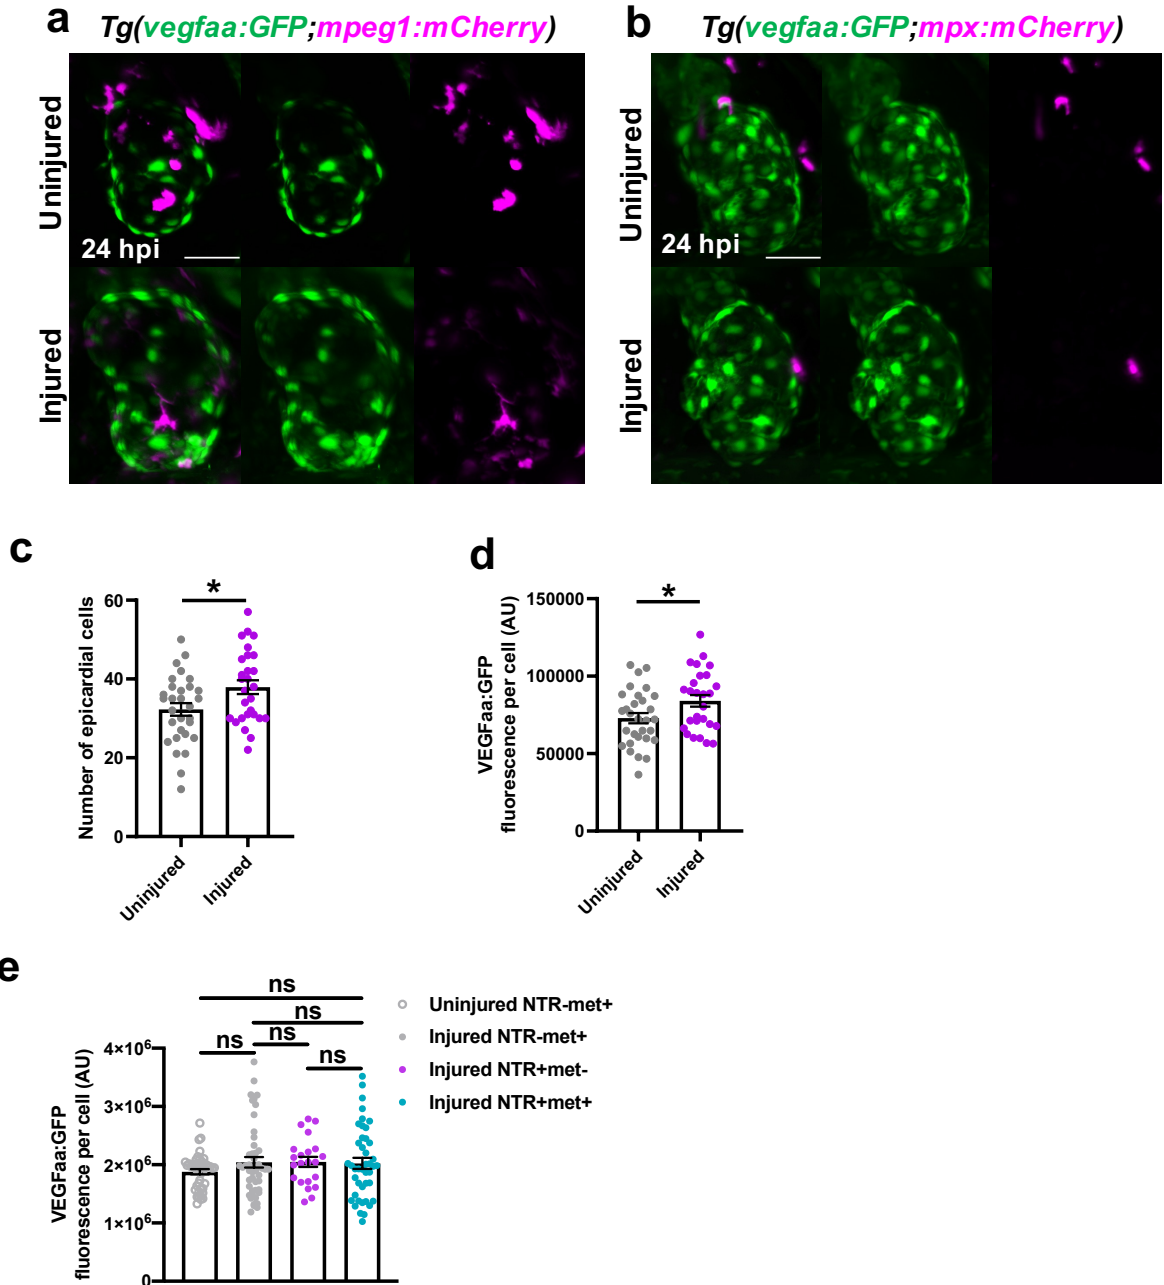

1146  
 1147 **Supplementary figure 7: *vegfaa:GFP* expression does not colocalize with**  
 1148 **macrophages or neutrophils following larval heart injury.**  
 1149 (a) Representative LSFM image of an injured *Tg(vegfaa:GFP;mpeg1:mCherry)* heart  
 1150 24 hpi showing *vegfaa:GFP* expression only in the epicardium and not in

1151 macrophages, scale bar = 100 $\mu$ m. (b) Representative LSM image of an injured  
1152 *Tg(vegfaa:GFP;mpx:mCherry)* heart 24 hpi showing VEGFaa expression only in the  
1153 epicardium and not in neutrophils, scale bar = 100 $\mu$ m. (c) Quantification of the number  
1154 of epicardial cells, as marked by vegfaa:GFP, on injured ventricles at 48 hpi in  
1155 uninjured and injured larvae, n=30. \* $p \leq 0.05$  t test (d) Quantification of the average  
1156 vegfaa:GFP expression of epicardial cells per cell, on injured ventricles at 48 hpi in  
1157 uninjured and injured larvae, n=30. \* $p \leq 0.05$  t test (e) Quantification of average  
1158 vegfaa:GFP fluorescence per cell in metronidazole-nitroreductase ablation model  
1159 groups at 48 hpi, n=22-44. One-way ANOVA followed by Holm-Sidak's multiple  
1160 comparisons Post-hoc test.

1161

1162

## 1163 **References**

1164

- 1165 1. Ohnmacht, J., Yang, Y., Maurer, G. W., Barreiro-Iglesias, A., Tsarouchas, T.  
1166 M., Wehner, D., Sieger, D., Becker, C. G. & Becker, T. Spinal motor neurons  
1167 are regenerated after mechanical lesion and genetic ablation in larval  
1168 zebrafish. *Dev.* **143**, 1464–1474 (2016).
- 1169 2. Becker, C. G., Lieberoth, B. C., Morellini, F., Feldner, J., Becker, T. &  
1170 Schachner, M. L1.1 is involved in spinal cord regeneration in adult zebrafish. *J.*  
1171 *Neurosci.* **24**, 7837–7842 (2004).
- 1172 3. Bensimon-Brito, A., Ramkumar, S., Boezio, G. L. M., Guenther, S., Kuenne,  
1173 C., Helker, C. S. M., Sánchez-Iranzo, H., Iloska, D., Piesker, J., Pullamsetti, S.,  
1174 Mercader, N., Beis, D. & Stainier, D. Y. R. TGF- $\beta$  Signaling Promotes Tissue  
1175 Formation during Cardiac Valve Regeneration in Adult Zebrafish. *Dev. Cell* **0**,  
1176 (2019).
- 1177 4. Sander, V., Davidson, A. J., Sander, V. & Davidson, A. J. Kidney Injury and  
1178 Regeneration in Zebrafish. *Semin. Nephrol.* **34**, 437–444 (2014).
- 1179 5. Basu Mallik, S., Jayashree, B. S. & Shenoy, R. R. Epigenetic modulation of  
1180 macrophage polarization- perspectives in diabetic wounds. *J. Diabetes*  
1181 *Complications* **0**, (2018).
- 1182 6. González-Rosa, J. M., Martín, V., Peralta, M., Torres, M. & Mercader, N.  
1183 Extensive scar formation and regression during heart regeneration after  
1184 cryoinjury in zebrafish. *Development* **138**, 1663–1674 (2011).

- 1185 7. Leuschner, F., Rauch, P. J., Ueno, T., Gorbатов, R., Marinelli, B., Lee, W. W.,  
1186 Dutta, P., Wei, Y., Robbins, C., Iwamoto, Y., Sena, B., Chudnovskiy, A.,  
1187 Panizzi, P., Keliher, E., Higgins, J. M., Libby, P., Moskowitz, M. A., Pittet, M. J.,  
1188 Swirski, F. K., Weissleder, R. & Nahrendorf, M. Rapid monocyte kinetics in  
1189 acute myocardial infarction are sustained by extramedullary monocytopoiesis.  
1190 *J. Exp. Med.* **209**, 123–37 (2012).
- 1191 8. Murry, C. E., Reinecke, H. & Pabon, L. M. Regeneration Gaps. Observations  
1192 on Stem Cells and Cardiac Repair. *Journal of the American College of*  
1193 *Cardiology* vol. 47 1777–1785 (2006).
- 1194 9. Bergmann, O., Zdunek, S., Felker, A., Salehpour, M., Alkass, K., Bernard, S.,  
1195 Sjostrom, S. L., Szewczykowska, M., Jackowska, T., dos Remedios, C., Malm,  
1196 T., Andrä, M., Jashari, R., Nyengaard, J. R., Possnert, G., Jovinge, S., Druid,  
1197 H. & Frisé, J. Dynamics of Cell Generation and Turnover in the Human Heart.  
1198 *Cell* **161**, 1566–1575 (2015).
- 1199 10. Pfeffer, M. A. & Braunwald, E. Ventricular remodeling after myocardial  
1200 infarction. Experimental observations and clinical implications. *Circulation* **81**,  
1201 1161–72 (1990).
- 1202 11. Richardson, W. J., Clarke, S. A., Quinn, T. A. & Holmes, J. W. Physiological  
1203 Implications of Myocardial Scar Structure. *Compr. Physiol.* **5**, 1877–909  
1204 (2015).
- 1205 12. Jopling, C., Sleep, E., Raya, M., Martí, M., Raya, A. & Belmonte, J. C. I.  
1206 Zebrafish heart regeneration occurs by cardiomyocyte dedifferentiation and  
1207 proliferation. *Nature* **464**, 606–609 (2010).
- 1208 13. Kikuchi, K., Holdway, J. E., Werdich, A. A., Anderson, R. M., Fang, Y.,  
1209 Egnaczyk, G. F., Evans, T., MacRae, C. A., Stainier, D. Y. R. & Poss, K. D.  
1210 Primary contribution to zebrafish heart regeneration by gata4+  
1211 cardiomyocytes. *Nature* **464**, 601–605 (2010).
- 1212 14. González-rosa, J. M., Martín, V., Peralta, M., Torres, M. & Mercader, N.  
1213 Extensive scar formation and regression during heart regeneration after  
1214 cryoinjury in zebrafish. **1674**, 1663–1674 (2011).
- 1215 15. Aurora, A. B., Porrello, E. R., Tan, W., Mahmoud, A. I., Hill, J. A., Bassel-duby,  
1216 R., Sadek, H. A. & Olson, E. N. Macrophages are required for neonatal heart  
1217 regeneration. **124**, (2014).
- 1218 16. Godwin, J. W., Debuque, R., Salimova, E. & Rosenthal, N. A. Heart

- 1219 regeneration in the salamander relies on macrophage-mediated control of  
1220 fibroblast activation and the extracellular landscape. *npj Regen. Med.* **2**, 22  
1221 (2017).
- 1222 17. Lai, S.-L., Marín-Juez, R., Moura, P. L., Kuenne, C., Lai, J. K. H., Tsedeke, A.  
1223 T., Guenther, S., Looso, M. & Stainier, D. Y. Reciprocal analyses in zebrafish  
1224 and medaka reveal that harnessing the immune response promotes cardiac  
1225 regeneration. *Elife* **6**, (2017).
- 1226 18. Tsarouchas, T. M., Wehner, D., Cavone, L., Munir, T., Keatinge, M.,  
1227 Lambertus, M., Underhill, A., Barrett, T., Kassapis, E., Ogryzko, N., Feng, Y.,  
1228 van Ham, T. J., Becker, T. & Becker, C. G. Dynamic control of proinflammatory  
1229 cytokines Il-1 $\beta$  and Tnf- $\alpha$  by macrophages in zebrafish spinal cord  
1230 regeneration. *Nat. Commun.* **9**, 4670 (2018).
- 1231 19. Nahrendorf, M., Swirski, F. K., Aikawa, E., Stangenberg, L., Wurdinger, T.,  
1232 Figueiredo, J.-L., Libby, P., Weissleder, R. & Pittet, M. J. The healing  
1233 myocardium sequentially mobilizes two monocyte subsets with divergent and  
1234 complementary functions. *J. Exp. Med.* **204**, 3037–3047 (2007).
- 1235 20. Sager, H. B., Hulsmans, M., Lavine, K. J., Moreira, M. B., Heidt, T., Courties,  
1236 G., Sun, Y., Iwamoto, Y., Tricot, B., Khan, O. F., Dahlman, J. E., Borodovsky,  
1237 A., Fitzgerald, K., Anderson, D. G., Weissleder, R., Libby, P., Swirski, F. K. &  
1238 Nahrendorf, M. Proliferation and Recruitment Contribute to Myocardial  
1239 Macrophage Expansion in Chronic Heart Failure. *Circ. Res.* **119**, 853–64  
1240 (2016).
- 1241 21. Nahrendorf, M. & Swirski, F. K. Monocyte and Macrophage Heterogeneity in  
1242 the Heart. **02114**, 1624–1634 (2013).
- 1243 22. Lavin, Y., Winter, D., Blecher-Gonen, R., David, E., Keren-Shaul, H., Merad,  
1244 M., Jung, S. & Amit, I. Tissue-Resident Macrophage Enhancer Landscapes  
1245 Are Shaped by the Local Microenvironment. *Cell* **159**, 1312–1326 (2014).
- 1246 23. Sanz-Morejón, A., García-Redondo, A. B., Reuter, H., Marques, I. J., Bates,  
1247 T., Galardi-Castilla, M., Große, A., Manig, S., Langa, X., Ernst, A., Piragyte, I.,  
1248 Botos, M.-A., González-Rosa, J. M., Ruiz-Ortega, M., Briones, A. M., Salaices,  
1249 M., Englert, C. & Mercader, N. Wilms Tumor 1b Expression Defines a Pro-  
1250 regenerative Macrophage Subtype and Is Required for Organ Regeneration in  
1251 the Zebrafish. *Cell Rep.* **28**, 1296-1306.e6 (2019).
- 1252 24. Nguyen-Chi, M., B'eryl Laplace-Builhe, Travnickova, J., Luz-crawford, P.,

- 1253 Tejedor, G., Phan, Q. T., Duroux-richard, I., Levraud, J., Kissa, K., Lutfalla, G.,  
1254 Jorgensen, C., Djouad, F., Laplace-Builhe, B., Travnickova, J., Luz-crawford,  
1255 P., Tejedor, G., Phan, Q. T., Duroux-richard, I., Levraud, J., Kissa, K., Lutfalla,  
1256 G., Jorgensen, C. & Djouad, F. Identification of polarized macrophage subsets  
1257 in zebrafish. *Elife* **4**, 1–14 (2015).
- 1258 25. Matrone, G., Taylor, J., Wilson, K., ... J. B.-I. journal of & 2013, undefined.  
1259 Laser-targeted ablation of the zebrafish embryonic ventricle: a novel model of  
1260 cardiac injury and repair. *Elsevier*.
- 1261 26. Kaveh, A., Bruton, F. A., Buckley, C., Oremek, M. E. M., Tucker, C. S., Mullins,  
1262 J. J., Taylor, J. M., Rossi, A. G. & Denvir, M. A. Live Imaging of Heart Injury in  
1263 Larval Zebrafish Reveals a Multi-Stage Model of Neutrophil and Macrophage  
1264 Migration. *Front. Cell Dev. Biol.* **8**, 579943 (2020).
- 1265 27. Shiau, C. E., Kaufman, Z., Meireles, A. M. & Talbot, W. S. Differential  
1266 Requirement for *irf8* in Formation of Embryonic and Adult Macrophages in  
1267 Zebrafish. *PLoS One* **10**, 1–15 (2015).
- 1268 28. Hume, D. A., Wollscheid-Lengeling, E., Rojo, R. & Pridans, C. The evolution of  
1269 the macrophage-specific enhancer (Fms intronic regulatory element) within the  
1270 CSF1R locus of vertebrates. *Sci. Rep.* **7**, 1–10 (2017).
- 1271 29. Bevan, L., Lim, Z. W., Venkatesh, B., Riley, P. R., Martin, P. & Richardson, R.  
1272 J. Specific macrophage populations promote both cardiac scar deposition and  
1273 subsequent resolution in adult zebrafish. *Cardiovasc. Res.* (2019)  
1274 doi:10.1093/cvr/cvz221.
- 1275 30. Taylor, J. M., Nelson, C. J., Bruton, F. A., Baghbadrani, A. K., Buckley, C.,  
1276 Tucker, C. S., Rossi, A. G., Mullins, J. J. & Denvir, M. A. Adaptive prospective  
1277 optical gating enables day-long 3D time-lapse imaging of the beating  
1278 embryonic zebrafish heart. *Nat. Commun.* **10**, 1–15 (2019).
- 1279 31. Krijnen, P. A. J., Nijmeijer, R., Meijer, C. J. L. M., Visser, C. A., Hack, C. E. &  
1280 Niessen, H. W. M. Apoptosis in myocardial ischaemia and infarction. *J. Clin.*  
1281 *Pathol.* **55**, 801–11 (2002).
- 1282 32. Pisharath, H., Rhee, J. M., Swanson, M. A., Leach, S. D. & Parsons, M. J.  
1283 Targeted ablation of beta cells in the embryonic zebrafish pancreas using *E.*  
1284 *coli* nitroreductase. *Mech. Dev.* **124**, 218–229 (2007).
- 1285 33. Karra, R., Foglia, M. J., Choi, W.-Y., Belliveau, C., DeBenedittis, P. & Poss, K.  
1286 D. Vegfaa instructs cardiac muscle hyperplasia in adult zebrafish. *Proc. Natl.*

- 1287 *Acad. Sci. U. S. A.* 201722594 (2018) doi:10.1073/pnas.1722594115.
- 1288 34. Chimote, G., Sreenivasan, J., Pawar, N., Subramanian, J., Sivaramakrishnan,  
1289 H. & Sharma, S. Comparison of effects of anti-angiogenic agents in the  
1290 zebrafish efficacy-toxicity model for translational anti-angiogenic drug  
1291 discovery. *Drug Des. Devel. Ther.* **8**, 1107–1123 (2014).
- 1292 35. Gemberling, M., Karra, R., Dickson, A. L. & Poss, K. D. Nrg1 is an injury-  
1293 induced cardiomyocyte mitogen for the endogenous heart regeneration  
1294 program in zebrafish. 1–17 (2015) doi:10.7554/eLife.05871.
- 1295 36. Honkoop, H., Bakker, D. E. de, Aharonov, A., Kruse, F., Shakked, A., Nguyen,  
1296 P. D., Heus, C. de, Garric, L., Muraro, M. J., Shoffner, A., Tessadori, F.,  
1297 Peterson, J. C., Noort, W., Bertozzi, A., Weidinger, G., Posthuma, G., Grün,  
1298 D., Laarse, W. J. van der, Klumperman, J., Jaspers, R. T., Poss, K. D.,  
1299 Oudenaarden, A. van, Tzahor, E., Bakkers, J., de Bakker, D. E., Aharonov, A.,  
1300 Kruse, F., Shakked, A., Nguyen, P. D., de Heus, C., Garric, L., Muraro, M. J.,  
1301 Shoffner, A., Tessadori, F., Peterson, J. C., Noort, W., Bertozzi, A., Weidinger,  
1302 G., Posthuma, G., Grün, D., van der Laarse, W. J., Klumperman, J., Jaspers,  
1303 R. T., Poss, K. D., van Oudenaarden, A., Tzahor, E. & Bakkers, J. Single-cell  
1304 analysis uncovers that metabolic reprogramming by ErbB2 signaling is  
1305 essential for cardiomyocyte proliferation in the regenerating heart. *Elife* **8**,  
1306 (2019).
- 1307 37. Uribe, V., Ramadass, R., Dogra, D., Rasouli, S. J., Gunawan, F., Nakajima, H.,  
1308 Chiba, A., Reischauer, S., Mochizuki, N. & Stainier, D. Y. R. In vivo analysis of  
1309 cardiomyocyte proliferation during trabeculation. (2018)  
1310 doi:10.1242/dev.164194.
- 1311 38. Zhao, L., Ben-Yair, R., Burns, C. E. & Burns, C. G. Endocardial Notch  
1312 Signaling Promotes Cardiomyocyte Proliferation in the Regenerating Zebrafish  
1313 Heart through Wnt Pathway Antagonism. *Cell Rep.* **26**, 546-554.e5 (2019).
- 1314 39. Dovey, H. F., John, V., Anderson, J. P., Chen, L. Z., De Saint Andrieu, P.,  
1315 Fang, L. Y., Freedman, S. B., Folmer, B., Goldbach, E., Holsztynska, E. J., Hu,  
1316 K. L., Johnson-Wood, K. L., Kennedy, S. L., Kholodenko, D., Knops, J. E.,  
1317 Latimer, L. H., Lee, M., Liao, Z., Lieberburg, I. M., Motter, R. N., Mutter, L. C.,  
1318 Nietz, J., Quinn, K. P., Sacchi, K. L., Seubert, P. A., Shopp, G. M., Thorsett, E.  
1319 D., Tung, J. S., Wu, J., Yang, S., Yin, C. T., Schenk, D. B., May, P. C., Altstiel,  
1320 L. D., Bender, M. H., Boggs, L. N., Britton, T. C., Clemens, J. C., Czilli, D. L.,



- 1321 Dieckman-McGinty, D. K., Droste, J. J., Fuson, K. S., Gitter, B. D., Hyslop, P.  
1322 A., Johnstone, E. M., Li, W. Y., Little, S. P., Mabry, T. E., Miller, F. D., Ni, B.,  
1323 Nissen, J. S., Porter, W. J., Potts, B. D., Reel, J. K., Stephenson, D., Su, Y.,  
1324 Shipley, L. A., Whitesitt, C. A., Yin, T. & Audia, J. E. Functional gamma-  
1325 secretase inhibitors reduce beta-amyloid peptide levels in brain. *J.*  
1326 *Neurochem.* **76**, 173–181 (2001).
- 1327 40. Micchelli, C. A., Esler, W. P., Kimberly, W. T., Jack, C., Berezovska, O.,  
1328 Kornilova, A., Hyman, B. T., Perrimon, N. & Wolfe, M. S. Gamma-  
1329 secretase/presenilin inhibitors for Alzheimer's disease phenocopy Notch  
1330 mutations in *Drosophila*. *FASEB J.* **17**, 79–81 (2003).
- 1331 41. Geling, A., Steiner, H., Willem, M., Bally-Cuif, L. & Haass, C. A  $\gamma$ -secretase  
1332 inhibitor blocks Notch signaling in vivo and causes a severe neurogenic  
1333 phenotype in zebrafish. *EMBO Rep.* **3**, 688–694 (2002).
- 1334 42. Lyons, D. A., Pogoda, H. M., Voas, M. G., Woods, I. G., Diamond, B., Nix, R.,  
1335 Arana, N., Jacobs, J. & Talbot, W. S. *erbb3* and *erbb2* are essential for  
1336 Schwann cell migration and myelination in zebrafish. *Curr. Biol.* **15**, 513–524  
1337 (2005).
- 1338 43. Samsa, L. A., Givens, C., Tzima, E., Stainier, D. Y. R., Qian, L. & Liu, J.  
1339 Cardiac contraction activates endocardial Notch signaling to modulate  
1340 chamber maturation in zebrafish. *Development* **142**, 4080–4091 (2015).
- 1341 44. Gálvez-Santisteban, M., Chen, D., Zhang, R., Serrano, R., Nguyen, C., Zhao,  
1342 L., Nerb, L., Masutani, E. M., Vermot, J., Burns, C. G., Burns, C. E., del Álamo,  
1343 J. C. & Chi, N. C. Hemodynamic-mediated endocardial signaling controls in  
1344 vivo myocardial reprogramming. *Elife* **8**, (2019).
- 1345 45. Kuil, L. E., Oosterhof, N., Ferrero, G., Mikulášová, T., Hason, M., Dekker, J.,  
1346 Rovira, M., van der Linde, H. C., van Strien, P. M. H., de Pater, E., Schaaf, G.,  
1347 Bindels, E. M. J., Wittamer, V. & van Ham, T. J. Zebrafish macrophage  
1348 developmental arrest underlies depletion of microglia and reveals *Csf1r*-  
1349 independent metaphocytes. *Elife* **9**, (2020).
- 1350 46. Lin, X., Zhou, Q., Zhao, C., Lin, G., Xu, J. & Wen, Z. An Ectoderm-Derived  
1351 Myeloid-like Cell Population Functions as Antigen Transporters for Langerhans  
1352 Cells in Zebrafish Epidermis. *Dev. Cell* **49**, 605-617.e5 (2019).
- 1353 47. Koth, J., Wang, X., Killen, A. C., Stockdale, W. T., Potts, H. G., Jefferson, A.,  
1354 Bonkhofer, F., Riley, P. R., Patient, R. K., Göttgens, B. & Mommersteeg, M. T.

- 1355 M. Runx1 promotes scar deposition and inhibits myocardial proliferation and  
1356 survival during zebrafish heart regeneration. *Development* **147**, (2020).
- 1357 48. Herrgen, L., Voss, O. P. & Akerman, C. J. Calcium-Dependent Neuroepithelial  
1358 Contractions Expel Damaged Cells from the Developing Brain. *Dev. Cell* **31**,  
1359 599–613 (2014).
- 1360 49. Leor, J., Palevski, D., Amit, U. & Konfino, T. Seminars in Cell & Developmental  
1361 Biology Macrophages and regeneration : Lessons from the heart. *Semin. Cell*  
1362 *Dev. Biol.* **58**, 26–33 (2016).
- 1363 50. Beisaw, A., Kuenne, C., Günther, S., Dallmann, J., Wu, C.-C., Bentsen, M.,  
1364 Looso, M. & Stainier, D. AP-1 Contributes to Chromatin Accessibility to  
1365 Promote Sarcomere Disassembly and Cardiomyocyte Protrusion during  
1366 Zebrafish Heart Regeneration. *Circ. Res.* CIRCRESAHA.119.316167 (2020)  
1367 doi:10.1161/CIRCRESAHA.119.316167.
- 1368 51. Morikawa, Y., Zhang, M., Heallen, T., Leach, J., Tao, G., Xiao, Y., Bai, Y., Li,  
1369 W., Willerson, J. T. & Martin, J. F. Actin cytoskeletal remodeling with protrusion  
1370 formation is essential for heart regeneration in Hippo-deficient mice. *Sci.*  
1371 *Signal.* **8**, (2015).
- 1372 52. Marín-juez, R., Marass, M., Gauvrit, S., Rossi, A., Lai, S. & Materna, S. C. Fast  
1373 revascularization of the injured area is essential to support zebrafish heart  
1374 regeneration. **113**, (2016).
- 1375 53. Stevens, S. M., von Gise, A., VanDusen, N., Zhou, B. & Pu, W. T. Epicardium  
1376 is required for cardiac seeding by yolk sac macrophages, precursors of  
1377 resident macrophages of the adult heart. *Dev. Biol.* **413**, 153–159 (2016).
- 1378 54. Deniset, J. F., Belke, D., Lee, W.-Y., Weber, G. F., Fedak, P. W. M. & Kubes,  
1379 P. Gata6+ Pericardial Cavity Macrophages Relocate to the Injured Heart and  
1380 Prevent Cardiac Fibrosis. *Immunity* **51**, 131-140.e5 (2019).
- 1381 55. Zhao, L., Ben-Yair, R., Burns, C. E. G. & Burns, C. E. G. Endocardial Notch  
1382 Signaling Promotes Cardiomyocyte Proliferation in the Regenerating Zebrafish  
1383 Heart through Wnt Pathway Antagonism. *Cell Rep.* **26**, 546-554.e5 (2019).
- 1384 56. Zhao, L., Borikova, A. L., Ben-Yair, R., Guner-Ataman, B., MacRae, C. A., Lee,  
1385 R. T., Geoffrey Burns, C. & Burns, C. E. Notch signaling regulates  
1386 cardiomyocyte proliferation during zebrafish heart regeneration. *Proc. Natl.*  
1387 *Acad. Sci. U. S. A.* **111**, 1403–1408 (2014).
- 1388 57. Raya, A., Koth, C. M., Büscher, D., Kawakami, Y., Itoh, T., Raya, R. M.,

- 1389 Sternik, G., Tsai, H.-J., Rodríguez-Esteban, C. & Izpisúa-Belmonte, J. C.  
1390 Activation of Notch signaling pathway precedes heart regeneration in  
1391 zebrafish. *Proc. Natl. Acad. Sci. U. S. A.* **100 Suppl 1**, 11889–95 (2003).
- 1392 58. Zhao, L., Ben-Yair, R., Burns, C. G. E. G. & Burns, C. G. E. G. Endocardial  
1393 Notch Signaling Promotes Cardiomyocyte Proliferation in the Regenerating  
1394 Zebrafish Heart through Wnt Pathway Antagonism. *Cell Rep.* **26**, 546-554.e5  
1395 (2019).
- 1396 59. Gemberling, M., Karra, R., Dickson, A. L. & Poss, K. D. Nrg1 is an injury-  
1397 induced cardiomyocyte mitogen for the endogenous heart regeneration  
1398 program in zebrafish. *Elife* **4**, (2015).
- 1399 60. Huang, C. J., Tu, C. T., Hsiao, C. Der, Hsieh, F. J. & Tsai, H. J. Germ-line  
1400 transmission of a myocardium-specific GFP transgene reveals critical  
1401 regulatory elements in the cardiac myosin light chain 2 promoter of zebrafish.  
1402 *Dev. Dyn.* **228**, 30–40 (2003).
- 1403 61. Yoo, S. K., Deng, Q., Cavnar, P. J., Wu, Y. I., Hahn, K. M. & Huttenlocher, A.  
1404 Differential Regulation of Protrusion and Polarity by PI(3)K during Neutrophil  
1405 Motility in Live Zebrafish. *Dev. Cell* **18**, 226–236 (2010).
- 1406 62. Ellett, F., Pase, L., Hayman, J. W., Andrianopoulos, A. & Lieschke, G. J.  
1407 mpeg1 promoter transgenes direct macrophage-lineage expression in  
1408 zebrafish. *Blood* **117**, e49 (2011).
- 1409 63. Renshaw, S. A., Loynes, C. A., Trushell, D. M. I., Elworthy, S., Ingham, P. W.  
1410 & Whyte, M. K. B. A transgenic zebrafish model of neutrophilic inflammation.  
1411 *Blood* **108**, 3976–3978 (2006).
- 1412 64. Mickoleit, M., Schmid, B., Weber, M., Fahrbach, F. O., Hombach, S.,  
1413 Reischauer, S. & Huisken, J. High-resolution reconstruction of the beating  
1414 zebrafish heart. *Nat. Methods* **11**, 919–922 (2014).
- 1415 65. Lin, Y.-F., Swinburne, I. & Yelon, D. Multiple influences of blood flow on  
1416 cardiomyocyte hypertrophy in the embryonic zebrafish heart. *Dev. Biol.* **362**,  
1417 242–253 (2012).
- 1418 66. Gray, C., Loynes, C. A., Whyte, M. K. B., Crossman, D. C., Renshaw, S. A. &  
1419 Chico, T. J. A. Simultaneous intravital imaging of macrophage and neutrophil  
1420 behaviour during inflammation using a novel transgenic zebrafish. 811–819  
1421 (2011) doi:10.1160/TH10-08-0525.
- 1422 67. Davison, J. M., Akitake, C. M., Goll, M. G., Rhee, J. M., Gosse, N., Baier, H.,

- 1423 Halpern, M. E., Leach, S. D. & Parsons, M. J. Transactivation from Gal4-VP16  
1424 transgenic insertions for tissue-specific cell labeling and ablation in zebrafish.  
1425 *Dev. Biol.* **304**, 811–824 (2007).
- 1426 68. Rottbauer, W., Saurin, A. J., Lickert, H., Shen, X., Burns, C. G., Wo, Z. G.,  
1427 Kemler, R., Kingston, R., Wu, C. & Fishman, M. Reptin and pontin  
1428 antagonistically regulate heart growth in zebrafish embryos. *Cell* **111**, 661–672  
1429 (2002).
- 1430 69. Ninov, N., Borius, M. & Stainier, D. Y. R. Different levels of Notch signaling  
1431 regulate quiescence, renewal and differentiation in pancreatic endocrine  
1432 progenitors. *Development* **139**, 1557–1567 (2012).
- 1433 70. Chi, N. C., Shaw, R. M., De Val, S., Kang, G., Jan, L. Y., Black, B. L. &  
1434 Stainier, D. Y. R. Foxn4 directly regulates tbx2b expression and  
1435 atrioventricular canal formation. *Genes Dev.* **22**, 734–739 (2008).
- 1436 71. Choi, J., Dong, L., Ahn, J., Dao, D., Hammerschmidt, M. & Chen, J. N. FoxH1  
1437 negatively modulates flk1 gene expression and vascular formation in zebrafish.  
1438 *Dev. Biol.* **304**, 735–744 (2007).
- 1439 72. Kikuchi, K., Gupta, V., Wang, J., Holdway, J. E., Wills, A. A., Fang, Y. & Poss,  
1440 K. D. tcf21+ epicardial cells adopt non-myocardial fates during zebrafish heart  
1441 development and regeneration. *Development* **138**, 2895–902 (2011).
- 1442 73. Mickoleit, M., Schmid, B., Weber, M., Fahrbach, F. O., Hombach, S.,  
1443 Reischauer, S. & Huisken, J. High-resolution reconstruction of the beating  
1444 zebrafish heart. *Nat. Methods* **11**, 919–922 (2014).
- 1445 74. Schindelin, J., Arganda-Carreras, I., Frise, E., Kaynig, V., Longair, M.,  
1446 Pietzsch, T., Preibisch, S., Rueden, C., Saalfeld, S., Schmid, B., Tinevez, J.  
1447 Y., White, D. J., Hartenstein, V., Eliceiri, K., Tomancak, P. & Cardona, A. Fiji:  
1448 An open-source platform for biological-image analysis. *Nature Methods* vol. 9  
1449 676–682 (2012).
- 1450 75. Burns, C. G. & MacRae, C. A. Purification of hearts from zebrafish embryos.  
1451 *BioTechniques* vol. 40 274–282 (2006).

1452

1453

1454 **Videos:**

1455

1456 Videos 1-8 can be found deposited on Dropbox via the following link:

1457 [https://www.dropbox.com/sh/xy5re3qvf4oc327/AAAVYj6SICxZBJGKKYQLNI6la?dl=](https://www.dropbox.com/sh/xy5re3qvf4oc327/AAAVYj6SICxZBJGKKYQLNI6la?dl=0)

1458 [0](#)

1459

1460 Video 1: LSFM-acquired heartbeat-synchronised time-lapse of a

1461 *Tg(csf1ra:mCherry;mpeg1:GFP)* heart showing macrophage heterogeneity following  
1462 cardiac injury.

1463 Video 2: LSFM-acquired heartbeat-synchronised time-lapse of a

1464 *Tg(mpeg1:mCherry;tnfa:GFP)* heart showing macrophage plasticity following cardiac  
1465 injury.

1466 Video 3: LSFM-acquired heartbeat-synchronised time-lapse of a *Tg(myI7:h2b-*

1467 *GFP;myI7:mKateCAAX)* heart following cardiac injury showing cardiomyocyte  
1468 apoptosis following injury.

1469 Video 4: LSFM-acquired heartbeat-synchronised time-lapse of a *Tg(myI7:h2b-*

1470 *GFP;mpeg1:GFP)* heart injected with propidium iodide showing PI+ cardiomyocyte  
1471 expulsion following cardiac injury.

1472 Video 5: LSFM-acquired heartbeat-synchronised time-lapse of a

1473 *Tg(myI7:GFP;mpeg1:mCherry)* heart, 3D surface rendered, showing removal and  
1474 internalization of myocardial debris by macrophages following injury.

1475 Video 6: LSFM-acquired heartbeat-synchronised time-lapse of a *Tg(myI7:GFP)*

1476 heart, 3D surface rendered, showing budding and bridging of wound margin  
1477 myocardium following injury.

1478 Video 7: LSFM-acquired heartbeat-synchronised time-lapse of a *Tg(myI7:h2b-*

1479 *GFP;myI7:mKateCAAX)* heart, showing budding and bridging of individual wound-  
1480 margin cardiomyocytes following injury.

1481 Video 8: LSFM-acquired heartbeat-synchronised time-lapse of a *Tg(myI7:h2b-*

1482 *GFP;myI7:mKateCAAX)* heart, showing cardiomyocyte cell division with nuclear  
1483 division and cytokinesis.

1484

1485

1486

1487
